# Supplementary material for: Contribution of leukocyte telomere length to major cardiovascular diseases onset: phenotypic and genetic insights from a large-scale genome-wide cross-trait analysis
Source: medRxiv preprint, doi:10.1101/2024.05.20.24307614, version 2 (2024-05-23)
Supplement: Supplementary Note Table [file 307614_file10.xlsx]

## Sheet: Summary
Supplementary Note Table 1. Overview of leukocyte telomere length and five cardiovascular diseases in East Asian populations included in this study
Supplementary Note Table 2. Univariate and bivariate LDSC results for leukocyte telomere length and five cardiovascular diseases in East Asian populations
Supplementary Note Table 3. Univariate and bivariate MiXeR results for leukocyte telomere length and five cardiovascular diseases in East Asian populations
Supplementary Note Table 4. Univariate LAVA results for each of leukocyte telomere length and five cardiovascular diseases in East Asian populations
Supplementary Note Table 5. Bivariate LAVA results between leukocyte telomere length and five cardiovascular diseases in East Asian populations
Supplementary Note Table 6. Causal relationship leukocyte telomere length and five cardiovascular diseases in East Asian populations
Supplementary Note Table 7. Genomic risk loci identified for PLACO results of leukocyte telomere length and five cardiovascular diseases in East Asian populations using FUMA
Supplementary Note Table 8. Genomic risk loci identified for single trait GWAS results of leukocyte telomere length and five cardiovascular diseases in East Asian populations using FUMA
Supplementary Table Note 9. Prioritized genes identified for PLACO results of leukocyte telomere length and five cardiovascular diseases in East Asian populations by functional annotation and mapping of genomic risk loci using FUMA
Supplementary Table Note 10. Prioritized genes identified for single trait GWAS results of leukocyte telomere length and five cardiovascular diseases in East Asian populations by functional annotation and mapping of genomic risk loci using FUMA
Supplementary Table Note 11. Candidate pleiotropic genes identified for PLACO results of leukocyte telomere length and five cardiovascular diseases in East Asian populations using MAGMA
Supplementary Note Table 12. Gene-based analysis for all genes that were nominally significant for PLACO results between leukocyte telomere length and five cardiovascular diseases in East Asian populations
Supplementary Note Table 13. Gene-based analysis for all genes that were nominally significant for single trait GWAS results of leukocyte telomere length and five cardiovascular diseases in East Asian populations
Supplementary Note Table 14. Gene sets significantly associated with PLACO results between leukocyte telomere length and five cardiovascular diseases in East Asian populations

## Sheet: Supplementary Note Table 1
Supplementary Note Table 1. Overview of leukocyte telomere length and five cardiovascular diseases in East Asian populations included in this study
Note: Overview of leukocyte telomere length and five cardiovascular diseases in East Asian populations, abbreviations as used throughout the manuscript, associated PubMed ID, Data source and Year of publication, the sample size, population and reference genome on which summary statistics are based, and the number of SNPs included in the original summary statistics, before we applied filtering.
Trait	Abbreviations	PubMed ID	Data source	Year	Population	N	N case	N control	Reference genome	Original no. of SNPs
leukocyte telomere length	TL_EAS	31171785	https://figshare.com/articles/dataset/Singapore_Chinese_LTL_GWAS_Meta-analysis/8066999	2019	East Asian	23096	NA	NA	GRCh37 (hg19)	6372032
Atrial fibrillation	AF_EAS	28416822	http://jenger.riken.jp/en/result	2017	East Asian	36792	8180	28612	GRCh37 (hg19)	5018048
Coronary artery disease	CAD_EAS	32514122	http://jenger.riken.jp/en/result	2020	East Asian	212453	29319	183134	GRCh37 (hg19)	8678731
Heart failure	HF_EAS	32514122	http://jenger.riken.jp/en/result	2020	East Asian	212453	9413	203040	GRCh37 (hg19)	8678731
Peripheral artery disease	PAD_EAS	32514122	http://jenger.riken.jp/en/result	2020	East Asian	212046	3593	208453	GRCh37 (hg19)	8678731
Stroke	Stroke_EAS	32514122	http://jenger.riken.jp/en/result	2020	East Asian	210054	17671	192383	GRCh37 (hg19)	8678632

## Sheet: Supplementary Note Table 2
Supplementary Note Table 2. Univariate and bivariate LDSC results for leukocyte telomere length and five cardiovascular diseases in East Asian populations
A) SNP-based heritability of leukocyte telomere length and five cardiovascular diseases in East Asian populations computed using univariate LDSC
Note: SNP-based heritabilities (h2snp) for leukocyte telomere length and five cardiovascular diseases in East Asian populations were calculated using LD Score regression, based on summary statistics. h2snp = SNP-based heritability estimate; h2snp_se = standard error of the SNP-based heritability estimate; h2snp_p =p value of the SNP-based heritability estimate; Mean χ2 = Mean chi-squared value ac…
Trait	h2 snp	h2snp_se	h2snp_p	λGC	Mean χ2	int	int_se	ratio	ratio_se
LTL_EAS	0.1375	0.0254	6.18e-08	1.0195	1.0431	0.9707	0.0089	<0	<0
AF_EAS	0.1443	0.0315	4.63e-06	1.2932	1.3257	1.2094	0.0115	0.6431	-0.0354
CAD_EAS	0.0695	0.0071	1.26e-22	1.2103	1.3477	1.0112	0.0121	0.0321	-0.0349
HF_EAS	0.01	0.0024	3.09e-05	1.0618	1.0655	1.0179	0.0077	0.273	-0.1171
PAD_EAS	0.0145	0.0025	6.63e-09	1.0345	1.0554	0.9866	0.0092	<0	<0
Stroke_EAS	0.0152	0.003	4.05e-07	1.0864	1.098	1.0266	0.0097	0.2717	-0.0989
B) Genome-wide genetic correlations between leukocyte telomere length and five cardiovascular diseases in East Asian populations computed using bivariate LDSC
Note: Genome-wide genetic correlations between leukocyte telomere length and five cardiovascular diseases in East Asian populations were estimated by LD Score regression, based on summary statistics. Tests are two-sided and only tests significant after correcting for multiple testing were interpreted. rg = genetic correlation; re_se = standard error of rg; rg_z = Z-score of the rg; rg_p = p-value…
P-values lower than the Bonferroni-corrected threshold (P = 0.05/5 combinations = 0.01) are considered significant and marked in blue.
Trait 1	Trait 2	rg	rg_se	rg_z	rg_p	h2_liab	h2_liab_se	h2_int	h2_int_se	gcov_int	gcov_int_se
LTL_EAS	AF_EAS	0.0359	0.1103	0.325	0.7451	0.1283	0.0234	1.2215	0.0153	-0.0029	0.0061
LTL_EAS	CAD_EAS	-0.0504	0.0828	-0.6082	0.5431	0.0707	0.0086	1.0065	0.0153	0.0033	0.007
LTL_EAS	HF_EAS	-0.1305	0.1439	-0.9067	0.3646	0.01	0.0024	1.0179	0.0077	0.0032	0.0061
LTL_EAS	PAD_EAD	-0.2451	0.1236	-1.9836	0.0473	0.0145	0.0025	0.9867	0.0092	0.0117	0.006
LTL_EAS	Stroke_EAS	0.0189	0.1215	0.1557	0.8763	0.0151	0.003	1.0267	0.0097	-0.0019	0.0057

## Sheet: Supplementary Note Table 3
Supplementary Note Table 3. Univariate and bivariate MiXeR results for leukocyte telomere length and five cardiovascular diseases in East Asian populations
A) Polygenicity of leukocyte telomere length and five cardiovascular diseases in East Asian populations computed using univariate MiXeR
Note: Polygenicities for leukocyte telomere length and five cardiovascular diseases in East Asian populations were estimated using univariate MiXeR. pi = polygenicity estimate; pi_se = standard error of the polygenicity estimate; sig2_beta = discoverability estimate; sig2_beta_se = standard error of the discoverability estimate; h2 = heritability estimate; h2_se = standard error of the heritabili…
Trait	Trait polygenicity		Trait discoverability				Trait heritability		Number of trait-influencing variants (at 90% heritability)		Model selection (information criterions)
	pi	pi_se	sig2_beta	sig2_beta_se	sig2_zero	sig2_zero_se	h2	h2_se	nc_p9	nc_p9_se	AIC	BIC
LTL_EAS	1.115e-05	6.6252e-06	0.00328781	0.000982493	0.99798	0.00255292	0.0599752	0.00466534	31.1886	18.5318	261.123	252.13
AF_EAS	1.03e-05	2.51e-06	0.00529712	0.00137043	1.25579	0.00189511	0.099799	0.00600418	28.9379	7.01468	456.681	447.688
CAD_EAS	0.000225121	1.52e-05	0.000265179	1.53e-05	1.08782	0.00223693	0.114902	0.00203074	629.702	42.482	918.027	909.034
HF_EAS	0.000541877	0.000200968	4.97967e-05	1.13711e-05	1.02386	0.00361471	0.0481848	0.00517334	1515.72	562.142	-0.721582	-9.71466
PAD_EAS	0.000341078	7.53229e-05	0.000247924	4.20251e-05	1.00576	0.00333198	0.157716	0.0134652	954.053	210.691	4.81538	-4.17769
Stroke_EAS	0.000311412	4.42138e-05	7.71232e-05	9.91099e-06	1.03826	0.00281302	0.0456094	0.00249875	871.074	123.674	15.1845	6.1914
B) Polygenic overlaps between leukocyte telomere length and five cardiovascular diseases in East Asian populations computed using bivariate MiXeR
Note: Polygenic overlaps leukocyte telomere length and five cardiovascular diseases in East Asian populations were estimated using bivariate MiXeR. Dice = the ratio of shared variants to the total number of variants; Dice_se = standard error of Dice coefficient; nc1_p9, nc2_p9 and nc12_p9 = the number of influencial variants for trait1, trait2 and the overlap, respectively; nc1_p9_se, nc2_p9_se a…
Trait1	Trait2	Dice Coefficient		Fraction of shared and trait-specific variants						Number of shared and trait-specific variants (at 90% heritability)						Measures of correlation						Congruency		Model selection (information criterions)
		Dice	Dice_se	pi1	pi1_se	pi2	pi2_se	pi12	pi12_se	nc1_p9	nc1_p9_se	nc2_p9	nc2_p9_se	nc12_p9	nc12_p9_se	rho_zero	rho_zero_se	rho_beta	rho_beta_se	rg	rg_se	fraction_concordant_within_shared	fraction_concordant_within_shared_se	best_vs_min_AIC	best_vs_min_BIC	best_vs_max_AIC	best_vs_max_BIC
LTL_EAS	AF_EAS	0.175154	0.0961611	9.40778e-06	6.68099e-06	8.60317e-06	2.7089e-06	1.74225e-06	8.09762e-07	26.3152	18.6879	24.0645	7.57725	4.87338	2.26504	-0.00106462	0.00259969	0.0984932	0.45772	0.0178111	0.0660988	0.538599	0.166533	4.19431	-4.79876	24.5691	15.576
LTL_EAS	CAD_EAS	0.0544562	0.0278846	4.7391e-06	5.10849e-06	0.00021871	1.6411e-05	6.41093e-06	3.3151e-06	13.2561	14.2893	611.769	45.9043	17.9325	9.27291	-0.0029418	0.00224838	0.0362473	0.374452	0.0110904	0.0414639	0.512321	0.137744	6.50166	-2.49141	1.07246	-7.92062
LTL_EAS	HF_EAS	0.0423417	0.0243638	8.76568e-10	1.67417e-09	0.000530728	0.000198215	1.11492e-05	6.62381e-06	0.00245191	0.00468295	1484.54	554.441	31.1861	18.5279	0.00209131	0.00191569	-0.999964	5.03382e-05	-0.14319	0.0358583	0.00214388	0.00162647	-1.98864	-10.9817	-1.98166	-10.9747
LTL_EAS	PAD_EAS	0.062632	0.0264049	1.15193e-10	1.53199e-10	0.000329928	7.2334e-05	1.11499e-05	6.62508e-06	0.000322214	0.000428523	922.865	202.331	31.1882	18.5315	0.00330441	0.00164304	-0.999992	1.1551e-05	-0.176659	0.0362617	0.00103602	0.000775512	-1.9965	-10.9896	-1.99359	-10.9867
LTL_EAS	Stroke_EAS	0.0462635	0.0389994	3.7254e-06	3.61222e-06	0.000303988	4.47055e-05	7.42463e-06	5.97663e-06	10.4206	10.104	850.306	125.049	20.768	16.7177	-0.000828026	0.00197478	-0.392428	0.45647	-0.0506591	0.0532827	0.34476	0.187431	1.07374	-7.91934	4.54874	-4.44433

## Sheet: Supplementary Note Table 4
Supplementary Note Table 4. Univariate LAVA results for each of leukocyte telomere length and five cardiovascular diseases in East Asian populations
Note: results of univariate LAVA analysis, testing for local genetic signal within each trait in 1,445 regions. Tests are one-sided. Regions with a P-value < 0.0001 were deemed to harbor sufficient genetic signal for meaningful local genetic correlation estimation with other traits. locus = index of given local genomic regions; chr = chromosome; start/stop = start and end position of locus in bas…
P-values lower than 1e-04 are considered significant and marked in blue.
locus	chr	start	stop	n.snps	n.pcs	Trait	h2.obs	p
2	1	1976559	3492739	401	148	LTL_EAS	0.00164929	0.0187028
3	1	3492740	4543012	363	123	LTL_EAS	0.00128366	0.0363526
4	1	4543013	5914790	702	209	LTL_EAS	0.00460033	2.91753e-06
5	1	5914791	7365002	509	137	LTL_EAS	0.000593976	0.200429
6	1	7365003	9002909	467	143	LTL_EAS	0.00266923	0.000565084
7	1	9002910	10755520	476	145	LTL_EAS	0.000688417	0.174246
8	1	10755521	11708678	243	103	LTL_EAS	0.00094796	0.0705116
9	1	11708679	13811000	362	122	LTL_EAS	0.00194614	0.00437143
10	1	13811001	14893157	539	179	LTL_EAS	0.00194762	0.012834
11	1	14893158	17875820	942	219	LTL_EAS	0.00351865	0.00022692
12	1	17875821	20304720	1046	286	LTL_EAS	0.00448576	4.61936e-05
13	1	20304721	22145806	586	162	LTL_EAS	0.000531788	0.241931
14	1	22145807	23916165	586	162	LTL_EAS	0.00311044	0.000194463
15	1	23916166	25516893	492	140	LTL_EAS	0.00104103	0.0811138
16	1	25516894	27400828	407	85	LTL_EAS	0.000699831	0.111764
18	1	30161898	32043093	848	213	LTL_EAS	0.00638549	1.16148e-09
19	1	32043094	34941267	874	211	LTL_EAS	0.00190674	0.020926
20	1	34941268	36857533	415	93	LTL_EAS	0.00050645	0.191929
21	1	36857534	39550621	867	224	LTL_EAS	0.00585799	2.552e-08
22	1	39550622	41288115	494	116	LTL_EAS	0.00149181	0.0174578
23	1	41288116	43366279	637	132	LTL_EAS	4.8396e-05	0.456575
24	1	43366280	45082440	581	130	LTL_EAS	0.000905875	0.101786
25	1	45082441	47651005	667	96	LTL_EAS	0.00049748	0.199285
27	1	50644821	54973025	987	201	LTL_EAS	0.00315735	0.000491596
28	1	54973026	56412729	624	162	LTL_EAS	0.000759648	0.164775
29	1	56412730	57021655	279	64	LTL_EAS	0.000186982	0.333106
30	1	57021656	58196478	566	128	LTL_EAS	0.000503388	0.228137
31	1	58196479	59188245	535	121	LTL_EAS	0.00111962	0.0553078
32	1	59188246	60232862	322	95	LTL_EAS	0.000525486	0.186292
33	1	60232863	62109988	669	184	LTL_EAS	0.00245073	0.00326969
34	1	62109989	64095111	695	158	LTL_EAS	0.00129281	0.0529919
36	1	65041377	66774011	643	136	LTL_EAS	0.00323731	4.23487e-05
37	1	66774012	68477862	726	140	LTL_EAS	0.00532489	1.53821e-09
38	1	68477863	69687902	392	99	LTL_EAS	0.00049286	0.204666
39	1	69687903	72285466	719	151	LTL_EAS	0.0015317	0.0269172
41	1	74327079	76728120	735	123	LTL_EAS	0.00110281	0.0591351
43	1	79112110	80341732	449	83	LTL_EAS	0.000187548	0.351519
44	1	80341733	81990569	614	157	LTL_EAS	0.00173339	0.0168767
45	1	81990570	83991644	620	129	LTL_EAS	0.000551984	0.209581
46	1	83991645	86012417	810	158	LTL_EAS	0.00170025	0.0187585
47	1	86012418	88408033	883	178	LTL_EAS	0.00366203	3.94183e-05
48	1	88408034	90066205	489	105	LTL_EAS	0.000388832	0.258812
49	1	90066206	92938314	932	177	LTL_EAS	0.000412861	0.297693
50	1	92938315	93568956	116	17	LTL_EAS	0.000384514	0.0767182
51	1	93568957	96151207	953	197	LTL_EAS	0.000158186	0.414778
53	1	97949736	99555996	424	74	LTL_EAS	0.00064265	0.115238
54	1	99555997	101849109	807	159	LTL_EAS	0.00176627	0.0158581
56	1	102644328	105413133	638	106	LTL_EAS	0.000436129	0.237373
58	1	106767765	110304092	1068	211	LTL_EAS	0.00166219	0.0366208
59	1	110304093	112347256	861	206	LTL_EAS	0.00614788	2.41002e-09
60	1	112347257	114872038	791	180	LTL_EAS	0.00312255	0.000321353
61	1	114872039	118104015	1066	209	LTL_EAS	0.00164585	0.0373272
62	1	118104016	142545956	902	164	LTL_EAS	0.00146882	0.0368324
63	1	142545957	147914609	463	93	LTL_EAS	0.000581245	0.161812
64	1	147914610	152537155	637	113	LTL_EAS	0.000453253	0.236335
65	1	152537156	153397055	384	59	LTL_EAS	0.000356874	0.216004
66	1	153397056	156616039	777	154	LTL_EAS	0.00144398	0.0350922
67	1	156616040	157982579	542	136	LTL_EAS	0.000867386	0.115761
68	1	157982580	159953315	703	161	LTL_EAS	0.00196349	0.00931007
69	1	159953316	162888864	1212	245	LTL_EAS	0.00133399	0.0868017
70	1	162888865	164954020	841	191	LTL_EAS	0.00487765	4.02264e-07
71	1	164954021	168175845	1343	265	LTL_EAS	0.00504538	3.72082e-06
72	1	168175846	170169621	779	151	LTL_EAS	0.00182359	0.0118726
74	1	172932967	175387679	725	90	LTL_EAS	0.0015496	0.00767838
75	1	175387680	177937441	861	161	LTL_EAS	0.00100903	0.101404
76	1	177937442	181116840	1094	164	LTL_EAS	0.000403468	0.294716
77	1	181116841	183553326	897	166	LTL_EAS	0.00292484	0.000439593
78	1	183553327	185513153	749	134	LTL_EAS	0.00240089	0.00117365
83	1	192349899	194108441	464	93	LTL_EAS	0.000198021	0.352799
84	1	194108442	195996764	538	83	LTL_EAS	0.000207499	0.33883
85	1	195996765	198541162	624	94	LTL_EAS	0.000736758	0.111439
86	1	198541163	201071502	866	168	LTL_EAS	0.000196294	0.389676
87	1	201071503	203648600	1061	271	LTL_EAS	0.00217294	0.0200018
89	1	205271008	208809070	1057	248	LTL_EAS	0.00483744	4.68039e-06
91	1	209837237	212344930	969	200	LTL_EAS	0.0015673	0.0411461
92	1	212344931	213936674	539	126	LTL_EAS	0.00113804	0.0558495
93	1	213936675	216245665	921	171	LTL_EAS	0.00045527	0.277303
94	1	216245666	218342976	898	181	LTL_EAS	0.00197819	0.012149
95	1	218342977	220125116	656	138	LTL_EAS	0.00102797	0.0821921
96	1	220125117	221151629	336	94	LTL_EAS	0.000679286	0.128814
99	1	225965359	228102732	776	167	LTL_EAS	0.00666016	8.81509e-12
100	1	228102733	230437262	789	180	LTL_EAS	0.00186367	0.0162774
101	1	230437263	232090252	748	185	LTL_EAS	0.00202785	0.0112335
102	1	232090253	233369741	595	166	LTL_EAS	0.000641523	0.205102
103	1	233369742	234839043	672	175	LTL_EAS	0.0036014	4.49707e-05
104	1	234839044	236202705	331	87	LTL_EAS	0.0018862	0.00176453
105	1	236202706	237419495	561	147	LTL_EAS	0.00196794	0.00712604
106	1	237419496	238922341	685	172	LTL_EAS	0.00159721	0.0292483
108	1	239566656	241169137	704	191	LTL_EAS	0.00278327	0.00133194
109	1	241169138	242420888	569	181	LTL_EAS	0.000826229	0.158482
110	1	242420889	244512787	643	168	LTL_EAS	0.000243111	0.367765
111	1	244512788	245966754	478	161	LTL_EAS	0.0043355	1.02451e-06
113	1	247344631	249239466	425	112	LTL_EAS	0.000714056	0.137062
114	2	10133	2645948	958	221	LTL_EAS	0.0017441	0.0332856
115	2	2645949	4015665	605	176	LTL_EAS	0.000244063	0.370233
116	2	4015666	5529462	449	125	LTL_EAS	0.000120458	0.414511
117	2	5529463	6967943	626	166	LTL_EAS	0.000961162	0.115041
120	2	10083950	12419387	962	261	LTL_EAS	0.00483423	7.13516e-06
121	2	12419388	14757213	776	174	LTL_EAS	0.000925234	0.128581
122	2	14757214	16549757	589	164	LTL_EAS	0.000632169	0.206942
124	2	17515332	19692796	818	193	LTL_EAS	0.00173041	0.0264635
126	2	20402939	23703344	991	237	LTL_EAS	0.00349083	0.000376268
127	2	23703345	26209579	588	121	LTL_EAS	0.000408668	0.263538
129	2	29456861	31111554	737	184	LTL_EAS	0.000787372	0.171251
130	2	31111555	33363144	641	162	LTL_EAS	0.00130572	0.0533536
131	2	33363145	34016909	278	94	LTL_EAS	0.00143334	0.0131338
134	2	36123029	38132911	879	220	LTL_EAS	0.00130692	0.0802401
135	2	38132912	40508070	810	207	LTL_EAS	0.000603024	0.242249
136	2	40508071	42336744	839	199	LTL_EAS	0.00050648	0.272342
137	2	42336745	44322128	699	191	LTL_EAS	0.00316477	0.00037313
138	2	44322129	46482634	999	279	LTL_EAS	0.00414746	0.00011672
139	2	46482635	47806040	543	192	LTL_EAS	0.00028797	0.356542
140	2	47806041	49116026	332	115	LTL_EAS	0.000238717	0.344391
141	2	49116027	50818256	760	175	LTL_EAS	0.000475305	0.271608
142	2	50818257	52491017	693	175	LTL_EAS	0.000141752	0.41744
143	2	52491018	53355222	407	101	LTL_EAS	0.00021204	0.350165
145	2	54686323	57429035	1104	212	LTL_EAS	0.00240296	0.00597194
147	2	57726345	60728136	1138	240	LTL_EAS	0.00146931	0.0662158
150	2	64625086	65936332	410	126	LTL_EAS	0.00044981	0.249184
151	2	65936333	67227248	542	139	LTL_EAS	0.000366425	0.2961
152	2	67227249	69375742	977	221	LTL_EAS	0.00168956	0.0374554
153	2	69375743	70579922	367	82	LTL_EAS	0.00141861	0.00995365
154	2	70579923	73125598	696	194	LTL_EAS	0.00268979	0.00190362
155	2	73125599	75409633	610	144	LTL_EAS	0.0001603	0.399556
156	2	75409634	76647377	518	131	LTL_EAS	0.000942925	0.094301
158	2	78080015	80049718	868	196	LTL_EAS	0.00286708	0.00113425
159	2	80049719	83606074	1030	194	LTL_EAS	0.00219895	0.00801594
160	2	83606075	85893191	637	127	LTL_EAS	0.000546205	0.210111
165	2	98629110	100544638	492	97	LTL_EAS	0.000642083	0.144563
166	2	100544639	101557234	399	81	LTL_EAS	0.00251364	6.49183e-05
167	2	101557235	103759508	793	158	LTL_EAS	0.00343105	4.71161e-05
168	2	103759509	104714865	175	39	LTL_EAS	0.000445672	0.125177
169	2	104714866	107780932	1085	239	LTL_EAS	0.003461	0.00043129
171	2	108996019	113477211	851	181	LTL_EAS	0.0010269	0.110061
172	2	113477212	116413651	831	170	LTL_EAS	0.00134475	0.0523883
173	2	116413652	119581738	899	159	LTL_EAS	0.0031999	0.00012406
174	2	119581739	121554317	564	151	LTL_EAS	0.0015875	0.0231618
175	2	121554318	123396005	464	111	LTL_EAS	0.000331427	0.292722
179	2	129313015	131767129	589	142	LTL_EAS	0.000815012	0.134127
181	2	132783545	135158693	893	233	LTL_EAS	0.00373322	0.000155825
183	2	136977977	139414544	903	181	LTL_EAS	0.000827964	0.158007
185	2	140903959	142793066	796	167	LTL_EAS	0.0011861	0.0727709
188	2	147956521	150473193	640	120	LTL_EAS	0.000650464	0.16548
189	2	150473194	153465188	1043	192	LTL_EAS	0.00125772	0.0746623
190	2	153465189	155637294	680	175	LTL_EAS	0.00118737	0.0769267
191	2	155637295	157560495	449	86	LTL_EAS	3.08027e-06	0.477677
193	2	159577116	161769655	735	125	LTL_EAS	0.000468233	0.240382
196	2	165203974	167128466	645	136	LTL_EAS	0.00136461	0.0346798
198	2	167490429	169588988	682	166	LTL_EAS	0.00270977	0.000943662
199	2	169588989	171319417	717	168	LTL_EAS	0.000302131	0.340874
200	2	171319418	174122650	971	221	LTL_EAS	0.00239837	0.00686172
201	2	174122651	177074923	827	203	LTL_EAS	0.00371243	7.42145e-05
202	2	177074924	179244504	656	126	LTL_EAS	0.00142698	0.0252526
203	2	179244505	181812685	893	184	LTL_EAS	0.00295257	0.000646883
204	2	181812686	184145976	754	142	LTL_EAS	0.000101444	0.429754
205	2	184145977	186242927	509	105	LTL_EAS	0.000445925	0.231886
206	2	186242928	188897634	620	84	LTL_EAS	0.000766487	0.0919747
207	2	188897635	191973455	764	145	LTL_EAS	0.000710063	0.167318
208	2	191973456	195123359	482	122	LTL_EAS	0.000578264	0.193324
213	2	201357290	202542475	332	72	LTL_EAS	0.000363643	0.233224
214	2	202542476	205363047	793	156	LTL_EAS	0.00132596	0.0480295
215	2	205363048	208120624	932	216	LTL_EAS	0.00213567	0.0126509
217	2	209941700	212194775	596	99	LTL_EAS	0.000652563	0.143257
218	2	212194776	214013653	646	158	LTL_EAS	0.000561637	0.228044
220	2	215573227	218395307	997	239	LTL_EAS	0.00150802	0.0612011
221	2	218395308	219853567	443	103	LTL_EAS	0.00193897	0.00257183
222	2	219853568	222520904	1006	221	LTL_EAS	0.000830099	0.180355
223	2	222520905	224859323	723	187	LTL_EAS	0.000782122	0.174612
224	2	224859324	227665678	909	161	LTL_EAS	0.00298166	0.000306711
225	2	227665679	229593915	679	150	LTL_EAS	0.00180609	0.0122921
226	2	229593916	232191250	890	209	LTL_EAS	0.000859982	0.165917
227	2	232191251	233550713	370	108	LTL_EAS	0.00125647	0.031286
229	2	234883168	236066960	568	190	LTL_EAS	0.00188691	0.0173735
230	2	236066961	237201266	327	102	LTL_EAS	0.00311949	1.1682e-05
231	2	237201267	238502381	407	126	LTL_EAS	0.00168	0.0116867
232	2	238502382	240328718	674	187	LTL_EAS	0.00225999	0.00605881
233	2	240328719	241459497	451	147	LTL_EAS	0.00173998	0.0141971
237	3	1164058	2863911	971	256	LTL_EAS	0.00317211	0.00139805
238	3	2863912	5108349	1094	292	LTL_EAS	0.00790942	7.78027e-11
239	3	5108350	6724765	699	222	LTL_EAS	0.00434686	1.26948e-05
240	3	6724766	8051951	738	192	LTL_EAS	0.000726743	0.194062
241	3	8051952	9899533	797	218	LTL_EAS	0.00182709	0.0269549
242	3	9899534	11019488	533	174	LTL_EAS	0.0022134	0.00556622
243	3	11019489	12860229	659	158	LTL_EAS	0.00133832	0.0475562
244	3	12860230	14816750	785	222	LTL_EAS	0.00559208	7.57354e-08
245	3	14816751	16664547	684	159	LTL_EAS	5.58369e-05	0.456658
246	3	16664548	17891041	286	72	LTL_EAS	0.000306277	0.26589
247	3	17891042	19789003	415	108	LTL_EAS	0.000352304	0.279634
248	3	19789004	20375345	196	48	LTL_EAS	0.00037509	0.183483
249	3	20375346	21643707	515	143	LTL_EAS	0.00105806	0.0799921
251	3	22647521	25460047	1106	260	LTL_EAS	0.00243149	0.01008
253	3	27611778	30484625	1065	254	LTL_EAS	0.00304825	0.00191455
254	3	30484626	31726060	541	153	LTL_EAS	4.75204e-05	0.460131
255	3	31726061	32845663	389	149	LTL_EAS	0.000362589	0.303998
256	3	32845664	33989246	321	76	LTL_EAS	0.000500634	0.17206
258	3	35283409	38353505	1027	179	LTL_EAS	0.00228285	0.00494621
259	3	38353506	40796032	834	158	LTL_EAS	0.00193452	0.00963673
260	3	40796033	42540434	475	124	LTL_EAS	0.000188451	0.376615
261	3	42540435	45151576	680	128	LTL_EAS	0.000960543	0.0882671
263	3	45992978	47793553	423	77	LTL_EAS	0.000363309	0.240376
264	3	47793554	51831792	799	63	LTL_EAS	2.37059e-05	0.45711
267	3	55348769	56847831	542	113	LTL_EAS	0.000534802	0.201747
268	3	56847832	59704331	822	163	LTL_EAS	0.001215	0.0661786
269	3	59704332	61958750	1137	274	LTL_EAS	0.00166502	0.0557517
270	3	61958751	63669879	765	205	LTL_EAS	0.000277325	0.365369
271	3	63669880	65273079	756	218	LTL_EAS	0.00306473	0.000963106
272	3	65273080	66270447	270	110	LTL_EAS	5.09689e-06	0.479043
273	3	66270448	67742901	587	164	LTL_EAS	0.00329049	0.000103597
275	3	68646219	70449028	624	178	LTL_EAS	0.000360623	0.319919
276	3	70449029	72528426	650	231	LTL_EAS	0.00189421	0.026066
277	3	72528427	74398940	723	214	LTL_EAS	0.000603089	0.245735
278	3	74398941	75717386	255	68	LTL_EAS	0.00147009	0.00486271
279	3	75717387	79024471	947	209	LTL_EAS	0.00201879	0.0155987
280	3	79024472	82022276	715	106	LTL_EAS	0.00285807	5.36028e-05
281	3	82022277	82527031	126	24	LTL_EAS	0.000217009	0.219811
283	3	84961751	87590636	712	111	LTL_EAS	0.000567663	0.186805
284	3	87590637	89775033	534	90	LTL_EAS	0.00127709	0.0205997
287	3	96058348	98215516	463	92	LTL_EAS	0.000264522	0.312571
288	3	98215517	100553825	775	124	LTL_EAS	0.0014369	0.02376
290	3	102013410	104581613	703	130	LTL_EAS	6.28273e-05	0.448134
291	3	104581614	106834267	697	146	LTL_EAS	0.0020536	0.00532004
292	3	106834268	108638228	520	107	LTL_EAS	0.000834353	0.0988883
294	3	110929057	112455117	553	122	LTL_EAS	2.92505e-06	0.481389
295	3	112455118	113650586	426	93	LTL_EAS	0.00139551	0.0146452
296	3	113650587	115605661	473	141	LTL_EAS	0.000150809	0.403469
297	3	115605662	116898042	524	115	LTL_EAS	0.000116536	0.413234
299	3	118903463	120523073	584	110	LTL_EAS	0.00132244	0.026487
301	3	121822628	123198641	479	112	LTL_EAS	0.000994338	0.0692538
302	3	123198642	124936549	698	162	LTL_EAS	0.00129304	0.0549463
303	3	124936550	126214330	392	83	LTL_EAS	0.00102651	0.0411411
304	3	126214331	128194796	663	151	LTL_EAS	0.00342018	3.70946e-05
305	3	128194797	130024576	414	86	LTL_EAS	0.000809402	0.0835887
306	3	130024577	131836226	718	149	LTL_EAS	0.000177478	0.39253
310	3	137727496	139847179	636	122	LTL_EAS	0.000155711	0.393709
311	3	139847180	141034491	408	123	LTL_EAS	0.000791682	0.124708
312	3	141034492	142985100	597	141	LTL_EAS	0.00283327	0.000279402
316	3	148637334	150530065	608	168	LTL_EAS	0.00261933	0.00135199
317	3	150530066	151256352	281	75	LTL_EAS	0.00105934	0.031076
319	3	152222144	153407526	365	106	LTL_EAS	5.63568e-05	0.446594
321	3	154485882	157311596	837	167	LTL_EAS	0.00238912	0.00282021
322	3	157311597	159155377	576	95	LTL_EAS	0.000908424	0.0711011
323	3	159155378	161620009	737	138	LTL_EAS	0.000151724	0.40197
325	3	165935732	168270619	542	100	LTL_EAS	0.000526459	0.191592
326	3	168270620	172048457	1161	250	LTL_EAS	0.0141092	8.07776e-28
327	3	172048458	175051223	963	217	LTL_EAS	0.00206033	0.0154143
328	3	175051224	176928975	547	138	LTL_EAS	0.000493327	0.240248
330	3	179376589	181637723	422	103	LTL_EAS	0.000605967	0.164033
331	3	181637724	184112682	715	173	LTL_EAS	0.00052743	0.250431
332	3	184112683	186230742	637	185	LTL_EAS	0.0021774	0.00742423
333	3	186230743	188951597	961	263	LTL_EAS	0.00180809	0.039831
335	3	190355510	192344597	725	162	LTL_EAS	0.00182167	0.0142024
336	3	192344598	193962112	520	146	LTL_EAS	0.000965078	0.100574
337	3	193962113	195349066	446	144	LTL_EAS	0.0011074	0.0720155
338	3	195349067	196728482	283	91	LTL_EAS	0.000998259	0.0516798
339	3	196728483	197946622	245	56	LTL_EAS	0.000446632	0.163157
340	4	10240	695912	112	26	LTL_EAS	0.00071302	0.0219888
341	4	695913	2306583	393	98	LTL_EAS	7.17356e-05	0.434588
343	4	3384845	4989588	495	158	LTL_EAS	0.00281496	0.000519597
344	4	4989589	6325242	605	190	LTL_EAS	0.00122019	0.0794938
345	4	6325243	7663190	553	228	LTL_EAS	0.00197528	0.0211183
346	4	7663191	9217084	475	174	LTL_EAS	0.00301743	0.000395491
348	4	10698981	13004348	860	181	LTL_EAS	0.0027833	0.00106355
349	4	13004349	15148516	711	189	LTL_EAS	0.000426279	0.298176
350	4	15148517	16579695	651	164	LTL_EAS	0.00061572	0.212637
352	4	18752294	20486651	444	96	LTL_EAS	0.000688692	0.128111
353	4	20486652	22319288	741	175	LTL_EAS	0.00140246	0.0479937
354	4	22319289	24135369	611	164	LTL_EAS	0.0016457	0.0235091
355	4	24135370	26836317	893	258	LTL_EAS	0.00408363	8.90443e-05
356	4	26836318	29313037	778	166	LTL_EAS	0.00107842	0.0907929
357	4	29313038	31205517	503	133	LTL_EAS	0.00148025	0.024121
358	4	31205518	32593453	440	101	LTL_EAS	0.000936194	0.071045
360	4	35151583	36540810	454	102	LTL_EAS	0.00186536	0.00331678
361	4	36540811	38203464	725	182	LTL_EAS	0.00282368	0.000951833
362	4	38203465	40588393	849	240	LTL_EAS	0.00323602	0.000876735
363	4	40588394	42664297	688	178	LTL_EAS	0.000835656	0.154007
364	4	42664298	45189270	767	132	LTL_EAS	0.000220426	0.36351
366	4	47412254	47997645	194	39	LTL_EAS	0.00041454	0.140175
368	4	54658566	57458942	852	189	LTL_EAS	0.00252012	0.00290953
369	4	57458943	59360441	705	171	LTL_EAS	0.00182858	0.0158498
375	4	65592229	68741353	952	166	LTL_EAS	0.00236054	0.00302598
377	4	69601809	72418006	675	112	LTL_EAS	0.0007748	0.119256
378	4	72418007	74888947	632	123	LTL_EAS	0.000423322	0.258496
379	4	74888948	77718852	943	173	LTL_EAS	0.00127008	0.0634791
382	4	80322666	82691669	627	132	LTL_EAS	0.00125562	0.0440912
383	4	82691670	83510372	232	63	LTL_EAS	0.000222454	0.307109
384	4	83510373	84922154	455	85	LTL_EAS	0.000323081	0.272279
385	4	84922155	87214993	645	111	LTL_EAS	0.00016757	0.381898
386	4	87214994	89236855	638	134	LTL_EAS	0.00180606	0.0091811
387	4	89236856	90500460	391	94	LTL_EAS	0.00129515	0.0211766
388	4	90500461	92166236	513	105	LTL_EAS	0.00160893	0.00930244
390	4	94233169	95896913	498	110	LTL_EAS	9.96096e-05	0.421429
391	4	95896914	97912515	668	152	LTL_EAS	0.00209225	0.00532245
393	4	99040832	101711689	873	143	LTL_EAS	0.000948139	0.102125
395	4	102707194	105305539	662	101	LTL_EAS	0.00163127	0.00774618
399	4	111466214	114687995	983	212	LTL_EAS	0.00347	0.000224526
400	4	114687996	118224725	936	147	LTL_EAS	0.00198478	0.0067594
401	4	118224726	119932620	530	98	LTL_EAS	0.000196743	0.357113
402	4	119932621	121393951	465	88	LTL_EAS	0.000600326	0.148574
404	4	122458886	124387408	482	94	LTL_EAS	0.000898221	0.072217
405	4	124387409	126751239	755	172	LTL_EAS	0.000761647	0.171022
406	4	126751240	127833073	337	83	LTL_EAS	0.000496327	0.183693
409	4	131284306	133742120	604	132	LTL_EAS	0.000135638	0.408513
410	4	133742121	134111558	82	21	LTL_EAS	0.000293078	0.146933
411	4	134111559	135954226	298	60	LTL_EAS	0.00105804	0.0205962
413	4	137831943	139197294	442	116	LTL_EAS	0.000317483	0.303718
414	4	139197295	143226784	1294	280	LTL_EAS	0.000722162	0.237337
416	4	145025811	148834277	937	190	LTL_EAS	0.00057101	0.244294
417	4	148834278	150683433	459	98	LTL_EAS	0.000287425	0.30502
418	4	150683434	152782184	609	83	LTL_EAS	0.000267291	0.302176
419	4	152782185	154122370	412	115	LTL_EAS	0.00053023	0.205529
420	4	154122371	155546839	475	134	LTL_EAS	0.0014918	0.0236934
421	4	155546840	157596253	731	173	LTL_EAS	0.00409558	5.37428e-06
422	4	157596254	158455363	222	43	LTL_EAS	0.000344773	0.189205
423	4	158455364	161798202	864	183	LTL_EAS	0.000464867	0.280008
425	4	161998785	163413310	511	129	LTL_EAS	0.00234125	0.00125984
426	4	163413311	164173867	137	42	LTL_EAS	0.000841643	0.0267909
427	4	164173868	165472929	439	126	LTL_EAS	0.000561656	0.203245
428	4	165472930	166593952	393	113	LTL_EAS	0.000575193	0.185916
430	4	167853561	169676676	482	131	LTL_EAS	0.00111008	0.0632656
433	4	172963786	174857042	427	122	LTL_EAS	0.00129157	0.0350557
434	4	174857043	176376342	467	132	LTL_EAS	0.000596089	0.195502
435	4	176376343	179391123	964	244	LTL_EAS	0.00435707	2.41213e-05
436	4	179391124	180547908	417	131	LTL_EAS	0.000255746	0.34484
437	4	180547909	183473284	1288	321	LTL_EAS	0.00712696	8.49935e-09
438	4	183473285	184930023	460	180	LTL_EAS	0.00392601	1.46754e-05
439	4	184930024	186544264	556	188	LTL_EAS	0.000767484	0.179475
440	4	186544265	187867533	581	196	LTL_EAS	0.00292879	0.000929532
441	4	187867534	189155114	358	128	LTL_EAS	0.000974569	0.0853955
442	4	189155115	189915203	246	83	LTL_EAS	0.000644206	0.126853
443	4	189915204	191043594	148	62	LTL_EAS	0.000484297	0.156847
444	5	11940	1483180	304	111	LTL_EAS	0.0119172	2.93303e-32
445	5	1483181	2851269	707	213	LTL_EAS	0.00304121	0.000935733
446	5	2851270	4940255	953	246	LTL_EAS	0.00141739	0.0752274
448	5	5973037	8445402	1135	235	LTL_EAS	0.00438701	1.65561e-05
449	5	8445403	9873006	645	153	LTL_EAS	0.0008743	0.126859
450	5	9873007	11849590	843	224	LTL_EAS	0.00128218	0.0858145
452	5	13611632	17400372	1250	268	LTL_EAS	0.00313848	0.00185164
453	5	17400373	18850604	369	104	LTL_EAS	0.000425451	0.240339
454	5	18850605	22657008	954	152	LTL_EAS	0.000195523	0.384598
455	5	22657009	23719696	345	86	LTL_EAS	0.000563759	0.159821
456	5	23719697	26124488	640	135	LTL_EAS	0.00239948	0.00121581
459	5	29594525	31391126	577	140	LTL_EAS	0.000198377	0.378486
460	5	31391127	33500818	789	193	LTL_EAS	0.000354788	0.328862
461	5	33500819	35048572	578	165	LTL_EAS	0.000724554	0.177494
462	5	35048573	36433092	547	129	LTL_EAS	0.000670119	0.167013
464	5	38802789	40287729	562	116	LTL_EAS	0.00071138	0.141779
465	5	40287730	42858747	643	106	LTL_EAS	0.000675946	0.143063
467	5	44045381	49410915	329	38	LTL_EAS	0.000239571	0.247835
469	5	51701350	53748307	839	174	LTL_EAS	0.00211168	0.0075067
470	5	53748308	55416658	573	97	LTL_EAS	3.39199e-05	0.458772
471	5	55416659	57339005	688	175	LTL_EAS	0.00241515	0.00306308
473	5	58523946	61247124	789	152	LTL_EAS	0.00165806	0.0193509
474	5	61247125	62536058	423	59	LTL_EAS	3.15704e-05	0.44912
475	5	62536059	65205427	783	131	LTL_EAS	0.00136933	0.0320163
476	5	65205428	67851517	856	191	LTL_EAS	0.00161921	0.0337375
477	5	67851518	71419711	543	113	LTL_EAS	0.00261539	0.000228512
478	5	71419712	73759199	854	189	LTL_EAS	0.00335905	0.000177502
479	5	73759200	76221198	861	187	LTL_EAS	0.0028904	0.000857763
480	5	76221199	77283975	456	118	LTL_EAS	0.00011008	0.418041
481	5	77283976	79394041	741	181	LTL_EAS	0.000247661	0.370348
484	5	81237242	83972773	732	200	LTL_EAS	0.000116581	0.433953
486	5	85767058	87438020	254	71	LTL_EAS	0.000226246	0.314563
487	5	87438021	90423339	718	145	LTL_EAS	0.00233061	0.00205361
488	5	90423340	91840637	276	79	LTL_EAS	0.000171304	0.358782
489	5	91840638	93811097	369	90	LTL_EAS	0.000174828	0.36495
490	5	93811098	96374150	879	170	LTL_EAS	0.00161101	0.0276226
491	5	96374151	97316375	205	37	LTL_EAS	0.000932666	0.0135504
494	5	100595235	103181351	725	131	LTL_EAS	0.000317857	0.313909
495	5	103181352	104854817	399	85	LTL_EAS	0.000151558	0.376344
497	5	106909042	109233618	804	163	LTL_EAS	0.000579808	0.224749
498	5	109233619	110896791	491	132	LTL_EAS	0.00151872	0.0212537
499	5	110896792	112302830	438	124	LTL_EAS	0.000994412	0.0784685
500	5	112302831	113777986	638	127	LTL_EAS	0.000882817	0.104761
502	5	114751104	115879777	527	120	LTL_EAS	0.000144582	0.399111
503	5	115879778	117082850	408	111	LTL_EAS	0.00199334	0.00269493
506	5	119669847	122002653	632	149	LTL_EAS	0.000624523	0.198877
508	5	123240671	125128470	697	203	LTL_EAS	0.00171505	0.0302819
512	5	132007339	134777577	920	218	LTL_EAS	0.0016433	0.0403809
514	5	136376493	139409053	770	141	LTL_EAS	0.00199564	0.00577198
515	5	139409054	141852077	806	148	LTL_EAS	0.00278506	0.000426932
516	5	141852078	143592976	715	174	LTL_EAS	0.00273547	0.0010562
518	5	146434801	148549094	740	176	LTL_EAS	0.00273008	0.00112861
519	5	148549095	150911275	1071	245	LTL_EAS	0.00262786	0.00519136
520	5	150911276	152504700	549	110	LTL_EAS	0.00193212	0.00329468
522	5	153899308	156627810	823	162	LTL_EAS	0.00177403	0.0162111
524	5	157585549	159866697	739	184	LTL_EAS	0.00288322	0.000817934
525	5	159866698	161694489	678	147	LTL_EAS	0.0028492	0.000322935
527	5	163803608	165314602	461	143	LTL_EAS	0.00115896	0.0632034
528	5	165314603	167651859	777	249	LTL_EAS	0.00428734	3.54771e-05
529	5	167651860	169330611	782	209	LTL_EAS	0.00283396	0.00163899
530	5	169330612	170904981	659	176	LTL_EAS	0.00112527	0.0880434
531	5	170904982	172766002	666	207	LTL_EAS	0.00316845	0.000545707
532	5	172766003	174167623	621	186	LTL_EAS	0.00360811	6.40974e-05
533	5	174167624	176509938	706	212	LTL_EAS	0.00425769	1.27358e-05
534	5	176509939	179096402	768	205	LTL_EAS	0.00286413	0.00138108
537	6	73924	1452083	513	161	LTL_EAS	0.000117029	0.426225
539	6	2510437	4317569	821	186	LTL_EAS	0.00293944	0.000710549
540	6	4317570	5057821	329	94	LTL_EAS	0.00081454	0.090865
541	6	5057822	6752797	833	219	LTL_EAS	0.00345956	0.00027656
542	6	6752798	7975637	550	161	LTL_EAS	0.00267111	0.00094744
544	6	9020425	10627076	546	152	LTL_EAS	0.00129243	0.0500454
545	6	10627077	12365129	728	187	LTL_EAS	0.00437984	2.94193e-06
546	6	12365130	13835830	522	126	LTL_EAS	5.53181e-06	0.480186
547	6	13835831	15819455	673	180	LTL_EAS	0.00096693	0.122582
548	6	15819456	18404207	922	235	LTL_EAS	0.00375044	0.000154473
550	6	19672633	23199920	1256	281	LTL_EAS	0.00257948	0.0088708
552	6	24397130	26141757	912	179	LTL_EAS	0.00229991	0.00470078
554	6	26697554	28901402	557	54	LTL_EAS	0.00114123	0.0115336
555	6	28901403	29688046	12	5	LTL_EAS	0.000152112	0.130159
558	6	31054924	31571894	131	38	LTL_EAS	0.000698229	0.0434833
559	6	31571895	32682590	105	37	LTL_EAS	0.000507438	0.0942106
560	6	32682591	33209310	191	54	LTL_EAS	0.000609598	0.0944483
561	6	33209311	35757007	840	193	LTL_EAS	0.00176934	0.0240902
562	6	35757008	37112681	522	138	LTL_EAS	0.00204953	0.00452292
565	6	40434092	41712058	529	144	LTL_EAS	0.000993672	0.0931425
566	6	41712059	43728479	550	140	LTL_EAS	0.00119675	0.0559917
567	6	43728480	45405389	505	135	LTL_EAS	0.000258276	0.345724
569	6	46731325	49957253	1072	156	LTL_EAS	0.00300004	0.000243609
570	6	49957254	51171480	236	40	LTL_EAS	3.27866e-05	0.437082
571	6	51171481	52828869	676	140	LTL_EAS	0.000233053	0.360894
572	6	52828870	54293678	636	125	LTL_EAS	0.00217828	0.00205267
573	6	54293679	56105707	648	103	LTL_EAS	7.8595e-05	0.431896
576	6	62693824	64607599	422	56	LTL_EAS	0.000868694	0.0385927
577	6	64607600	65764776	297	61	LTL_EAS	9.98972e-05	0.395113
578	6	65764777	67152226	500	92	LTL_EAS	0.000260571	0.314852
580	6	67906137	70361484	724	119	LTL_EAS	4.71027e-05	0.455022
582	6	71609006	73451673	588	116	LTL_EAS	0.000510056	0.214735
583	6	73451674	74404068	294	86	LTL_EAS	0.000982064	0.0500202
585	6	76627640	77415155	256	56	LTL_EAS	0.000122981	0.372127
586	6	77415156	78385577	336	70	LTL_EAS	0.00151301	0.00438281
587	6	78385578	80691482	753	122	LTL_EAS	0.00113847	0.0532536
588	6	80691483	82389311	545	74	LTL_EAS	0.000462961	0.186029
589	6	82389312	84742341	699	152	LTL_EAS	0.00187441	0.010391
590	6	84742342	87650463	932	146	LTL_EAS	0.000902827	0.114744
591	6	87650464	88857392	367	73	LTL_EAS	0.000128477	0.383343
592	6	88857393	91092352	765	174	LTL_EAS	0.000715594	0.186321
593	6	91092353	92348705	460	121	LTL_EAS	0.00189382	0.00512024
595	6	94329245	96490134	555	113	LTL_EAS	3.09628e-05	0.463601
597	6	98021638	100875516	758	155	LTL_EAS	0.0027516	0.000600055
598	6	100875517	102201824	331	66	LTL_EAS	0.000578121	0.125571
599	6	102201825	104733704	728	136	LTL_EAS	0.000336845	0.30797
600	6	104733705	107240062	886	207	LTL_EAS	0.00206384	0.0136127
601	6	107240063	108858460	476	135	LTL_EAS	0.000193301	0.378998
602	6	108858461	110305071	471	85	LTL_EAS	0.000105807	0.406688
603	6	110305072	112345456	583	125	LTL_EAS	0.00127985	0.0377646
604	6	112345457	114220833	654	144	LTL_EAS	0.000863178	0.123014
605	6	114220834	116703926	598	100	LTL_EAS	0.000662037	0.141197
606	6	116703927	118099644	459	102	LTL_EAS	0.00035838	0.271105
607	6	118099645	120338588	723	128	LTL_EAS	0.00106084	0.0693268
608	6	120338589	122348428	603	105	LTL_EAS	0.0021768	0.00105918
609	6	122348429	124099184	534	113	LTL_EAS	0.000514748	0.209928
610	6	124099185	127540155	870	204	LTL_EAS	0.00179528	0.0253692
611	6	127540156	129860936	467	111	LTL_EAS	0.000229431	0.346942
612	6	129860937	130935711	435	118	LTL_EAS	0.000536659	0.205786
613	6	130935712	132891666	649	146	LTL_EAS	0.000638629	0.19169
614	6	132891667	134243918	572	119	LTL_EAS	0.000373182	0.278576
615	6	134243919	136223664	555	145	LTL_EAS	0.00156686	0.0225441
616	6	136223665	138245745	610	152	LTL_EAS	0.000233074	0.366194
617	6	138245746	139976687	569	169	LTL_EAS	0.003024	0.000334319
618	6	139976688	142288533	512	81	LTL_EAS	0.000307455	0.276498
619	6	142288534	145518030	1089	244	LTL_EAS	0.00039337	0.332211
620	6	145518031	147740272	591	109	LTL_EAS	0.000104489	0.418144
621	6	147740273	150755000	1280	278	LTL_EAS	0.00283211	0.00468698
622	6	150755001	152702385	914	252	LTL_EAS	0.0032466	0.00105584
623	6	152702386	153993093	516	118	LTL_EAS	0.000792697	0.119937
624	6	153993094	157641072	1221	283	LTL_EAS	0.00436342	6.40723e-05
627	6	162169453	164360067	941	216	LTL_EAS	0.00212785	0.0129004
628	6	164360068	166831724	1180	251	LTL_EAS	0.00245415	0.00864778
629	6	166831725	168042468	483	148	LTL_EAS	0.0017967	0.0122198
632	6	169946667	171051270	331	79	LTL_EAS	0.0010621	0.0336826
634	7	1240748	2482290	314	94	LTL_EAS	0.000306449	0.290858
636	7	4142454	5455378	374	146	LTL_EAS	0.00338246	3.51894e-05
639	7	8162909	9034684	409	143	LTL_EAS	0.00124239	0.0515989
640	7	9034685	10882977	768	187	LTL_EAS	0.00166956	0.0287815
641	7	10882978	12635431	925	206	LTL_EAS	0.000715092	0.205577
642	7	12635432	14141608	600	182	LTL_EAS	0.00069182	0.198901
643	7	14141609	15591421	578	174	LTL_EAS	0.00114478	0.0834857
644	7	15591422	16902524	644	166	LTL_EAS	0.00117042	0.0747187
645	7	16902525	18759806	738	224	LTL_EAS	0.000820534	0.184518
646	7	18759807	21715378	1313	300	LTL_EAS	0.00635344	8.33278e-08
647	7	21715379	23472033	853	238	LTL_EAS	0.00307772	0.00135026
648	7	23472034	26552261	1364	292	LTL_EAS	0.00357393	0.000812566
649	7	26552262	28554104	708	168	LTL_EAS	0.00184623	0.0144833
650	7	28554105	31137289	1077	255	LTL_EAS	0.00336649	0.000784684
651	7	31137290	33997077	1156	229	LTL_EAS	0.00581604	3.94229e-08
653	7	36120154	37910002	840	214	LTL_EAS	0.00196812	0.0186492
654	7	37910003	38965629	505	110	LTL_EAS	0.000415738	0.250669
655	7	38965630	40482673	434	90	LTL_EAS	0.00078473	0.0940405
656	7	40482674	41853482	406	101	LTL_EAS	0.000932196	0.0718233
657	7	41853483	43448397	538	148	LTL_EAS	0.0017982	0.0121658
658	7	43448398	45523273	606	136	LTL_EAS	0.000900376	0.107773
659	7	45523274	47104276	603	143	LTL_EAS	0.00208268	0.00453555
661	7	49211849	51674880	944	175	LTL_EAS	0.00284432	0.000746737
662	7	51674881	53176376	686	164	LTL_EAS	0.00224973	0.00412561
663	7	53176377	54905959	648	105	LTL_EAS	0.000171041	0.376675
664	7	54905960	57382764	527	112	LTL_EAS	0.000372057	0.273324
666	7	62560323	63624322	66	16	LTL_EAS	0.000267779	0.137409
667	7	63624323	67371495	801	100	LTL_EAS	0.000469298	0.216114
668	7	67371496	68458764	397	117	LTL_EAS	0.00246424	0.000512003
669	7	68458765	69083424	170	55	LTL_EAS	0.000236693	0.285281
670	7	69083425	71874126	804	186	LTL_EAS	0.00371134	4.30883e-05
671	7	71874127	74408523	294	72	LTL_EAS	0.00129574	0.0117454
673	7	76499313	78460635	817	199	LTL_EAS	0.000277915	0.363201
674	7	78460636	80333322	577	128	LTL_EAS	0.00138677	0.029214
675	7	80333323	81714243	423	133	LTL_EAS	0.00216932	0.00264806
676	7	81714244	83567546	699	169	LTL_EAS	0.00201299	0.00919925
677	7	83567547	85570789	565	95	LTL_EAS	0.000126162	0.398662
678	7	85570790	88189329	720	115	LTL_EAS	0.00149401	0.0170068
679	7	88189330	89727016	582	114	LTL_EAS	0.000713527	0.139183
680	7	89727017	92494245	812	135	LTL_EAS	0.00170235	0.0129267
681	7	92494246	94058818	445	122	LTL_EAS	4.23775e-05	0.458326
682	7	94058819	96432923	771	163	LTL_EAS	0.00162067	0.0247864
683	7	96432924	99365083	751	164	LTL_EAS	0.000262402	0.357266
685	7	100526291	101731498	279	94	LTL_EAS	9.77889e-05	0.416311
687	7	103197912	103793049	325	88	LTL_EAS	0.000580718	0.155865
688	7	103793050	105681590	739	182	LTL_EAS	0.00229787	0.00498743
691	7	109296363	112125631	796	182	LTL_EAS	0.000871653	0.147014
693	7	113714774	116918288	723	135	LTL_EAS	0.000141335	0.406461
694	7	116918289	119074052	481	73	LTL_EAS	0.000549798	0.147229
695	7	119074053	120269171	203	30	LTL_EAS	0.000138494	0.314133
696	7	120269172	122992990	738	137	LTL_EAS	0.00101726	0.0835395
697	7	122992991	125775066	799	118	LTL_EAS	0.00406479	2.59292e-07
698	7	125775067	126869221	386	67	LTL_EAS	5.54527e-05	0.433657
699	7	126869222	129589868	787	151	LTL_EAS	0.00118322	0.0642353
700	7	129589869	131635483	589	166	LTL_EAS	0.00236195	0.00301243
701	7	131635484	133736374	618	143	LTL_EAS	0.00174291	0.0131661
702	7	133736375	136111689	895	197	LTL_EAS	0.00354143	0.0001158
703	7	136111690	138309842	587	172	LTL_EAS	0.00125896	0.0645344
704	7	138309843	139664085	403	125	LTL_EAS	0.00127395	0.0383844
705	7	139664086	141678417	617	134	LTL_EAS	0.00113788	0.0608949
709	7	146397905	147996405	625	147	LTL_EAS	0.000274511	0.3439
711	7	149500993	151627123	693	213	LTL_EAS	0.0015868	0.0438055
713	7	153033739	154964316	741	206	LTL_EAS	0.00167616	0.0340009
714	7	154964317	156153106	442	160	LTL_EAS	0.00111016	0.0813923
715	7	156153107	157635553	521	164	LTL_EAS	0.000740757	0.171839
716	7	157635554	159128575	428	120	LTL_EAS	0.00161589	0.0127211
718	8	720795	1162980	201	85	LTL_EAS	0.000908162	0.0617121
720	8	1957009	2791987	430	158	LTL_EAS	0.000130438	0.418824
721	8	2791988	3361150	410	152	LTL_EAS	0.000843652	0.134035
722	8	3361151	3704713	367	131	LTL_EAS	2.85339e-05	0.467577
723	8	3704714	4480374	733	246	LTL_EAS	0.00158843	0.0547449
725	8	5146928	6142331	798	224	LTL_EAS	0.00270068	0.00314629
727	8	7153080	9099581	469	161	LTL_EAS	0.000969546	0.109879
730	8	11088310	13394643	793	232	LTL_EAS	0.00243138	0.00727865
731	8	13394644	13945976	383	105	LTL_EAS	0.00154617	0.0115667
732	8	13945977	15709611	1080	235	LTL_EAS	0.00121461	0.101986
733	8	15709612	17300379	665	203	LTL_EAS	0.00130998	0.0721622
734	8	17300380	18671055	959	248	LTL_EAS	0.00492732	3.32963e-06
736	8	19221081	21137819	865	232	LTL_EAS	0.00215859	0.0143142
737	8	21137820	21901218	316	115	LTL_EAS	0.000378339	0.27283
738	8	21901219	23028335	390	145	LTL_EAS	0.000841987	0.129239
739	8	23028336	24672501	680	162	LTL_EAS	0.000235959	0.368826
740	8	24672502	25803980	421	103	LTL_EAS	7.23628e-05	0.435788
741	8	25803981	26900699	533	133	LTL_EAS	0.00100978	0.0821363
742	8	26900700	28621013	767	182	LTL_EAS	0.000258363	0.365925
743	8	28621014	30534248	582	151	LTL_EAS	0.00118908	0.0633664
745	8	33044705	34782251	400	62	LTL_EAS	0.000477209	0.160028
746	8	34782252	38017236	548	130	LTL_EAS	0.00126444	0.0420274
747	8	38017237	40054435	551	134	LTL_EAS	0.00253421	0.000708161
748	8	40054436	42472800	773	179	LTL_EAS	0.00178406	0.0197751
749	8	42472801	46841315	123	25	LTL_EAS	0.000119832	0.318785
750	8	46841316	51464550	820	112	LTL_EAS	0.000850226	0.0996498
753	8	54450918	56115358	554	123	LTL_EAS	0.000275573	0.329974
754	8	56115359	57212083	336	88	LTL_EAS	0.000809435	0.0857513
755	8	57212084	59047312	622	138	LTL_EAS	0.00116939	0.058684
757	8	60470381	62328609	602	125	LTL_EAS	0.00145667	0.0227798
759	8	63426173	67414034	1117	197	LTL_EAS	0.00291613	0.00099011
760	8	67414035	69121036	333	76	LTL_EAS	0.000877783	0.0583996
761	8	69121037	72289571	990	219	LTL_EAS	0.00363986	0.000150248
762	8	72289572	73836479	671	141	LTL_EAS	0.000567247	0.213541
763	8	73836480	75684315	684	155	LTL_EAS	0.00173158	0.0164704
764	8	75684316	77379451	540	93	LTL_EAS	6.77017e-05	0.435524
765	8	77379452	79751440	562	94	LTL_EAS	0.000698831	0.12269
766	8	79751441	82016264	632	162	LTL_EAS	0.000601701	0.21622
769	8	85110409	85978701	177	29	LTL_EAS	0.000356002	0.140766
770	8	85978702	87634581	335	51	LTL_EAS	0.000590994	0.0950405
771	8	87634582	89085481	432	86	LTL_EAS	0.000948538	0.0554653
773	8	90639839	94303592	896	179	LTL_EAS	0.00151396	0.0384593
775	8	96205878	99403074	1066	251	LTL_EAS	0.00108347	0.134451
776	8	99403075	102260923	752	118	LTL_EAS	5.7366e-05	0.44878
777	8	102260924	104123443	716	204	LTL_EAS	0.00248011	0.00425806
779	8	107270872	109011379	741	134	LTL_EAS	0.00072515	0.153674
780	8	109011380	115011595	1513	173	LTL_EAS	0.00140441	0.0469244
781	8	115011596	116407568	386	65	LTL_EAS	0.000109419	0.391039
782	8	116407569	121179006	1616	265	LTL_EAS	0.00230462	0.0142028
783	8	121179007	123780420	863	182	LTL_EAS	0.00280108	0.00102632
784	8	123780421	126401023	972	230	LTL_EAS	0.00309572	0.00110678
785	8	126401024	128708975	885	247	LTL_EAS	0.00593544	5.41297e-08
786	8	128708976	130003883	515	149	LTL_EAS	0.000621759	0.199846
787	8	130003884	131959714	787	171	LTL_EAS	0.000861234	0.142651
788	8	131959715	133351162	524	115	LTL_EAS	0.0018848	0.0045213
789	8	133351163	134571618	582	146	LTL_EAS	0.00108147	0.077747
790	8	134571619	137120280	1067	207	LTL_EAS	0.0039599	3.35543e-05
791	8	137120281	139607999	994	196	LTL_EAS	0.000613141	0.232992
792	8	139608000	141104817	767	190	LTL_EAS	0.00269918	0.00170392
794	8	142610657	144214290	465	134	LTL_EAS	0.000859491	0.116142
795	8	144214291	146303867	381	105	LTL_EAS	0.00141893	0.0177317
796	9	10023	1197526	488	150	LTL_EAS	0.00150037	0.0288813
797	9	1197527	2235668	630	199	LTL_EAS	0.00064411	0.224291
798	9	2235669	2696555	270	84	LTL_EAS	0.000750946	0.0960654
799	9	2696556	4320425	674	219	LTL_EAS	0.00155252	0.0492098
800	9	4320426	6144486	636	215	LTL_EAS	0.00229937	0.00821321
801	9	6144487	7759242	766	231	LTL_EAS	0.000965652	0.151079
802	9	7759243	8919319	645	206	LTL_EAS	0.00348616	0.000181547
803	9	8919320	11103346	894	253	LTL_EAS	0.00511507	1.9245e-06
804	9	11103347	12046746	197	44	LTL_EAS	0.000691666	0.0548111
805	9	12046747	14836080	972	289	LTL_EAS	0.00689451	5.87091e-09
807	9	16364352	18259692	699	204	LTL_EAS	0.00340337	0.000229568
808	9	18259693	20288119	807	248	LTL_EAS	0.00431772	3.10381e-05
810	9	21938461	23424761	409	155	LTL_EAS	0.00197349	0.00814041
811	9	23424762	24746694	284	115	LTL_EAS	0.000398855	0.263066
812	9	24746695	25893114	370	146	LTL_EAS	0.000298713	0.331836
813	9	25893115	27748183	675	201	LTL_EAS	0.00254932	0.00331407
814	9	27748184	29938115	855	199	LTL_EAS	0.000807705	0.174483
816	9	31118134	31884883	214	41	LTL_EAS	0.000564938	0.083442
817	9	31884884	33578941	480	118	LTL_EAS	0.00041376	0.258691
818	9	33578942	34701352	240	47	LTL_EAS	0.000750605	0.0472889
820	9	36745893	38717181	677	188	LTL_EAS	0.00297043	0.000672038
821	9	38717182	69989375	13	8	LTL_EAS	0.000441148	0.0198603
822	9	69989376	72513605	494	116	LTL_EAS	0.000152377	0.392988
825	9	75708880	77543688	412	102	LTL_EAS	0.000419306	0.241212
826	9	77543689	79221991	597	184	LTL_EAS	0.00208213	0.00954367
827	9	79221992	81510359	771	205	LTL_EAS	0.000385162	0.321445
828	9	81510360	82682883	425	129	LTL_EAS	0.00289506	0.000136487
829	9	82682884	83713504	403	94	LTL_EAS	0.00020731	0.347929
830	9	83713505	86070382	667	198	LTL_EAS	0.0029955	0.00078242
831	9	86070383	87812366	679	169	LTL_EAS	0.00147252	0.0384494
832	9	87812367	89493523	437	121	LTL_EAS	0.000687579	0.154057
833	9	89493524	92343050	912	214	LTL_EAS	0.00181441	0.0267333
834	9	92343051	94165486	683	182	LTL_EAS	0.00228231	0.00522136
835	9	94165487	96486026	807	148	LTL_EAS	0.0019306	0.00815682
836	9	96486027	98547390	649	143	LTL_EAS	0.000713651	0.164612
838	9	100312285	102281873	665	164	LTL_EAS	0.001008	0.103551
840	9	104225481	105967984	748	146	LTL_EAS	0.00206287	0.00516344
841	9	105967985	107829748	750	138	LTL_EAS	0.00186473	0.0082561
842	9	107829749	110368474	742	177	LTL_EAS	0.00362192	4.45605e-05
843	9	110368475	112864469	1141	258	LTL_EAS	0.00511592	2.27447e-06
844	9	112864470	116400502	1303	264	LTL_EAS	0.00250226	0.00889582
845	9	116400503	119530000	1234	260	LTL_EAS	0.0070577	7.04313e-10
846	9	119530001	122117725	950	223	LTL_EAS	0.00216371	0.0128005
848	9	124681440	126973204	680	164	LTL_EAS	0.00165496	0.0229452
850	9	128927729	130597604	487	119	LTL_EAS	0.000770561	0.127007
851	9	130597605	132047808	279	90	LTL_EAS	0.00151519	0.00874416
852	9	132047809	133641809	376	151	LTL_EAS	0.00412951	1.56157e-06
853	9	133641810	134137629	121	43	LTL_EAS	0.000149512	0.332212
854	9	134137630	134722557	199	50	LTL_EAS	0.000113307	0.373266
855	9	134722558	136612240	598	179	LTL_EAS	0.00119464	0.0778939
857	9	138198538	139575793	265	107	LTL_EAS	0.00100759	0.0629976
858	9	139575794	141144796	267	85	LTL_EAS	4.66798e-05	0.447093
859	10	60523	1523806	431	121	LTL_EAS	0.000240397	0.347131
860	10	1523807	3350441	1191	263	LTL_EAS	0.00732189	2.44492e-10
861	10	3350442	4806512	723	185	LTL_EAS	0.00241672	0.00369247
863	10	5699800	7227267	806	225	LTL_EAS	0.00336928	0.000426865
864	10	7227268	9038946	923	216	LTL_EAS	0.0026425	0.00326026
866	10	10631305	12641986	835	243	LTL_EAS	0.0033588	0.000641029
867	10	12641987	14492886	1086	286	LTL_EAS	0.0026958	0.00712522
868	10	14492887	16679279	838	240	LTL_EAS	0.00433322	2.33951e-05
869	10	16679280	18537267	782	200	LTL_EAS	0.00111934	0.102264
870	10	18537268	20311057	810	183	LTL_EAS	0.00260004	0.00201564
871	10	20311058	22282803	625	151	LTL_EAS	7.27784e-05	0.446696
872	10	22282804	24787658	712	187	LTL_EAS	0.00283679	0.0010242
873	10	24787659	26886615	703	151	LTL_EAS	0.00129059	0.049767
874	10	26886616	28736450	643	134	LTL_EAS	0.00181005	0.00906556
875	10	28736451	30287398	795	206	LTL_EAS	0.00507996	3.37084e-07
876	10	30287399	31908498	543	143	LTL_EAS	0.000103526	0.428897
877	10	31908499	33908655	657	122	LTL_EAS	0.000676857	0.158485
878	10	33908656	35148611	396	86	LTL_EAS	0.000753619	0.0976835
879	10	35148612	36940703	531	117	LTL_EAS	0.000978282	0.0761784
880	10	36940704	43606459	606	102	LTL_EAS	0.00150503	0.012417
881	10	43606460	45448031	705	134	LTL_EAS	0.000216194	0.366661
884	10	50452595	52087335	339	96	LTL_EAS	0.00100064	0.0553858
885	10	52087336	53791679	659	131	LTL_EAS	0.0001579	0.396129
886	10	53791680	55868180	908	196	LTL_EAS	0.0033264	0.000242579
888	10	57129544	59159037	590	68	LTL_EAS	0.000145925	0.366675
889	10	59159038	60514349	396	61	LTL_EAS	0.000235073	0.295697
890	10	60514350	62085190	626	138	LTL_EAS	6.42045e-05	0.448909
891	10	62085191	64198067	734	148	LTL_EAS	0.00181651	0.0115226
892	10	64198068	66313715	634	112	LTL_EAS	0.00252951	0.000317386
893	10	66313716	67549741	474	83	LTL_EAS	0.000949002	0.0526814
894	10	67549742	68757629	620	116	LTL_EAS	0.00157005	0.0135956
895	10	68757630	71054709	656	107	LTL_EAS	0.000619006	0.163592
896	10	71054710	72673145	890	240	LTL_EAS	0.00482013	3.82226e-06
897	10	72673146	73730459	592	187	LTL_EAS	0.00219873	0.00721258
898	10	73730460	75699350	499	63	LTL_EAS	2.52654e-05	0.455848
899	10	75699351	79466701	1220	229	LTL_EAS	0.0057324	5.70133e-08
900	10	79466702	80464093	423	110	LTL_EAS	0.000433982	0.242225
901	10	80464094	82568989	790	201	LTL_EAS	0.00219045	0.00906426
903	10	83992481	85920709	805	151	LTL_EAS	0.00138479	0.0394102
904	10	85920710	87935759	752	149	LTL_EAS	0.00244009	0.00155356
907	10	90787309	92107336	503	119	LTL_EAS	0.000316359	0.306495
908	10	92107337	95362627	976	172	LTL_EAS	0.000144912	0.415224
909	10	95362628	97064851	546	92	LTL_EAS	0.000656486	0.133895
910	10	97064852	100365649	1309	243	LTL_EAS	0.00487574	3.42183e-06
911	10	100365650	102471756	726	119	LTL_EAS	0.00167998	0.0101079
912	10	102471757	106139565	1032	167	LTL_EAS	0.00565715	2.14133e-09
913	10	106139566	107883349	527	91	LTL_EAS	0.00109918	0.0378308
914	10	107883350	110353327	900	186	LTL_EAS	0.0026168	0.00203403
916	10	112170487	115752990	1440	284	LTL_EAS	0.00209174	0.0261929
918	10	117845896	120999638	1243	276	LTL_EAS	0.00561972	6.1289e-07
919	10	120999639	122365962	590	152	LTL_EAS	0.00258416	0.00101057
922	10	124236220	126143063	858	220	LTL_EAS	0.00315902	0.000747756
923	10	126143064	127822235	722	182	LTL_EAS	0.00105106	0.105665
924	10	127822236	129962926	1105	274	LTL_EAS	0.00434358	5.54119e-05
925	10	129962927	130764813	392	140	LTL_EAS	0.00256846	0.000752716
926	10	130764814	131740761	427	119	LTL_EAS	0.000673024	0.156948
927	10	131740762	132689305	493	131	LTL_EAS	0.000833783	0.120274
928	10	132689306	134038000	594	174	LTL_EAS	0.00063667	0.211987
930	10	134609627	135523865	261	54	LTL_EAS	0.000149889	0.348442
931	11	70855	2739889	761	221	LTL_EAS	0.00311888	0.000865132
932	11	2739890	4466102	528	158	LTL_EAS	0.000719209	0.174216
933	11	4466103	6565001	1295	226	LTL_EAS	0.00357938	0.000219661
935	11	7461583	9555470	860	213	LTL_EAS	0.00417004	1.84403e-05
937	11	10371327	12639329	1331	319	LTL_EAS	0.00260175	0.0119881
938	11	12639330	13629455	426	101	LTL_EAS	0.0010451	0.0523545
939	11	13629456	15465638	590	113	LTL_EAS	0.000250651	0.336636
940	11	15465639	17579783	737	142	LTL_EAS	0.000454637	0.259272
942	11	19569433	21205247	855	241	LTL_EAS	0.00167621	0.0446319
944	11	22387441	23673700	475	103	LTL_EAS	0.00167517	0.00697248
947	11	26754939	29492526	781	138	LTL_EAS	0.00119933	0.0544923
949	11	30687491	32062967	351	49	LTL_EAS	0.000844836	0.0342785
951	11	34218654	35442608	662	147	LTL_EAS	0.00045129	0.264143
952	11	35442609	38611205	1105	256	LTL_EAS	0.00467434	1.09645e-05
953	11	38611206	40720444	560	129	LTL_EAS	7.69144e-05	0.440024
954	11	40720445	44785739	1529	264	LTL_EAS	0.00260599	0.00692933
955	11	44785740	47003018	609	158	LTL_EAS	0.000974441	0.106804
956	11	47003019	54695473	511	47	LTL_EAS	0.0011637	0.0074322
958	11	55753844	58455947	904	109	LTL_EAS	0.000645675	0.156316
959	11	58455948	59251804	248	39	LTL_EAS	6.52094e-05	0.403854
960	11	59251805	62201641	871	179	LTL_EAS	0.00508841	8.03553e-08
962	11	63804570	67409718	999	176	LTL_EAS	0.000441731	0.28547
963	11	67409719	69511630	579	149	LTL_EAS	0.000331493	0.318147
964	11	69511631	70926292	426	145	LTL_EAS	0.00050984	0.238794
966	11	72895951	74161461	292	47	LTL_EAS	0.00027746	0.241836
967	11	74161462	76796159	928	208	LTL_EAS	0.0011667	0.0976441
968	11	76796160	79374417	1031	210	LTL_EAS	0.00162135	0.0397098
969	11	79374418	81211602	769	220	LTL_EAS	0.00266947	0.00322257
970	11	81211603	84214592	1071	179	LTL_EAS	0.00190151	0.0145296
971	11	84214593	86425728	791	144	LTL_EAS	0.00162087	0.0190857
972	11	86425729	88282078	793	166	LTL_EAS	0.000145512	0.41344
974	11	90954610	92731401	579	106	LTL_EAS	0.00083444	0.0979184
975	11	92731402	94987750	811	164	LTL_EAS	0.00167243	0.0219132
976	11	94987751	97673784	1026	249	LTL_EAS	0.00353517	0.00042078
977	11	97673785	98704141	411	84	LTL_EAS	0.000996651	0.0461341
978	11	98704142	100417158	810	198	LTL_EAS	0.00159395	0.0381113
979	11	100417159	102156568	580	112	LTL_EAS	0.00136742	0.0238966
980	11	102156569	103493096	567	130	LTL_EAS	0.00129648	0.0385604
982	11	105501640	106254207	209	38	LTL_EAS	0.000782108	0.0296811
984	11	107843999	109178131	342	68	LTL_EAS	0.00162955	0.00236619
986	11	111986913	114123539	908	197	LTL_EAS	0.00306152	0.000614976
987	11	114123540	115428159	493	130	LTL_EAS	0.000414928	0.267772
988	11	115428160	116383543	377	123	LTL_EAS	9.33574e-05	0.429191
989	11	116383544	117901740	680	199	LTL_EAS	0.00154494	0.0428652
990	11	117901741	118900987	363	87	LTL_EAS	0.00186182	0.0019589
991	11	118900988	120771784	701	192	LTL_EAS	0.00119741	0.0842207
995	11	124496120	126773879	946	233	LTL_EAS	0.0028239	0.00256898
997	11	128188778	130049774	795	216	LTL_EAS	0.00212505	0.0129911
998	11	130049775	131429519	567	191	LTL_EAS	0.00668077	5.74332e-11
1000	11	132723636	134204731	640	203	LTL_EAS	0.00123781	0.0831038
1001	11	134204732	134946452	378	120	LTL_EAS	0.000633729	0.171275
1002	12	61107	1739022	484	153	LTL_EAS	0.000343414	0.314909
1003	12	1739023	3562408	702	209	LTL_EAS	0.000339076	0.341352
1004	12	3562409	5198073	821	240	LTL_EAS	0.00195807	0.0244919
1005	12	5198074	6521657	576	161	LTL_EAS	0.00226682	0.00367643
1006	12	6521658	7995249	457	142	LTL_EAS	0.00236497	0.00168156
1007	12	7995250	9032964	126	53	LTL_EAS	4.92783e-05	0.43089
1010	12	11479022	14428647	1216	301	LTL_EAS	0.00809926	5.25733e-11
1011	12	14428648	15819892	420	103	LTL_EAS	0.000589857	0.169987
1012	12	15819893	18628021	781	175	LTL_EAS	0.00167253	0.0250552
1013	12	18628022	20523761	650	182	LTL_EAS	0.00183071	0.0181942
1014	12	20523762	21757656	570	113	LTL_EAS	0.00105864	0.0590901
1015	12	21757657	24562053	913	257	LTL_EAS	0.00330159	0.000982269
1016	12	24562054	26532779	801	191	LTL_EAS	0.00318018	0.000353705
1017	12	26532780	28193227	680	152	LTL_EAS	0.000746757	0.161369
1018	12	28193228	29630824	590	100	LTL_EAS	0.000827145	0.0938758
1019	12	29630825	31158540	799	182	LTL_EAS	0.0012509	0.0707393
1020	12	31158541	32164007	324	106	LTL_EAS	8.42724e-06	0.476551
1021	12	32164008	34339984	791	141	LTL_EAS	0.000342836	0.308256
1022	12	34339985	37856717	18	5	LTL_EAS	2.85881e-07	0.415101
1026	12	43212363	45209544	531	99	LTL_EAS	0.000467872	0.215662
1027	12	45209545	47786056	818	173	LTL_EAS	0.00171673	0.0218551
1028	12	47786057	50165690	682	140	LTL_EAS	0.000267781	0.343627
1029	12	50165691	52569388	701	154	LTL_EAS	0.00116876	0.0681599
1030	12	52569389	54688126	932	189	LTL_EAS	0.00224034	0.00661696
1032	12	56798801	59994970	963	171	LTL_EAS	0.000489993	0.263581
1034	12	61965143	66069782	1304	255	LTL_EAS	0.00236924	0.0110757
1035	12	66069783	68247434	861	197	LTL_EAS	0.00323435	0.000342865
1036	12	68247435	70817279	1083	222	LTL_EAS	0.00996809	7.25299e-18
1037	12	70817280	73150803	701	144	LTL_EAS	0.00118785	0.059541
1039	12	73733755	76517683	860	170	LTL_EAS	0.00196826	0.0106176
1040	12	76517684	78400195	579	136	LTL_EAS	0.000326303	0.312981
1044	12	82916341	84116732	370	83	LTL_EAS	0.000685883	0.113514
1046	12	86138539	89682291	614	118	LTL_EAS	0.000160737	0.38915
1047	12	89682292	92066155	659	121	LTL_EAS	0.00154146	0.0164191
1048	12	92066156	93932579	586	149	LTL_EAS	0.00167313	0.01775
1049	12	93932580	95148195	551	178	LTL_EAS	0.00140583	0.0489033
1050	12	95148196	96440950	647	143	LTL_EAS	0.000633919	0.190984
1051	12	96440951	98579855	905	184	LTL_EAS	0.00276331	0.00121741
1053	12	100780656	103124291	904	189	LTL_EAS	0.00217803	0.0078825
1054	12	103124292	104845403	719	149	LTL_EAS	0.000367539	0.301775
1056	12	106156521	107548626	512	102	LTL_EAS	3.43611e-05	0.459516
1057	12	107548627	109270450	631	138	LTL_EAS	0.000942054	0.0997893
1058	12	109270451	113028429	672	135	LTL_EAS	0.00100493	0.0845139
1060	12	114181110	116184485	1058	257	LTL_EAS	0.00726856	2.24657e-10
1061	12	116184486	117008585	313	102	LTL_EAS	0.000567451	0.177424
1062	12	117008586	118149097	467	153	LTL_EAS	0.00180099	0.0131044
1063	12	118149098	119859279	579	170	LTL_EAS	0.00316971	0.000200895
1064	12	119859280	122015993	654	125	LTL_EAS	0.000604989	0.18614
1066	12	124721970	127195165	1006	262	LTL_EAS	0.00670155	3.88229e-09
1067	12	127195166	128810029	738	218	LTL_EAS	0.00652229	8.09906e-10
1068	12	128810030	130612385	923	288	LTL_EAS	0.00543845	1.79712e-06
1070	12	132015259	133841511	374	104	LTL_EAS	0.00169111	0.00676132
1071	13	19020013	21479583	462	107	LTL_EAS	0.00122451	0.0338797
1072	13	21479584	22386165	204	70	LTL_EAS	0.000183494	0.342177
1073	13	22386166	23326260	383	142	LTL_EAS	0.00245315	0.00122439
1074	13	23326261	24531980	576	168	LTL_EAS	0.000345388	0.321742
1075	13	24531981	25728172	544	156	LTL_EAS	0.00127472	0.0542728
1076	13	25728173	27283456	486	107	LTL_EAS	0.000914523	0.0806679
1077	13	27283457	29435976	798	209	LTL_EAS	0.00253422	0.00395867
1079	13	30625940	32301388	602	180	LTL_EAS	0.00156909	0.0340879
1080	13	32301389	34095663	710	150	LTL_EAS	0.000225586	0.369013
1082	13	35433086	37137641	563	128	LTL_EAS	0.000947014	0.0911084
1084	13	38965014	40859944	775	173	LTL_EAS	0.00107212	0.096192
1085	13	40859945	42118645	363	112	LTL_EAS	0.000839957	0.102162
1086	13	42118646	43701331	651	145	LTL_EAS	0.00137758	0.0374663
1087	13	43701332	45477002	647	165	LTL_EAS	0.0016663	0.0225563
1090	13	49286439	51723601	840	180	LTL_EAS	0.00258348	0.00199489
1095	13	58829327	61392802	875	169	LTL_EAS	0.00136688	0.0493462
1096	13	61392803	63401793	549	115	LTL_EAS	0.000686935	0.148565
1097	13	63401794	65340421	485	78	LTL_EAS	0.000122564	0.391059
1098	13	65340422	67714796	749	137	LTL_EAS	0.000618268	0.191664
1099	13	67714797	69224436	392	84	LTL_EAS	0.00077897	0.08879
1100	13	69224437	71978413	962	212	LTL_EAS	0.00184369	0.0245152
1101	13	71978414	73934089	651	161	LTL_EAS	0.0012556	0.0593657
1102	13	73934090	75806473	597	152	LTL_EAS	0.000548349	0.228858
1103	13	75806474	77411044	748	163	LTL_EAS	0.00140251	0.042836
1105	13	79469557	81726772	701	149	LTL_EAS	0.00255169	0.00104459
1106	13	81726773	85035885	897	156	LTL_EAS	9.97274e-05	0.433823
1107	13	85035886	88190873	903	146	LTL_EAS	0.000453458	0.262553
1109	13	90177955	92913093	859	164	LTL_EAS	8.03199e-05	0.44509
1110	13	92913094	94779284	733	141	LTL_EAS	0.000282733	0.336846
1111	13	94779285	96087870	672	161	LTL_EAS	0.000212111	0.379786
1113	13	97768099	98959258	367	109	LTL_EAS	0.00103418	0.0600841
1114	13	98959259	100633111	758	187	LTL_EAS	0.00147018	0.0457279
1116	13	102104032	104167666	969	208	LTL_EAS	0.0034258	0.000235772
1117	13	104167667	105863276	657	160	LTL_EAS	0.0008888	0.128172
1119	13	107114898	109121210	774	224	LTL_EAS	0.00389978	6.94795e-05
1120	13	109121211	110188241	489	133	LTL_EAS	0.00157216	0.0184662
1121	13	110188242	112137059	945	265	LTL_EAS	0.00215982	0.0195601
1122	13	112137060	113609604	476	155	LTL_EAS	0.000218646	0.374401
1123	13	113609605	115109853	386	110	LTL_EAS	0.000367242	0.273951
1124	14	19002084	21191945	383	143	LTL_EAS	0.00283356	0.000299396
1125	14	21191946	23018665	764	211	LTL_EAS	0.00365622	0.000114492
1126	14	23018666	24905123	623	196	LTL_EAS	0.0151367	7.06253e-35
1127	14	24905124	27533181	980	202	LTL_EAS	0.00150012	0.0484003
1128	14	27533182	29862815	559	120	LTL_EAS	0.000815423	0.11565
1129	14	29862816	32382215	625	150	LTL_EAS	0.00216649	0.00401976
1130	14	32382216	34815856	1062	304	LTL_EAS	0.00704403	5.9752e-09
1131	14	34815857	35858508	265	54	LTL_EAS	0.000292303	0.246024
1132	14	35858509	40256601	1490	247	LTL_EAS	0.00508686	1.73921e-06
1134	14	40342048	43066701	880	132	LTL_EAS	0.000242079	0.352352
1135	14	43066702	43802046	196	58	LTL_EAS	0.00050275	0.141574
1137	14	46081717	47458806	370	63	LTL_EAS	0.000725492	0.0757304
1138	14	47458807	49956535	787	165	LTL_EAS	0.000684741	0.190094
1139	14	49956536	52048393	721	186	LTL_EAS	0.00284509	0.000973806
1140	14	52048394	53474136	569	135	LTL_EAS	0.000171026	0.390685
1141	14	53474137	53997290	179	48	LTL_EAS	0.000105137	0.377848
1142	14	53997291	55234112	478	142	LTL_EAS	0.00132628	0.0412932
1143	14	55234113	56216787	285	65	LTL_EAS	0.000874659	0.0473594
1144	14	56216788	57481315	662	166	LTL_EAS	0.000657875	0.199603
1146	14	59448879	62043302	827	153	LTL_EAS	0.00151887	0.0285655
1147	14	62043303	63291421	458	127	LTL_EAS	0.000248628	0.346267
1149	14	65225453	67889283	878	139	LTL_EAS	0.00104747	0.0792438
1150	14	67889284	71102397	1172	239	LTL_EAS	0.00339905	0.000523145
1151	14	71102398	72890154	696	141	LTL_EAS	0.00116768	0.0607145
1152	14	72890155	74832030	652	152	LTL_EAS	0.0028689	0.000352952
1153	14	74832031	77605473	954	228	LTL_EAS	0.00369129	0.000158558
1154	14	77605474	78561980	459	103	LTL_EAS	0.000309018	0.297674
1155	14	78561981	81000021	920	210	LTL_EAS	0.00142507	0.0599699
1157	14	83137834	84092007	341	101	LTL_EAS	7.56039e-05	0.433117
1158	14	84092008	85568114	408	103	LTL_EAS	7.67448e-05	0.433051
1160	14	87635080	89411185	598	123	LTL_EAS	0.00154262	0.0169748
1161	14	89411186	91618007	746	214	LTL_EAS	0.000540565	0.26724
1162	14	91618008	92916399	460	122	LTL_EAS	0.00215288	0.00206439
1163	14	92916400	94325285	518	157	LTL_EAS	0.00303026	0.000224207
1164	14	94325286	95947052	855	241	LTL_EAS	0.00252427	0.00643503
1165	14	95947053	97572724	789	216	LTL_EAS	0.00508888	5.0908e-07
1166	14	97572725	99370326	702	171	LTL_EAS	0.00161463	0.0276868
1167	14	99370327	101357468	702	209	LTL_EAS	0.0017295	0.0309694
1171	14	106339118	107289454	26	8	LTL_EAS	0.000234006	0.0987006
1172	15	20001200	24979404	314	110	LTL_EAS	0.000324901	0.295241
1173	15	24979405	27298112	787	251	LTL_EAS	0.00242747	0.00922711
1174	15	27298113	28604617	435	122	LTL_EAS	0.00146742	0.0209788
1175	15	28604618	30435204	391	109	LTL_EAS	0.00046994	0.22512
1177	15	32197743	34016007	687	197	LTL_EAS	0.0034954	0.000136778
1179	15	35038012	37456726	841	218	LTL_EAS	0.00387522	6.39885e-05
1181	15	38531453	40384324	773	195	LTL_EAS	0.00317604	0.000397904
1182	15	40384325	41798467	300	80	LTL_EAS	0.00155456	0.00542495
1183	15	41798468	42910414	320	86	LTL_EAS	0.000892269	0.065712
1185	15	45095317	46666511	365	88	LTL_EAS	0.000143996	0.383245
1186	15	46666512	48365228	624	141	LTL_EAS	0.00118943	0.0575868
1188	15	50008044	51678516	575	105	LTL_EAS	0.00264183	0.000139482
1189	15	51678517	53699684	675	168	LTL_EAS	0.00108321	0.0910952
1190	15	53699685	55823743	922	214	LTL_EAS	0.00417608	1.86296e-05
1192	15	56865256	58828306	890	236	LTL_EAS	0.00344923	0.000420102
1194	15	59909706	61292486	577	181	LTL_EAS	0.00330937	0.000167836
1195	15	61292487	63015122	761	207	LTL_EAS	0.00266563	0.00261576
1196	15	63015123	64339748	442	141	LTL_EAS	0.000613742	0.196504
1197	15	64339749	67468817	914	212	LTL_EAS	0.000739175	0.20153
1198	15	67468818	68891518	482	94	LTL_EAS	0.000604814	0.154247
1199	15	68891519	72047167	1090	255	LTL_EAS	0.0027552	0.0042604
1201	15	73628715	76398691	670	151	LTL_EAS	0.00159413	0.0227474
1203	15	78516010	80638744	832	215	LTL_EAS	0.00093402	0.150405
1204	15	80638745	84260703	915	228	LTL_EAS	7.96855e-05	0.453719
1205	15	84260704	86652259	785	172	LTL_EAS	0.00156819	0.0314275
1206	15	86652260	88370262	798	214	LTL_EAS	0.00178935	0.0283038
1207	15	88370263	90070118	540	191	LTL_EAS	0.00187027	0.0183413
1208	15	90070119	92011845	651	170	LTL_EAS	0.00186306	0.0142308
1209	15	92011846	93591318	740	225	LTL_EAS	0.0030542	0.00114103
1210	15	93591319	94922391	654	234	LTL_EAS	0.00232617	0.00973098
1211	15	94922392	96473837	639	203	LTL_EAS	0.00255849	0.00333999
1212	15	96473838	98030720	541	188	LTL_EAS	0.00445926	2.18877e-06
1213	15	98030721	100290016	993	261	LTL_EAS	0.00429677	4.70589e-05
1217	16	2410641	4046570	360	133	LTL_EAS	0.000745273	0.146716
1218	16	4046571	5117847	289	114	LTL_EAS	0.000112576	0.41518
1219	16	5117848	5855102	310	112	LTL_EAS	0.00190103	0.00392141
1220	16	5855103	6893427	619	219	LTL_EAS	0.00228879	0.00889564
1222	16	7604977	8961640	734	216	LTL_EAS	0.00265747	0.00312401
1223	16	8961641	10868121	827	223	LTL_EAS	0.00514224	5.4872e-07
1224	16	10868122	12612116	646	181	LTL_EAS	0.0044433	1.70694e-06
1225	16	12612117	13154643	307	96	LTL_EAS	0.000461286	0.215295
1226	16	13154644	14470775	484	137	LTL_EAS	0.00145853	0.0271872
1227	16	14470776	16960200	405	97	LTL_EAS	3.77179e-05	0.456294
1228	16	16960201	18102736	377	122	LTL_EAS	0.000422784	0.257918
1230	16	20151007	21499397	306	78	LTL_EAS	0.000310114	0.271374
1231	16	21499398	24309956	634	169	LTL_EAS	0.00155199	0.0316591
1232	16	24309957	25725416	427	111	LTL_EAS	0.000138763	0.398632
1233	16	25725417	27795175	720	226	LTL_EAS	0.00613828	7.8919e-09
1234	16	27795176	29698606	304	97	LTL_EAS	0.00236095	0.000338847
1235	16	29698607	32703171	335	62	LTL_EAS	0.000114017	0.385003
1237	16	49008734	51214363	731	191	LTL_EAS	0.00232922	0.00530236
1238	16	51214364	54450244	1130	243	LTL_EAS	0.00483098	4.06103e-06
1239	16	54450245	56907578	1032	248	LTL_EAS	0.00330156	0.000836675
1240	16	56907579	58867358	785	221	LTL_EAS	0.00213306	0.0134919
1241	16	58867359	60746327	574	155	LTL_EAS	0.00171776	0.0171194
1244	16	63691590	66398031	943	199	LTL_EAS	0.00162592	0.0357756
1245	16	66398032	69541877	607	100	LTL_EAS	0.0013303	0.0213865
1246	16	69541878	73543801	922	203	LTL_EAS	0.00266291	0.0024537
1247	16	73543802	74971511	398	156	LTL_EAS	0.00269574	0.000756791
1249	16	76275795	77523907	589	141	LTL_EAS	6.13936e-05	0.450969
1250	16	77523908	78865571	919	251	LTL_EAS	0.00249567	0.00781098
1251	16	78865572	80297074	953	278	LTL_EAS	0.00236192	0.0140951
1252	16	80297075	81432839	599	187	LTL_EAS	0.000391345	0.311291
1253	16	81432840	82747943	705	232	LTL_EAS	0.0031496	0.000977333
1255	16	83612986	84445738	597	222	LTL_EAS	0.003025	0.00117705
1256	16	84445739	85374253	520	220	LTL_EAS	0.00179871	0.0292532
1257	16	85374254	86981136	811	292	LTL_EAS	0.00505324	7.97355e-06
1258	16	86981137	88704477	531	191	LTL_EAS	0.00129662	0.0684987
1259	16	88704478	90292812	398	144	LTL_EAS	0.00120268	0.0574473
1260	17	56	1173001	298	134	LTL_EAS	0.00192717	0.00620542
1261	17	1173002	2632816	440	136	LTL_EAS	0.000769425	0.142106
1263	17	3591296	5574965	593	168	LTL_EAS	0.00132919	0.0533377
1264	17	5574966	6634094	490	167	LTL_EAS	0.00241387	0.00260432
1265	17	6634095	9312566	785	233	LTL_EAS	0.00236757	0.008669
1266	17	9312567	10575138	474	170	LTL_EAS	0.00274433	0.000927744
1267	17	10575139	12534588	623	190	LTL_EAS	0.00163166	0.0324553
1269	17	13464481	14215665	312	119	LTL_EAS	0.000222695	0.355455
1270	17	14215666	15280576	509	160	LTL_EAS	0.000330533	0.324374
1271	17	15280577	16437685	235	62	LTL_EAS	0.000187754	0.330136
1272	17	16437686	18853178	554	111	LTL_EAS	0.00184714	0.00464487
1273	17	18853179	21285188	373	84	LTL_EAS	0.000434268	0.213452
1276	17	29266627	31695393	618	168	LTL_EAS	0.00146245	0.0389958
1278	17	32911705	34395061	458	130	LTL_EAS	0.000288646	0.327682
1279	17	34395062	36495389	423	120	LTL_EAS	0.00224184	0.00138416
1280	17	36495390	38649589	433	108	LTL_EAS	0.000565353	0.184633
1282	17	39900529	43932381	843	148	LTL_EAS	0.00131933	0.0449401
1283	17	43932382	45880185	256	46	LTL_EAS	0.000391231	0.169996
1284	17	45880186	49895548	1230	262	LTL_EAS	0.00430637	4.67261e-05
1285	17	49895549	51665573	586	86	LTL_EAS	0.000623815	0.137657
1286	17	51665574	53597456	633	157	LTL_EAS	0.00144377	0.0363229
1287	17	53597457	55680273	692	181	LTL_EAS	0.00278464	0.00105881
1290	17	59650642	63102444	596	111	LTL_EAS	0.00164626	0.00944961
1291	17	63102445	64800166	646	145	LTL_EAS	0.00166815	0.0169311
1292	17	64800167	67858770	832	229	LTL_EAS	0.00101052	0.139765
1293	17	67858771	69546299	664	158	LTL_EAS	0.00140099	0.0408384
1294	17	69546300	72789312	1178	327	LTL_EAS	0.00469453	5.83483e-05
1295	17	72789313	75392712	794	209	LTL_EAS	0.00210675	0.0125102
1296	17	75392713	77326228	731	265	LTL_EAS	0.00533123	1.26872e-06
1297	17	77326229	79044911	532	168	LTL_EAS	0.000267126	0.356719
1298	17	79044912	81194908	439	115	LTL_EAS	0.000355137	0.284116
1299	18	10644	2405380	779	209	LTL_EAS	0.005477	6.66881e-08
1300	18	2405381	3542107	412	131	LTL_EAS	0.00124187	0.0451678
1301	18	3542108	5154578	522	189	LTL_EAS	0.00233653	0.00502142
1302	18	5154579	7133194	776	227	LTL_EAS	0.00432095	1.64618e-05
1303	18	7133195	8467004	483	156	LTL_EAS	0.00185773	0.0116701
1304	18	8467005	10845313	1067	292	LTL_EAS	0.00218539	0.0229768
1305	18	10845314	12024368	337	114	LTL_EAS	1.2261e-05	0.475073
1306	18	12024369	14439639	660	169	LTL_EAS	0.000503369	0.257205
1309	18	20790477	22895523	746	189	LTL_EAS	0.00202936	0.0118251
1310	18	22895524	24025116	391	106	LTL_EAS	0.00212702	0.00134778
1312	18	25760878	27429487	441	85	LTL_EAS	0.000637905	0.131537
1313	18	27429488	29368667	756	176	LTL_EAS	0.000516372	0.256367
1315	18	31424984	33794596	591	127	LTL_EAS	0.00141432	0.0266029
1316	18	33794597	35838351	710	159	LTL_EAS	0.00137759	0.0436917
1317	18	35838352	36979961	344	76	LTL_EAS	0.000190564	0.343344
1320	18	40990735	42921886	622	151	LTL_EAS	0.00138684	0.0392059
1321	18	42921887	44155069	508	122	LTL_EAS	0.000671384	0.160294
1322	18	44155070	46208355	768	196	LTL_EAS	0.00233068	0.00572414
1323	18	46208356	47730999	632	172	LTL_EAS	0.000516383	0.254013
1324	18	47731000	51061437	1224	246	LTL_EAS	0.00546124	3.76366e-07
1327	18	54958665	57377707	1092	255	LTL_EAS	0.00315518	0.0014427
1329	18	58232804	60278229	716	166	LTL_EAS	0.00118418	0.0725223
1330	18	60278230	61818997	505	117	LTL_EAS	0.00245942	0.000522296
1331	18	61818998	62898666	379	86	LTL_EAS	0.000900398	0.0641418
1333	18	65106562	66205923	520	129	LTL_EAS	0.000388707	0.278947
1334	18	66205924	68813477	838	219	LTL_EAS	0.00223548	0.010198
1336	18	70096917	72982759	1183	281	LTL_EAS	0.00592711	2.21593e-07
1338	18	74459355	75975853	706	210	LTL_EAS	0.00105839	0.119666
1339	18	75975854	77149289	364	103	LTL_EAS	0.000697241	0.133085
1343	19	1347382	3179690	402	167	LTL_EAS	0.00261233	0.00135123
1344	19	3179691	5377037	513	196	LTL_EAS	0.00415893	1.05595e-05
1345	19	5377038	6893560	337	139	LTL_EAS	0.00164693	0.0163545
1346	19	6893561	9016693	516	193	LTL_EAS	0.00522311	9.25946e-08
1349	19	11849450	12500149	130	27	LTL_EAS	0.000191177	0.254572
1350	19	12500150	15648148	662	208	LTL_EAS	0.000696353	0.212449
1351	19	15648149	16749208	444	83	LTL_EAS	0.000627012	0.132688
1352	19	16749209	20221313	913	225	LTL_EAS	0.00311793	0.000939821
1355	19	23466055	27741111	156	33	LTL_EAS	0.000166753	0.295386
1356	19	27741112	29789974	663	137	LTL_EAS	0.000689209	0.167551
1358	19	30600793	32440024	463	138	LTL_EAS	0.00174218	0.0120851
1359	19	32440025	34205226	587	163	LTL_EAS	0.00231077	0.00333127
1360	19	34205227	36468278	659	194	LTL_EAS	0.00116444	0.0908841
1365	19	43862456	45579043	590	155	LTL_EAS	0.00291802	0.000322508
1366	19	45579044	47334409	486	161	LTL_EAS	0.00400421	4.61437e-06
1367	19	47334410	49093112	485	132	LTL_EAS	0.00259221	0.000528355
1368	19	49093113	51334271	557	179	LTL_EAS	0.0030291	0.000435621
1369	19	51334272	52985347	671	198	LTL_EAS	0.00179846	0.0236761
1370	19	52985348	54734184	402	164	LTL_EAS	0.00174504	0.0180458
1371	19	54734185	55660892	252	105	LTL_EAS	0.00236578	0.000476619
1372	19	55660893	57195058	574	206	LTL_EAS	0.00461188	2.46734e-06
1373	19	57195059	59118839	707	165	LTL_EAS	0.00026477	0.356583
1374	20	60479	2244039	916	257	LTL_EAS	0.00604189	5.34251e-08
1375	20	2244040	3147024	363	107	LTL_EAS	0.00135606	0.0225906
1376	20	3147025	5415568	874	239	LTL_EAS	0.00617192	1.32161e-08
1377	20	5415569	6669967	506	143	LTL_EAS	0.00139852	0.0346223
1378	20	6669968	8602105	820	194	LTL_EAS	0.00122955	0.0800098
1381	20	11014705	12154278	502	117	LTL_EAS	0.00141688	0.0224273
1382	20	12154279	13689325	655	165	LTL_EAS	0.00250192	0.0018662
1383	20	13689326	15543676	709	150	LTL_EAS	0.00138016	0.0394296
1384	20	15543677	17753799	1265	272	LTL_EAS	0.00292392	0.00344981
1385	20	17753800	19110601	555	129	LTL_EAS	0.000626733	0.181892
1386	20	19110602	21683223	1086	224	LTL_EAS	0.00254313	0.00486005
1387	20	21683224	22740664	350	70	LTL_EAS	0.00106412	0.0269861
1388	20	22740665	24060965	572	131	LTL_EAS	0.00130686	0.0379823
1391	20	34960773	36954724	446	103	LTL_EAS	0.00200085	0.0020127
1392	20	36954725	39083843	703	149	LTL_EAS	0.00285484	0.000337739
1393	20	39083844	41198420	823	205	LTL_EAS	0.00147111	0.0526513
1395	20	43060138	44814232	652	143	LTL_EAS	0.00307858	0.000111624
1396	20	44814233	47198830	961	257	LTL_EAS	0.00411016	7.9622e-05
1397	20	47198831	49239658	768	173	LTL_EAS	0.000102183	0.435954
1398	20	49239659	52472372	1227	294	LTL_EAS	0.00763203	3.0106e-10
1400	20	54142342	56512594	1011	259	LTL_EAS	0.00333359	0.000927131
1401	20	56512595	58104565	642	192	LTL_EAS	0.00195248	0.0150492
1402	20	58104566	60242140	929	235	LTL_EAS	0.00353871	0.000309101
1403	20	60242141	60765010	170	65	LTL_EAS	0.000675202	0.0921996
1404	20	60765011	62189093	411	141	LTL_EAS	0.0018202	0.0100534
1405	20	62189094	62965163	170	58	LTL_EAS	0.0022226	5.36083e-05
1406	21	9411243	15842927	205	53	LTL_EAS	0.000112631	0.377258
1407	21	15842928	17889943	635	186	LTL_EAS	0.00127534	0.069142
1409	21	19332407	21056780	602	175	LTL_EAS	0.000154245	0.41153
1410	21	21056781	22883608	660	184	LTL_EAS	0.00163236	0.0305138
1411	21	22883609	25333578	888	191	LTL_EAS	0.00172938	0.0259805
1412	21	25333579	26470748	467	111	LTL_EAS	0.000337986	0.289397
1413	21	26470749	29125075	1089	260	LTL_EAS	0.00487181	6.03288e-06
1415	21	30846396	32814465	678	144	LTL_EAS	0.000777696	0.146137
1416	21	32814466	35407943	913	226	LTL_EAS	0.00190243	0.024465
1417	21	35407944	36355773	313	121	LTL_EAS	0.00140752	0.0246813
1419	21	38040882	39830620	708	170	LTL_EAS	0.00160283	0.0281977
1420	21	39830621	41389310	859	204	LTL_EAS	0.00323563	0.000406708
1421	21	41389311	43321528	927	266	LTL_EAS	0.00631012	2.54387e-08
1423	21	44504006	46176127	517	150	LTL_EAS	0.0016011	0.0220112
1425	21	47031782	48119752	356	73	LTL_EAS	0.00105209	0.030404
1426	22	16050408	17581547	68	26	LTL_EAS	0.000418955	0.0978917
1427	22	17581548	18557031	375	145	LTL_EAS	0.00229212	0.00234657
1428	22	18557032	19912242	437	110	LTL_EAS	0.00147278	0.0164854
1429	22	19912243	21986827	503	114	LTL_EAS	0.000493147	0.219932
1431	22	23398338	25209349	492	123	LTL_EAS	0.00224697	0.00149353
1432	22	25209350	26524344	434	133	LTL_EAS	0.000459119	0.250715
1433	22	26524345	28233390	997	282	LTL_EAS	0.00341154	0.00108703
1434	22	28233391	30954397	730	140	LTL_EAS	0.000641664	0.185913
1435	22	30954398	32665507	475	110	LTL_EAS	0.000613057	0.168836
1436	22	32665508	34860926	988	215	LTL_EAS	0.00250495	0.00472058
1438	22	36453609	37977990	615	185	LTL_EAS	0.00334282	0.000167399
1439	22	37977991	40527060	630	157	LTL_EAS	0.00168282	0.019402
1440	22	40527061	42690818	475	63	LTL_EAS	0.000107179	0.391117
1441	22	42690819	44994946	943	240	LTL_EAS	0.00201694	0.0214938
1442	22	44994947	46915049	599	209	LTL_EAS	0.0037607	7.44152e-05
1443	22	46915050	48212129	491	132	LTL_EAS	0.000256219	0.345147
1444	22	48212130	49800746	909	278	LTL_EAS	0.00756193	1.81634e-10
1445	22	49800747	51243298	411	142	LTL_EAS	0.00156506	0.0216916
1	1	10583	1976558	163	49	AF_EAS	0.000437336	0.063251
2	1	1976559	3492739	399	147	AF_EAS	0.00143982	0.00221808
3	1	3492740	4543012	363	123	AF_EAS	0.00196159	1.30599e-05
4	1	4543013	5914790	677	207	AF_EAS	0.0036121	4.59404e-09
5	1	5914791	7365002	509	137	AF_EAS	0.000635067	0.0759549
6	1	7365003	9002909	466	143	AF_EAS	0.00152895	0.00115334
7	1	9002910	10755520	475	145	AF_EAS	0.00322677	1.68977e-09
8	1	10755521	11708678	243	103	AF_EAS	0.00210711	4.03274e-06
9	1	11708679	13811000	358	120	AF_EAS	0.000958851	0.0140859
10	1	13811001	14893157	539	179	AF_EAS	0.0033195	1.85865e-08
11	1	14893158	17875820	937	219	AF_EAS	0.00382029	7.40211e-10
12	1	17875821	20304720	1045	286	AF_EAS	0.00664401	1.18776e-17
13	1	20304721	22145806	570	160	AF_EAS	0.00384521	9.73808e-12
14	1	22145807	23916165	585	161	AF_EAS	0.0022343	4.48717e-05
15	1	23916166	25516893	491	140	AF_EAS	0.00211653	1.16665e-05
16	1	25516894	27400828	389	81	AF_EAS	0.00165232	1.3446e-05
17	1	27400829	30161897	546	108	AF_EAS	0.00167654	0.000110593
18	1	30161898	32043093	848	213	AF_EAS	0.00222454	6.0752e-05
19	1	32043094	34941267	873	211	AF_EAS	0.00293837	1.98196e-07
20	1	34941268	36857533	414	93	AF_EAS	0.00123838	0.000856538
21	1	36857534	39550621	851	221	AF_EAS	0.00388949	2.43912e-11
22	1	39550622	41288115	494	116	AF_EAS	0.000411542	0.159075
23	1	41288116	43366279	637	132	AF_EAS	0.00250067	7.27185e-07
24	1	43366280	45082440	578	130	AF_EAS	0.00133873	0.00177782
25	1	45082441	47651005	637	95	AF_EAS	0.000609079	0.0426059
26	1	47651006	50644820	866	165	AF_EAS	0.000704717	0.0664294
27	1	50644821	54973025	986	201	AF_EAS	0.00406732	1.37575e-10
28	1	54973026	56412729	620	161	AF_EAS	0.00264763	2.074e-07
29	1	56412730	57021655	279	64	AF_EAS	0.000144931	0.289041
30	1	57021656	58196478	560	128	AF_EAS	0.00012318	0.271119
31	1	58196479	59188245	531	120	AF_EAS	0.00071658	0.0351735
33	1	60232863	62109988	667	183	AF_EAS	0.00238515	2.06563e-06
34	1	62109989	64095111	694	158	AF_EAS	0.00243962	1.15976e-05
35	1	64095112	65041376	306	82	AF_EAS	0.000760458	0.0162511
36	1	65041377	66774011	643	136	AF_EAS	0.00174766	0.000270259
37	1	66774012	68477862	718	139	AF_EAS	0.00166223	0.000629715
38	1	68477863	69687902	389	98	AF_EAS	0.000353887	0.165635
39	1	69687903	72285466	714	150	AF_EAS	0.00203794	2.39146e-05
40	1	72285467	74327078	489	69	AF_EAS	0.000662696	0.0251155
41	1	74327079	76728120	724	122	AF_EAS	0.00186386	3.9445e-05
42	1	76728121	79112109	754	154	AF_EAS	0.0021296	3.14143e-05
43	1	79112110	80341732	449	83	AF_EAS	0.000400867	0.123493
44	1	80341733	81990569	610	156	AF_EAS	0.00110007	0.00780301
45	1	81990570	83991644	620	129	AF_EAS	0.00132423	0.00189626
46	1	83991645	86012417	805	157	AF_EAS	0.00407764	3.59247e-13
47	1	86012418	88408033	877	177	AF_EAS	0.00225983	2.01547e-05
48	1	88408034	90066205	485	105	AF_EAS	0.00033127	0.180678
49	1	90066206	92938314	920	176	AF_EAS	0.00127033	0.00771395
50	1	92938315	93568956	113	16	AF_EAS	0.000203296	0.113113
51	1	93568957	96151207	952	196	AF_EAS	0.0036436	1.77822e-10
52	1	96151208	97949735	656	110	AF_EAS	0.00122785	0.00249278
53	1	97949736	99555996	415	72	AF_EAS	0.000643058	0.025749
54	1	99555997	101849109	785	157	AF_EAS	0.00364311	1.36229e-11
55	1	101849110	102644327	288	62	AF_EAS	0.000478108	0.0803801
56	1	102644328	105413133	637	106	AF_EAS	0.000539991	0.0736036
58	1	106767765	110304092	1055	211	AF_EAS	0.00344818	2.82392e-08
59	1	110304093	112347256	859	206	AF_EAS	0.00334258	1.47209e-08
60	1	112347257	114872038	790	179	AF_EAS	0.00278733	3.12341e-07
61	1	114872039	118104015	1060	209	AF_EAS	0.00225668	4.70126e-05
62	1	118104016	142545956	894	162	AF_EAS	0.00105347	0.0163201
63	1	142545957	147914609	458	91	AF_EAS	0.000973545	0.00737069
64	1	147914610	152537155	637	113	AF_EAS	0.00192551	2.05309e-05
65	1	152537156	153397055	384	59	AF_EAS	0.000841218	0.00502527
66	1	153397056	156616039	777	154	AF_EAS	0.00272559	1.31735e-06
67	1	156616040	157982579	542	136	AF_EAS	0.00126484	0.0025964
68	1	157982580	159953315	691	160	AF_EAS	0.00177083	0.000386891
69	1	159953316	162888864	1206	244	AF_EAS	0.00322525	5.81738e-07
70	1	162888865	164954020	837	191	AF_EAS	0.000795865	0.0509244
71	1	164954021	168175845	1338	264	AF_EAS	0.00432576	1.65187e-10
72	1	168175846	170169621	766	150	AF_EAS	0.00189447	8.50663e-05
73	1	170169622	172932966	981	154	AF_EAS	0.0051758	1.86414e-17
75	1	175387680	177937441	858	160	AF_EAS	0.00419379	7.61726e-13
76	1	177937442	181116840	1094	164	AF_EAS	0.00130195	0.0107072
77	1	181116841	183553326	896	165	AF_EAS	0.0022104	1.78067e-05
78	1	183553327	185513153	749	134	AF_EAS	0.00319319	9.4188e-10
79	1	185513154	187902801	714	133	AF_EAS	0.00204717	1.61801e-05
80	1	187902802	189761326	459	51	AF_EAS	0.000661444	0.0184221
81	1	189761327	191285922	573	76	AF_EAS	0.000418834	0.0954808
82	1	191285923	192349898	287	50	AF_EAS	0.000868629	0.00139469
83	1	192349899	194108441	459	93	AF_EAS	0.000948105	0.0061663
84	1	194108442	195996764	538	83	AF_EAS	0.00107117	0.00377795
85	1	195996765	198541162	623	94	AF_EAS	0.000778736	0.0184813
86	1	198541163	201071502	840	167	AF_EAS	0.00355343	2.71872e-10
87	1	201071503	203648600	1061	271	AF_EAS	0.00753453	1.67713e-24
88	1	203648601	205271007	682	153	AF_EAS	0.00183455	0.00020341
89	1	205271008	208809070	1041	246	AF_EAS	0.00371825	1.61854e-08
90	1	208809071	209837236	447	129	AF_EAS	0.0013267	0.00249006
91	1	209837237	212344930	967	200	AF_EAS	0.00103787	0.029494
92	1	212344931	213936674	528	125	AF_EAS	0.000746008	0.0460012
93	1	213936675	216245665	918	170	AF_EAS	0.00103593	0.0128448
94	1	216245666	218342976	883	181	AF_EAS	0.00284673	2.41783e-07
95	1	218342977	220125116	651	138	AF_EAS	0.00295816	7.759e-09
96	1	220125117	221151629	336	94	AF_EAS	0.000897575	0.00883039
97	1	221151630	223654495	793	181	AF_EAS	0.00308907	1.50746e-07
98	1	223654496	225965358	739	141	AF_EAS	0.00123419	0.00519629
99	1	225965359	228102732	774	166	AF_EAS	0.00133547	0.0036719
100	1	228102733	230437262	789	180	AF_EAS	0.00221193	1.93738e-05
101	1	230437263	232090252	747	184	AF_EAS	0.00229253	1.66104e-05
102	1	232090253	233369741	575	165	AF_EAS	0.0018569	0.000195148
103	1	233369742	234839043	672	175	AF_EAS	0.00243765	6.44829e-06
104	1	234839044	236202705	331	87	AF_EAS	0.000613081	0.043111
105	1	236202706	237419495	559	145	AF_EAS	0.00175964	0.000246407
106	1	237419496	238922341	678	171	AF_EAS	0.00227119	2.38991e-05
107	1	238922342	239566655	218	56	AF_EAS	0.000806251	0.00747496
108	1	239566656	241169137	698	189	AF_EAS	0.00347611	1.84938e-08
109	1	241169138	242420888	569	181	AF_EAS	0.00300296	2.40696e-07
110	1	242420889	244512787	643	168	AF_EAS	0.00323514	1.16439e-08
111	1	244512788	245966754	477	161	AF_EAS	0.00235917	3.58722e-06
112	1	245966755	247344630	505	120	AF_EAS	0.00153543	0.000225073
113	1	247344631	249239466	425	112	AF_EAS	0.000639382	0.0419449
114	2	10133	2645948	954	220	AF_EAS	0.00572099	1.77813e-15
115	2	2645949	4015665	605	176	AF_EAS	0.00153724	0.0012628
116	2	4015666	5529462	447	124	AF_EAS	0.00169551	0.000171083
117	2	5529463	6967943	616	163	AF_EAS	0.00181502	0.000162916
118	2	6967944	8233381	504	130	AF_EAS	0.00171171	0.000210429
119	2	8233382	10083949	539	158	AF_EAS	0.00367274	7.2381e-11
120	2	10083950	12419387	956	260	AF_EAS	0.00334282	1.35169e-07
121	2	12419388	14757213	774	173	AF_EAS	0.00238165	9.35051e-06
122	2	14757214	16549757	587	164	AF_EAS	0.00038963	0.173028
123	2	16549758	17515331	319	80	AF_EAS	5.16444e-05	0.381877
124	2	17515332	19692796	810	191	AF_EAS	0.00369345	1.50317e-08
125	2	19692797	20402938	396	97	AF_EAS	0.00123793	0.00135831
126	2	20402939	23703344	991	237	AF_EAS	0.00464165	9.12269e-12
127	2	23703345	26209579	586	120	AF_EAS	0.00262419	2.13743e-08
128	2	26209580	29456860	926	179	AF_EAS	0.00180137	0.000512412
129	2	29456861	31111554	737	184	AF_EAS	0.00458651	4.32751e-15
130	2	31111555	33363144	640	161	AF_EAS	0.000518612	0.106166
131	2	33363145	34016909	272	93	AF_EAS	0.00171082	2.16724e-05
132	2	34016910	35344928	504	130	AF_EAS	0.0011069	0.00717349
133	2	35344929	36123028	310	73	AF_EAS	0.00117475	0.00114963
134	2	36123029	38132911	874	219	AF_EAS	0.00427628	1.73134e-12
135	2	38132912	40508070	807	206	AF_EAS	0.00160433	0.00274122
136	2	40508071	42336744	832	198	AF_EAS	0.00214628	0.000194943
137	2	42336745	44322128	695	190	AF_EAS	0.00331386	7.32256e-10
138	2	44322129	46482634	991	278	AF_EAS	0.00470611	6.9881e-11
139	2	46482635	47806040	541	191	AF_EAS	0.00148608	0.00246078
140	2	47806041	49116026	330	115	AF_EAS	0.000892168	0.0258958
141	2	49116027	50818256	760	175	AF_EAS	0.00269542	1.23289e-06
142	2	50818257	52491017	693	175	AF_EAS	0.000975399	0.0293558
143	2	52491018	53355222	405	100	AF_EAS	0.00119161	0.000320626
144	2	53355223	54686322	512	134	AF_EAS	0.000476532	0.101367
145	2	54686323	57429035	1103	212	AF_EAS	0.00194027	0.00031239
146	2	57429036	57726344	88	26	AF_EAS	0.00112218	3.37555e-07
147	2	57726345	60728136	1130	240	AF_EAS	0.0049651	1.48984e-12
148	2	60728137	62429044	405	81	AF_EAS	0.00124692	0.00114852
149	2	62429045	64625085	588	127	AF_EAS	0.00137091	0.00128409
150	2	64625086	65936332	407	125	AF_EAS	0.00322467	7.73872e-10
151	2	65936333	67227248	542	139	AF_EAS	0.00165761	0.00041431
152	2	67227249	69375742	972	220	AF_EAS	0.00132029	0.00913817
153	2	69375743	70579922	362	81	AF_EAS	0.000451471	0.100681
154	2	70579923	73125598	695	194	AF_EAS	0.00215974	0.000101582
155	2	73125599	75409633	610	144	AF_EAS	0.00193942	3.94442e-05
156	2	75409634	76647377	516	130	AF_EAS	0.00117684	0.00399078
157	2	76647378	78080014	520	144	AF_EAS	0.00228082	4.43904e-06
158	2	78080015	80049718	868	196	AF_EAS	0.0040878	3.44317e-11
159	2	80049719	83606074	1029	194	AF_EAS	0.00261675	1.99707e-07
160	2	83606075	85893191	634	127	AF_EAS	0.000857807	0.0255016
161	2	85893192	86961902	386	70	AF_EAS	0.000631878	0.0282534
164	2	95326811	98629109	325	75	AF_EAS	0.00112246	0.00161254
166	2	100544639	101557234	399	81	AF_EAS	0.000179988	0.286989
167	2	101557235	103759508	790	157	AF_EAS	0.00160996	0.00026383
168	2	103759509	104714865	175	39	AF_EAS	0.00041354	0.040403
169	2	104714866	107780932	1057	236	AF_EAS	0.00371832	5.1633e-08
171	2	108996019	113477211	847	180	AF_EAS	0.000913681	0.0289993
172	2	113477212	116413651	822	169	AF_EAS	0.00232687	2.17561e-05
173	2	116413652	119581738	896	158	AF_EAS	0.00239364	1.14607e-05
174	2	119581739	121554317	564	151	AF_EAS	0.000920662	0.0234945
175	2	121554318	123396005	464	111	AF_EAS	0.000902227	0.0155032
176	2	123396006	124932993	520	89	AF_EAS	0.000828349	0.0146128
177	2	124932994	127752362	765	141	AF_EAS	0.00197769	1.35529e-05
178	2	127752363	129313014	474	114	AF_EAS	0.00146502	0.000789198
179	2	129313015	131767129	585	142	AF_EAS	0.00142316	0.00310889
180	2	131767130	132783544	70	17	AF_EAS	1.59813e-05	0.395905
181	2	132783545	135158693	890	233	AF_EAS	0.0013534	0.00367488
182	2	135158694	136977976	507	93	AF_EAS	0.000686939	0.0341409
183	2	136977977	139414544	901	181	AF_EAS	0.00247095	8.6694e-06
184	2	139414545	140903958	513	91	AF_EAS	0.000224601	0.258587
185	2	140903959	142793066	789	167	AF_EAS	0.00190139	0.0001661
186	2	142793067	144519478	521	110	AF_EAS	0.00110499	0.00491962
187	2	144519479	147956520	742	162	AF_EAS	0.00106212	0.017441
188	2	147956521	150473193	640	120	AF_EAS	0.000842344	0.0340526
189	2	150473194	153465188	1043	192	AF_EAS	0.00302147	6.86358e-07
190	2	153465189	155637294	680	175	AF_EAS	0.00283912	2.69969e-07
191	2	155637295	157560495	448	86	AF_EAS	0.000478943	0.0877145
192	2	157560496	159577115	542	132	AF_EAS	0.00148266	0.000592094
193	2	159577116	161769655	734	125	AF_EAS	0.00116427	0.00379247
194	2	161769656	163503840	348	66	AF_EAS	0.000171188	0.259087
195	2	163503841	165203973	401	108	AF_EAS	0.00224893	4.44536e-07
196	2	165203974	167128466	641	135	AF_EAS	0.00101787	0.00959947
198	2	167490429	169588988	682	166	AF_EAS	0.000597724	0.100819
199	2	169588989	171319417	709	166	AF_EAS	0.00354209	4.52275e-09
200	2	171319418	174122650	966	220	AF_EAS	0.00396652	5.03435e-10
201	2	174122651	177074923	818	201	AF_EAS	0.00467029	2.6595e-12
202	2	177074924	179244504	629	126	AF_EAS	0.000624065	0.0501048
203	2	179244505	181812685	871	182	AF_EAS	0.00247712	3.83494e-06
204	2	181812686	184145976	754	142	AF_EAS	0.00112724	0.00436836
205	2	184145977	186242927	509	105	AF_EAS	0.000498217	0.0897031
206	2	186242928	188897634	616	83	AF_EAS	0.00190442	9.65556e-08
207	2	188897635	191973455	760	145	AF_EAS	0.00131318	0.00362231
208	2	191973456	195123359	482	122	AF_EAS	0.00230639	9.93237e-07
209	2	195123360	197140125	522	115	AF_EAS	0.00200857	1.1463e-05
210	2	197140126	198142797	255	49	AF_EAS	0.000597892	0.0276382
211	2	198142798	200513800	510	76	AF_EAS	0.000891621	0.00828803
212	2	200513801	201357289	301	74	AF_EAS	0.0011526	0.00239368
213	2	201357290	202542475	325	72	AF_EAS	0.00026799	0.175303
214	2	202542476	205363047	780	156	AF_EAS	0.00140739	0.00148672
215	2	205363048	208120624	930	216	AF_EAS	0.00424655	6.85829e-11
216	2	208120625	209941699	430	98	AF_EAS	0.00120089	0.00139461
217	2	209941700	212194775	596	99	AF_EAS	0.00122894	0.000930982
218	2	212194776	214013653	645	157	AF_EAS	0.00233057	2.21066e-06
219	2	214013654	215573226	429	85	AF_EAS	0.000468456	0.0776168
220	2	215573227	218395307	996	239	AF_EAS	0.00416702	6.77899e-10
221	2	218395308	219853567	438	101	AF_EAS	0.00115696	0.00267945
222	2	219853568	222520904	1005	220	AF_EAS	0.0041653	6.22321e-12
223	2	222520905	224859323	721	187	AF_EAS	0.00184142	0.000835442
224	2	224859324	227665678	906	161	AF_EAS	0.00144374	0.00324891
225	2	227665679	229593915	676	150	AF_EAS	0.00319452	2.6519e-08
226	2	229593916	232191250	887	209	AF_EAS	0.0021262	0.000175963
227	2	232191251	233550713	370	108	AF_EAS	0.00137409	0.00118494
228	2	233550714	234883167	635	137	AF_EAS	0.000339218	0.170269
229	2	234883168	236066960	567	189	AF_EAS	0.00433192	1.00793e-11
230	2	236066961	237201266	327	102	AF_EAS	0.000756587	0.0210988
231	2	237201267	238502381	403	125	AF_EAS	0.00128536	0.00152359
232	2	238502382	240328718	669	186	AF_EAS	0.00315394	4.7471e-08
233	2	240328719	241459497	451	147	AF_EAS	0.00342248	2.11969e-10
234	2	241459498	242489409	364	104	AF_EAS	0.000618824	0.0556184
235	2	242489410	243188920	51	22	AF_EAS	0.000132489	0.215571
236	3	60157	1164057	349	120	AF_EAS	0.000859734	0.0139942
237	3	1164058	2863911	959	255	AF_EAS	0.00336694	1.88697e-07
238	3	2863912	5108349	1079	291	AF_EAS	0.00477535	3.85441e-12
239	3	5108350	6724765	697	222	AF_EAS	0.00263824	4.22057e-06
240	3	6724766	8051951	728	191	AF_EAS	0.00285768	7.57852e-07
241	3	8051952	9899533	794	217	AF_EAS	0.00231235	7.57581e-05
242	3	9899534	11019488	530	173	AF_EAS	0.00137822	0.00419472
243	3	11019489	12860229	655	157	AF_EAS	0.00108825	0.0106811
244	3	12860230	14816750	780	221	AF_EAS	0.00242592	2.04574e-05
245	3	14816751	16664547	675	158	AF_EAS	0.0020972	6.02583e-05
246	3	16664548	17891041	284	72	AF_EAS	0.000665656	0.0289556
247	3	17891042	19789003	414	108	AF_EAS	0.000587313	0.0569997
249	3	20375346	21643707	515	143	AF_EAS	0.00310736	1.35864e-08
250	3	21643708	22647520	565	169	AF_EAS	0.0012687	0.00389197
251	3	22647521	25460047	1102	260	AF_EAS	0.00479652	4.16388e-12
252	3	25460048	27611777	634	143	AF_EAS	0.0016993	0.000369218
253	3	27611778	30484625	1064	253	AF_EAS	0.00490791	1.14586e-12
254	3	30484626	31726060	537	152	AF_EAS	0.000498913	0.151316
255	3	31726061	32845663	388	148	AF_EAS	0.00199889	6.83737e-05
256	3	32845664	33989246	317	75	AF_EAS	1.14448e-05	0.437424
257	3	33989247	35283408	359	78	AF_EAS	0.000325437	0.179361
258	3	35283409	38353505	1025	178	AF_EAS	0.00230677	1.77369e-05
259	3	38353506	40796032	832	158	AF_EAS	0.00231876	6.29949e-06
260	3	40796033	42540434	472	123	AF_EAS	0.000660188	0.0401417
261	3	42540435	45151576	671	128	AF_EAS	0.0011455	0.00422078
262	3	45151577	45992977	355	95	AF_EAS	0.00122808	0.00102927
263	3	45992978	47793553	423	77	AF_EAS	0.000317516	0.20582
264	3	47793554	51831792	799	63	AF_EAS	0.00106152	0.00112436
265	3	51831793	53739789	559	96	AF_EAS	0.00166959	0.000378008
266	3	53739790	55348768	737	214	AF_EAS	0.00135686	0.00510476
267	3	55348769	56847831	529	114	AF_EAS	0.000762983	0.0364686
268	3	56847832	59704331	822	163	AF_EAS	0.00193809	6.45609e-05
269	3	59704332	61958750	1131	273	AF_EAS	0.00514902	1.72977e-12
270	3	61958751	63669879	761	205	AF_EAS	0.000873437	0.0503532
271	3	63669880	65273079	749	217	AF_EAS	0.00320374	2.38141e-08
272	3	65273080	66270447	270	110	AF_EAS	0.00114009	0.00683956
273	3	66270448	67742901	585	163	AF_EAS	0.00113096	0.00920581
274	3	67742902	68646218	250	73	AF_EAS	0.000161713	0.280768
275	3	68646219	70449028	623	177	AF_EAS	0.00104258	0.0220561
276	3	70449029	72528426	649	230	AF_EAS	0.00490652	6.96529e-12
277	3	72528427	74398940	722	213	AF_EAS	0.00413609	2.61862e-11
278	3	74398941	75717386	251	67	AF_EAS	3.02826e-05	0.427023
279	3	75717387	79024471	945	209	AF_EAS	0.00206148	0.000457292
280	3	79024472	82022276	709	106	AF_EAS	0.000982942	0.0108303
281	3	82022277	82527031	125	24	AF_EAS	0.000608029	0.0039506
283	3	84961751	87590636	710	111	AF_EAS	0.0011911	0.00261333
284	3	87590637	89775033	530	90	AF_EAS	0.00149193	0.000194854
285	3	89775034	94256163	183	38	AF_EAS	0.000723335	0.00556799
286	3	94256164	96058347	420	63	AF_EAS	0.000751126	0.012348
287	3	96058348	98215516	463	92	AF_EAS	0.000839114	0.011732
288	3	98215517	100553825	768	124	AF_EAS	0.00241573	1.94415e-06
289	3	100553826	102013409	425	75	AF_EAS	0.000337729	0.114589
290	3	102013410	104581613	703	130	AF_EAS	0.00210725	8.97493e-06
291	3	104581614	106834267	697	146	AF_EAS	0.00134103	0.00179474
292	3	106834268	108638228	508	107	AF_EAS	0.000228592	0.278562
293	3	108638229	110929056	576	91	AF_EAS	0.00125367	0.000598086
294	3	110929057	112455117	551	122	AF_EAS	0.00158392	0.000279552
295	3	112455118	113650586	426	93	AF_EAS	0.000334494	0.157446
296	3	113650587	115605661	473	141	AF_EAS	0.00227031	3.83163e-06
297	3	115605662	116898042	524	115	AF_EAS	0.00147047	0.00049735
298	3	116898043	118903462	662	153	AF_EAS	0.00270419	3.20555e-07
299	3	118903463	120523073	581	110	AF_EAS	0.00131608	0.00163701
300	3	120523074	121822627	356	47	AF_EAS	6.92233e-05	0.363896
301	3	121822628	123198641	475	112	AF_EAS	0.00071892	0.0291819
302	3	123198642	124936549	694	161	AF_EAS	0.00382036	8.08682e-12
304	3	126214331	128194796	652	149	AF_EAS	0.00293279	1.54879e-07
305	3	128194797	130024576	411	84	AF_EAS	0.00130483	0.000290207
306	3	130024577	131836226	713	149	AF_EAS	0.000712639	0.0625144
307	3	131836227	133573172	657	134	AF_EAS	0.00123916	0.00811923
308	3	133573173	135268752	620	155	AF_EAS	0.00111675	0.00868126
309	3	135268753	137727495	535	99	AF_EAS	0.000643006	0.0442635
310	3	137727496	139847179	620	120	AF_EAS	0.000934754	0.0180609
311	3	139847180	141034491	408	123	AF_EAS	0.00124918	0.00347979
312	3	141034492	142985100	597	141	AF_EAS	0.00118061	0.00861328
313	3	142985101	144169280	409	102	AF_EAS	0.000362928	0.163391
314	3	144169281	146285125	669	117	AF_EAS	0.000419617	0.125313
315	3	146285126	148637333	640	150	AF_EAS	0.00222856	6.69866e-06
316	3	148637334	150530065	608	168	AF_EAS	0.00142779	0.00136118
317	3	150530066	151256352	281	75	AF_EAS	0.000275788	0.188431
318	3	151256353	152222143	273	73	AF_EAS	0.000565551	0.0548276
319	3	152222144	153407526	365	106	AF_EAS	0.00021444	0.280444
320	3	153407527	154485881	289	54	AF_EAS	0.000521692	0.0437624
321	3	154485882	157311596	798	165	AF_EAS	0.00333586	1.73979e-09
322	3	157311597	159155377	574	95	AF_EAS	0.00173359	4.11039e-05
323	3	159155378	161620009	726	137	AF_EAS	0.00209292	1.00697e-05
324	3	161620010	165935731	1116	155	AF_EAS	0.00142716	0.00274781
325	3	165935732	168270619	539	99	AF_EAS	0.00202025	5.02563e-06
326	3	168270620	172048457	1163	250	AF_EAS	0.00786626	6.02462e-25
327	3	172048458	175051223	963	217	AF_EAS	0.00388899	1.54331e-11
328	3	175051224	176928975	546	137	AF_EAS	0.00213865	1.64083e-05
329	3	176928976	179376588	663	160	AF_EAS	0.00177639	0.000492193
331	3	181637724	184112682	704	171	AF_EAS	0.00347812	1.21403e-09
332	3	184112683	186230742	636	184	AF_EAS	0.00223603	2.58322e-05
333	3	186230743	188951597	959	263	AF_EAS	0.00717791	2.9121e-23
334	3	188951598	190355509	566	158	AF_EAS	3.23796e-05	0.378658
335	3	190355510	192344597	722	162	AF_EAS	0.00206775	4.16824e-05
336	3	192344598	193962112	520	146	AF_EAS	0.0020127	6.2962e-05
337	3	193962113	195349066	443	142	AF_EAS	0.00108264	0.0155229
338	3	195349067	196728482	282	90	AF_EAS	0.000165069	0.333226
340	4	10240	695912	111	26	AF_EAS	0.000121754	0.266947
341	4	695913	2306583	393	98	AF_EAS	0.00150854	0.000187434
342	4	2306584	3384844	263	73	AF_EAS	0.000857106	0.00657674
343	4	3384845	4989588	494	158	AF_EAS	0.00145439	0.00197962
344	4	4989589	6325242	604	189	AF_EAS	0.000916451	0.0253921
345	4	6325243	7663190	550	227	AF_EAS	0.00415192	1.10832e-11
346	4	7663191	9217084	469	172	AF_EAS	0.00275857	4.43387e-07
347	4	9217085	10698980	552	91	AF_EAS	0.00137459	0.000890303
348	4	10698981	13004348	856	181	AF_EAS	0.00214743	2.35201e-05
349	4	13004349	15148516	696	187	AF_EAS	0.00248244	1.68071e-05
350	4	15148517	16579695	650	164	AF_EAS	0.00173919	0.000385754
351	4	16579696	18752293	710	166	AF_EAS	0.00395372	1.03536e-10
352	4	18752294	20486651	423	94	AF_EAS	0.0020139	2.96447e-06
353	4	20486652	22319288	740	175	AF_EAS	0.00124758	0.00318639
354	4	22319289	24135369	607	163	AF_EAS	0.000634402	0.0952585
355	4	24135370	26836317	890	257	AF_EAS	0.00425895	1.0199e-10
356	4	26836318	29313037	755	165	AF_EAS	0.00183159	0.000327206
357	4	29313038	31205517	500	133	AF_EAS	0.00150615	0.00096614
358	4	31205518	32593453	439	101	AF_EAS	0.000980857	0.00844388
359	4	32593454	35151582	490	82	AF_EAS	0.00186343	4.33499e-06
360	4	35151583	36540810	450	101	AF_EAS	0.000738854	0.0241029
361	4	36540811	38203464	714	181	AF_EAS	0.00435798	1.70939e-12
362	4	38203465	40588393	848	240	AF_EAS	0.00630697	1.09116e-20
363	4	40588394	42664297	678	177	AF_EAS	0.00281088	2.13121e-07
364	4	42664298	45189270	767	132	AF_EAS	0.000966286	0.0120906
367	4	47997646	54658565	870	144	AF_EAS	0.00152673	0.00188837
368	4	54658566	57458942	849	188	AF_EAS	0.00275768	1.12961e-06
369	4	57458943	59360441	701	170	AF_EAS	0.0019366	0.000109602
370	4	59360442	60608829	362	79	AF_EAS	0.000669477	0.0275432
371	4	60608830	61598883	276	62	AF_EAS	0.00155633	2.40853e-05
372	4	61598884	63843686	532	146	AF_EAS	0.00170568	0.000177947
374	4	64504615	65592228	211	37	AF_EAS	0.000512349	0.0202565
375	4	65592229	68741353	930	164	AF_EAS	0.00194418	0.000114985
376	4	68741354	69601808	92	15	AF_EAS	0.000126938	0.199289
377	4	69601809	72418006	675	112	AF_EAS	0.00185108	1.45073e-05
378	4	72418007	74888947	627	123	AF_EAS	0.000808138	0.0275312
379	4	74888948	77718852	925	171	AF_EAS	0.00219559	1.77061e-05
380	4	77718853	78969420	453	86	AF_EAS	0.000532857	0.0657076
381	4	78969421	80322665	389	73	AF_EAS	0.00223766	1.82156e-08
382	4	80322666	82691669	624	131	AF_EAS	0.00168935	0.000119701
383	4	82691670	83510372	232	63	AF_EAS	0.000105029	0.346636
384	4	83510373	84922154	455	85	AF_EAS	0.000927325	0.00542973
385	4	84922155	87214993	645	111	AF_EAS	0.00107478	0.00544475
386	4	87214994	89236855	636	133	AF_EAS	0.00119431	0.00168491
387	4	89236856	90500460	391	94	AF_EAS	0.00101385	0.00528545
388	4	90500461	92166236	503	105	AF_EAS	0.00142276	0.000437286
389	4	92166237	94233168	420	105	AF_EAS	0.00157296	9.37378e-05
390	4	94233169	95896913	496	110	AF_EAS	0.00168207	5.54271e-05
391	4	95896914	97912515	658	151	AF_EAS	0.00245593	1.79629e-06
392	4	97912516	99040831	244	31	AF_EAS	0.000168595	0.198873
393	4	99040832	101711689	873	143	AF_EAS	0.00229574	9.93793e-07
394	4	101711690	102707193	263	67	AF_EAS	0.00019839	0.259671
395	4	102707194	105305539	662	101	AF_EAS	0.00105134	0.0034032
396	4	105305540	107501341	590	92	AF_EAS	1.20362e-05	0.437491
397	4	107501342	109780301	573	119	AF_EAS	0.000520151	0.0778978
398	4	109780302	111466213	510	139	AF_EAS	0.0014722	0.00141673
399	4	111466214	114687995	981	211	AF_EAS	0.0437464	9.53596e-281
400	4	114687996	118224725	936	147	AF_EAS	0.0015174	0.00112357
401	4	118224726	119932620	526	97	AF_EAS	0.000221812	0.210124
402	4	119932621	121393951	463	88	AF_EAS	0.000262956	0.221293
403	4	121393952	122458885	401	85	AF_EAS	0.000611469	0.0688062
404	4	122458886	124387408	481	93	AF_EAS	0.000133341	0.314284
405	4	124387409	126751239	752	171	AF_EAS	0.00286645	8.47887e-08
406	4	126751240	127833073	320	80	AF_EAS	0.00181797	8.37365e-06
407	4	127833074	130591861	756	142	AF_EAS	0.000779904	0.0405781
408	4	130591862	131284305	221	60	AF_EAS	0.00011984	0.35537
409	4	131284306	133742120	604	132	AF_EAS	0.000770588	0.0244546
410	4	133742121	134111558	82	21	AF_EAS	0.000710632	0.000921984
411	4	134111559	135954226	259	57	AF_EAS	0.00121763	0.000110334
412	4	135954227	137831942	446	112	AF_EAS	0.00174556	5.96925e-05
413	4	137831943	139197294	441	115	AF_EAS	0.00180619	5.30262e-05
414	4	139197295	143226784	1292	280	AF_EAS	0.00315075	3.84329e-07
415	4	143226785	145025810	309	62	AF_EAS	0.000344894	0.124932
416	4	145025811	148834277	934	190	AF_EAS	0.00247666	8.50292e-06
417	4	148834278	150683433	459	98	AF_EAS	0.00132181	0.000587941
419	4	152782185	154122370	407	114	AF_EAS	0.000127152	0.332439
420	4	154122371	155546839	474	134	AF_EAS	0.0013387	0.00292281
421	4	155546840	157596253	731	173	AF_EAS	0.00232201	7.04506e-06
422	4	157596254	158455363	212	42	AF_EAS	0.000104008	0.273092
423	4	158455364	161798202	855	181	AF_EAS	0.000701822	0.0668572
424	4	161798203	161998784	55	10	AF_EAS	0.000228668	0.0535461
425	4	161998785	163413310	511	129	AF_EAS	0.00111535	0.00460969
426	4	163413311	164173867	137	42	AF_EAS	0.000432996	0.0483073
427	4	164173868	165472929	437	125	AF_EAS	0.000412288	0.192787
428	4	165472930	166593952	391	113	AF_EAS	0.000375278	0.196457
429	4	166593953	167853560	359	101	AF_EAS	0.00217857	1.04428e-06
430	4	167853561	169676676	479	131	AF_EAS	0.001883	4.59626e-05
431	4	169676677	171209592	417	101	AF_EAS	0.000149746	0.34971
432	4	171209593	172963785	396	93	AF_EAS	0.00106499	0.00308876
433	4	172963786	174857042	421	122	AF_EAS	0.00463545	2.13094e-17
434	4	174857043	176376342	466	132	AF_EAS	0.00178827	3.67935e-05
435	4	176376343	179391123	957	243	AF_EAS	0.00918757	1.6771e-34
436	4	179391124	180547908	410	130	AF_EAS	0.00134686	0.00252081
437	4	180547909	183473284	1285	321	AF_EAS	0.00612245	8.28492e-18
438	4	183473285	184930023	460	180	AF_EAS	0.00340342	2.48845e-09
439	4	184930024	186544264	555	187	AF_EAS	0.00276446	1.15089e-06
440	4	186544265	187867533	581	196	AF_EAS	0.00298611	2.73899e-07
441	4	187867534	189155114	358	128	AF_EAS	0.00107907	0.00943921
442	4	189155115	189915203	246	83	AF_EAS	0.00105384	0.00376355
443	4	189915204	191043594	144	61	AF_EAS	0.00035763	0.110078
444	5	11940	1483180	292	110	AF_EAS	0.00104511	0.00925822
445	5	1483181	2851269	707	213	AF_EAS	0.00465458	5.16827e-14
446	5	2851270	4940255	941	246	AF_EAS	0.00496006	2.11748e-13
447	5	4940256	5973036	508	149	AF_EAS	0.00172728	0.000209657
448	5	5973037	8445402	1133	234	AF_EAS	0.00286492	3.83598e-07
449	5	8445403	9873006	639	151	AF_EAS	0.00368125	1.01622e-10
450	5	9873007	11849590	837	223	AF_EAS	0.0015072	0.00456649
451	5	11849591	13611631	394	74	AF_EAS	0.000462925	0.0766336
452	5	13611632	17400372	1245	267	AF_EAS	0.00200616	0.00113946
453	5	17400373	18850604	369	104	AF_EAS	0.00110218	0.00534547
454	5	18850605	22657008	951	151	AF_EAS	0.0022519	6.32855e-06
455	5	22657009	23719696	343	87	AF_EAS	0.000408063	0.103245
456	5	23719697	26124488	634	134	AF_EAS	0.000938551	0.0217327
457	5	26124489	27316597	289	74	AF_EAS	0.000597212	0.0362055
458	5	27316598	29594524	525	104	AF_EAS	0.000477032	0.0764761
459	5	29594525	31391126	567	139	AF_EAS	0.00114464	0.00955241
460	5	31391127	33500818	789	193	AF_EAS	0.00315979	3.55363e-07
461	5	33500819	35048572	572	163	AF_EAS	0.00210644	2.39488e-05
462	5	35048573	36433092	547	129	AF_EAS	0.00228279	5.66146e-06
463	5	36433093	38802788	736	188	AF_EAS	0.00252814	6.40248e-06
464	5	38802789	40287729	561	116	AF_EAS	0.00248948	8.49993e-07
465	5	40287730	42858747	643	106	AF_EAS	0.00115508	0.0038412
467	5	44045381	49410915	329	38	AF_EAS	0.00026965	0.172207
468	5	49410916	51701349	440	83	AF_EAS	0.000988177	0.00455441
469	5	51701350	53748307	838	173	AF_EAS	0.000852566	0.0557546
470	5	53748308	55416658	569	97	AF_EAS	0.000347228	0.175959
471	5	55416659	57339005	684	174	AF_EAS	0.0013686	0.00373779
472	5	57339006	58523945	561	125	AF_EAS	0.00333609	1.6429e-10
473	5	58523946	61247124	787	151	AF_EAS	0.000952753	0.0326124
474	5	61247125	62536058	423	59	AF_EAS	0.000226144	0.224906
475	5	62536059	65205427	783	131	AF_EAS	0.000116071	0.351476
476	5	65205428	67851517	846	189	AF_EAS	0.0026572	3.28646e-06
477	5	67851518	71419711	543	113	AF_EAS	0.00113891	0.0036251
478	5	71419712	73759199	844	187	AF_EAS	0.00428022	5.48091e-12
479	5	73759200	76221198	850	187	AF_EAS	0.00299319	1.47442e-07
480	5	76221199	77283975	456	118	AF_EAS	0.0015359	0.000378163
481	5	77283976	79394041	738	180	AF_EAS	0.000727692	0.060949
482	5	79394042	79992758	174	48	AF_EAS	0.000254189	0.144212
483	5	79992759	81237241	402	111	AF_EAS	0.000717447	0.0442833
484	5	81237242	83972773	729	200	AF_EAS	0.00351611	1.09313e-08
485	5	83972774	85767057	516	98	AF_EAS	0.000957918	0.0127163
486	5	85767058	87438020	243	69	AF_EAS	0.000225058	0.2021
487	5	87438021	90423339	711	144	AF_EAS	0.00196961	8.09351e-05
488	5	90423340	91840637	272	77	AF_EAS	0.00111711	0.00142944
489	5	91840638	93811097	369	90	AF_EAS	0.00103853	0.00735473
490	5	93811098	96374150	878	170	AF_EAS	0.00263638	6.90882e-07
492	5	97316376	99261850	503	85	AF_EAS	4.45729e-05	0.401892
493	5	99261851	100595234	275	43	AF_EAS	2.32451e-05	0.401406
494	5	100595235	103181351	706	129	AF_EAS	0.00139041	0.00140605
495	5	103181352	104854817	399	85	AF_EAS	0.00134781	0.000199854
496	5	104854818	106909041	505	124	AF_EAS	0.000497136	0.0948842
497	5	106909042	109233618	784	162	AF_EAS	0.00146811	0.000716999
498	5	109233619	110896791	486	131	AF_EAS	0.000589607	0.10533
499	5	110896792	112302830	434	123	AF_EAS	0.0019902	1.84758e-05
500	5	112302831	113777986	622	126	AF_EAS	0.0033821	1.4575e-10
501	5	113777987	114751103	310	90	AF_EAS	0.000955622	0.00675508
502	5	114751104	115879777	522	119	AF_EAS	0.000880933	0.0133506
503	5	115879778	117082850	400	110	AF_EAS	0.00110529	0.00552996
504	5	117082851	118675901	339	116	AF_EAS	0.000312479	0.187846
506	5	119669847	122002653	621	148	AF_EAS	0.00268019	1.10681e-07
507	5	122002654	123240670	419	93	AF_EAS	0.00133614	0.000548858
508	5	123240671	125128470	693	202	AF_EAS	0.00325636	1.0219e-07
509	5	125128471	127345468	778	166	AF_EAS	0.00353142	1.70166e-10
510	5	127345469	129519147	629	120	AF_EAS	0.00358971	3.79399e-11
511	5	129519148	132007338	594	74	AF_EAS	0.000297694	0.162352
512	5	132007339	134777577	920	218	AF_EAS	0.00122751	0.0130125
513	5	134777578	136376492	574	104	AF_EAS	0.00053706	0.07364
514	5	136376493	139409053	756	141	AF_EAS	0.00132513	0.00360011
515	5	139409054	141852077	777	145	AF_EAS	0.00363144	8.0125e-12
516	5	141852078	143592976	715	174	AF_EAS	0.00268915	9.1185e-07
517	5	143592977	146434800	821	151	AF_EAS	0.000789384	0.0355621
518	5	146434801	148549094	740	176	AF_EAS	0.00224917	2.76822e-05
519	5	148549095	150911275	1058	244	AF_EAS	0.00337762	4.31657e-08
520	5	150911276	152504700	546	110	AF_EAS	0.00156898	0.000247569
521	5	152504701	153899307	489	114	AF_EAS	0.00154568	0.000202126
522	5	153899308	156627810	818	162	AF_EAS	0.00198569	0.000161119
523	5	156627811	157585548	367	79	AF_EAS	0.000927608	0.00382047
524	5	157585549	159866697	733	182	AF_EAS	0.0016268	0.00105659
525	5	159866698	161694489	673	146	AF_EAS	0.00180414	0.000405734
526	5	161694490	163803607	638	155	AF_EAS	0.00181987	0.000134661
527	5	163803608	165314602	460	142	AF_EAS	0.00112298	0.00621495
528	5	165314603	167651859	766	248	AF_EAS	0.00205908	0.00022635
529	5	167651860	169330611	781	209	AF_EAS	0.00399068	1.69051e-11
530	5	169330612	170904981	651	176	AF_EAS	0.00217162	3.63954e-05
531	5	170904982	172766002	666	207	AF_EAS	0.00443485	3.64458e-12
532	5	172766003	174167623	620	185	AF_EAS	0.00194875	0.000410272
533	5	174167624	176509938	703	211	AF_EAS	0.00525002	1.47161e-14
534	5	176509939	179096402	767	204	AF_EAS	0.00436227	7.29049e-11
535	5	179096403	179828925	236	84	AF_EAS	0.00153406	6.91257e-05
537	6	73924	1452083	509	160	AF_EAS	0.00196858	2.38821e-05
538	6	1452084	2510436	379	121	AF_EAS	0.00102029	0.0134951
539	6	2510437	4317569	811	186	AF_EAS	0.00148853	0.00234831
540	6	4317570	5057821	329	94	AF_EAS	0.000487542	0.0668788
541	6	5057822	6752797	828	219	AF_EAS	0.00346756	2.39996e-08
542	6	6752798	7975637	545	160	AF_EAS	0.00182534	7.7717e-05
544	6	9020425	10627076	546	152	AF_EAS	0.00113886	0.00866904
545	6	10627077	12365129	713	185	AF_EAS	0.00179505	0.000477435
546	6	12365130	13835830	521	125	AF_EAS	0.00281676	2.28809e-08
547	6	13835831	15819455	670	180	AF_EAS	0.00261553	1.0999e-05
548	6	15819456	18404207	916	234	AF_EAS	0.00400101	1.89228e-09
549	6	18404208	19672632	469	92	AF_EAS	0.00105343	0.00253357
550	6	19672633	23199920	1254	280	AF_EAS	0.00479414	1.30309e-11
551	6	23199921	24397129	493	147	AF_EAS	0.00306345	2.72818e-08
552	6	24397130	26141757	869	177	AF_EAS	0.000386589	0.219367
555	6	28901403	29688046	12	5	AF_EAS	3.06459e-06	0.402244
556	6	29688047	30458591	15	2	AF_EAS	1.83986e-05	0.262111
559	6	31571895	32682590	102	36	AF_EAS	0.000496053	0.0407348
560	6	32682591	33209310	182	53	AF_EAS	0.000363817	0.092835
561	6	33209311	35757007	831	192	AF_EAS	0.00590391	1.23499e-18
562	6	35757008	37112681	522	138	AF_EAS	0.00186981	6.60375e-05
563	6	37112682	39022823	678	170	AF_EAS	0.000945312	0.036209
564	6	39022824	40434091	620	155	AF_EAS	0.00124143	0.00667705
565	6	40434092	41712058	529	144	AF_EAS	0.0018064	0.000116826
566	6	41712059	43728479	549	140	AF_EAS	0.00208007	4.08519e-06
567	6	43728480	45405389	505	135	AF_EAS	0.00284607	1.11782e-08
568	6	45405390	46731324	459	92	AF_EAS	0.000771658	0.0255865
569	6	46731325	49957253	1067	156	AF_EAS	0.00187373	0.000149648
570	6	49957254	51171480	236	40	AF_EAS	5.4144e-05	0.364051
571	6	51171481	52828869	676	140	AF_EAS	0.00187547	0.000142838
572	6	52828870	54293678	634	124	AF_EAS	0.0014964	0.000842433
574	6	56105708	58138275	316	65	AF_EAS	0.00237297	3.63532e-09
576	6	62693824	64607599	421	56	AF_EAS	0.000526968	0.036118
577	6	64607600	65764776	297	61	AF_EAS	0.000724135	0.0110013
580	6	67906137	70361484	724	119	AF_EAS	0.000604614	0.0759599
581	6	70361485	71609005	446	87	AF_EAS	0.000654925	0.0409197
582	6	71609006	73451673	571	113	AF_EAS	0.000609192	0.0748301
584	6	74404069	76627639	665	124	AF_EAS	0.0013579	0.00143906
585	6	76627640	77415155	256	56	AF_EAS	0.000477637	0.0612381
586	6	77415156	78385577	336	70	AF_EAS	0.00116953	0.000365953
587	6	78385578	80691482	749	122	AF_EAS	0.00126621	0.00209796
588	6	80691483	82389311	544	74	AF_EAS	0.00166062	2.57695e-05
589	6	82389312	84742341	696	150	AF_EAS	0.00268866	5.10623e-07
590	6	84742342	87650463	930	145	AF_EAS	0.00231369	1.96633e-06
591	6	87650464	88857392	365	73	AF_EAS	0.000529529	0.0711301
592	6	88857393	91092352	758	173	AF_EAS	0.00233637	1.69222e-05
594	6	92348706	94329244	709	155	AF_EAS	0.00372567	3.93446e-11
595	6	94329245	96490134	554	113	AF_EAS	0.000912532	0.0103186
596	6	96490135	98021637	464	77	AF_EAS	0.00107645	0.000987728
597	6	98021638	100875516	755	154	AF_EAS	0.00309361	7.85671e-10
598	6	100875517	102201824	325	66	AF_EAS	0.00127926	0.000127458
599	6	102201825	104733704	714	135	AF_EAS	0.00296539	4.35156e-09
600	6	104733705	107240062	882	206	AF_EAS	0.0026859	3.04595e-06
601	6	107240063	108858460	476	135	AF_EAS	0.00146289	0.00107015
602	6	108858461	110305071	471	85	AF_EAS	0.000785266	0.021151
603	6	110305072	112345456	579	124	AF_EAS	0.00141208	0.00130858
604	6	112345457	114220833	654	144	AF_EAS	0.00193793	0.000166019
605	6	114220834	116703926	597	100	AF_EAS	0.00173697	1.31693e-05
606	6	116703927	118099644	459	102	AF_EAS	0.0020494	2.37565e-06
607	6	118099645	120338588	722	128	AF_EAS	0.00332919	1.27097e-13
608	6	120338589	122348428	601	105	AF_EAS	0.00389307	1.22966e-13
609	6	122348429	124099184	526	111	AF_EAS	0.00269184	1.8039e-09
610	6	124099185	127540155	865	204	AF_EAS	0.00367936	3.70707e-09
611	6	127540156	129860936	464	110	AF_EAS	0.00120954	0.00341928
612	6	129860937	130935711	435	118	AF_EAS	0.000512844	0.0826976
613	6	130935712	132891666	636	145	AF_EAS	0.00115557	0.00593286
614	6	132891667	134243918	572	119	AF_EAS	0.00139629	0.000914195
615	6	134243919	136223664	554	145	AF_EAS	0.00233448	2.62334e-06
616	6	136223665	138245745	608	151	AF_EAS	0.00181215	0.000376103
617	6	138245746	139976687	551	167	AF_EAS	0.000239264	0.24198
618	6	139976688	142288533	512	81	AF_EAS	0.00128695	0.000621426
619	6	142288534	145518030	1088	244	AF_EAS	0.00900497	2.64767e-31
620	6	145518031	147740272	591	109	AF_EAS	0.000402379	0.138448
621	6	147740273	150755000	1268	277	AF_EAS	0.00405706	8.31822e-10
622	6	150755001	152702385	904	250	AF_EAS	0.00573757	5.66629e-16
623	6	152702386	153993093	507	118	AF_EAS	0.00067064	0.0388423
624	6	153993094	157641072	1221	283	AF_EAS	0.00439737	1.88541e-09
625	6	157641073	159542046	641	138	AF_EAS	0.00198125	2.09245e-05
626	6	159542047	162169452	1044	216	AF_EAS	0.00407789	1.41498e-10
627	6	162169453	164360067	930	215	AF_EAS	0.0031277	8.71122e-08
628	6	164360068	166831724	1172	250	AF_EAS	0.00195411	0.000351459
629	6	166831725	168042468	483	148	AF_EAS	0.00301255	7.99286e-09
630	6	168042469	169236971	519	136	AF_EAS	0.000865864	0.0264447
631	6	169236972	169946666	281	74	AF_EAS	0.000865522	0.00570716
632	6	169946667	171051270	329	79	AF_EAS	0.000400526	0.139668
633	7	16161	1240747	245	73	AF_EAS	0.000601848	0.042735
634	7	1240748	2482290	314	94	AF_EAS	0.0012517	0.00109873
635	7	2482291	4142453	661	176	AF_EAS	0.00206401	0.000117807
636	7	4142454	5455378	374	146	AF_EAS	0.00206422	4.32861e-05
637	7	5455379	6573087	269	80	AF_EAS	0.00167166	1.13209e-05
638	7	6573088	8162908	615	183	AF_EAS	0.000361195	0.237367
639	7	8162909	9034684	409	143	AF_EAS	0.00381788	1.65124e-11
640	7	9034685	10882977	758	185	AF_EAS	0.00231868	4.6982e-06
641	7	10882978	12635431	913	205	AF_EAS	0.000679882	0.108771
642	7	12635432	14141608	599	182	AF_EAS	0.00173772	0.00110607
643	7	14141609	15591421	578	174	AF_EAS	0.00299447	7.34544e-08
644	7	15591422	16902524	640	165	AF_EAS	0.000803895	0.0415401
645	7	16902525	18759806	738	224	AF_EAS	0.00229212	6.08205e-05
646	7	18759807	21715378	1297	299	AF_EAS	0.00639257	6.57995e-17
647	7	21715379	23472033	849	238	AF_EAS	0.00379777	1.18049e-09
648	7	23472034	26552261	1361	292	AF_EAS	0.00479301	7.30726e-12
649	7	26552262	28554104	704	167	AF_EAS	0.00238426	6.85909e-06
650	7	28554105	31137289	1063	254	AF_EAS	0.0043883	1.0118e-10
651	7	31137290	33997077	1156	229	AF_EAS	0.00216729	0.00011445
652	7	33997078	36120153	735	146	AF_EAS	0.00165124	0.000222246
653	7	36120154	37910002	829	212	AF_EAS	0.00363784	9.15785e-10
654	7	37910003	38965629	504	109	AF_EAS	0.00211667	2.25758e-06
655	7	38965630	40482673	434	90	AF_EAS	0.000775245	0.0204334
656	7	40482674	41853482	403	101	AF_EAS	0.000636944	0.0607442
657	7	41853483	43448397	536	147	AF_EAS	0.00105014	0.0117119
658	7	43448398	45523273	603	136	AF_EAS	0.00217977	1.77863e-05
659	7	45523274	47104276	601	142	AF_EAS	0.001751	0.000238097
660	7	47104277	49211848	837	194	AF_EAS	0.00272291	4.09411e-06
661	7	49211849	51674880	943	175	AF_EAS	0.00034097	0.224688
662	7	51674881	53176376	685	164	AF_EAS	0.00253531	1.58628e-07
663	7	53176377	54905959	648	105	AF_EAS	0.000311837	0.189706
664	7	54905960	57382764	527	112	AF_EAS	0.000776129	0.028897
665	7	57382765	62560322	77	18	AF_EAS	1.38199e-05	0.397016
666	7	62560323	63624322	66	16	AF_EAS	5.27842e-05	0.331614
667	7	63624323	67371495	800	100	AF_EAS	0.0014089	0.000224153
668	7	67371496	68458764	397	117	AF_EAS	0.000750121	0.0390034
669	7	68458765	69083424	167	54	AF_EAS	0.0002019	0.227907
670	7	69083425	71874126	800	185	AF_EAS	0.0056522	4.60458e-18
671	7	71874127	74408523	294	72	AF_EAS	0.00156617	3.53517e-05
672	7	74408524	76499312	224	69	AF_EAS	0.00159513	2.4672e-05
673	7	76499313	78460635	814	198	AF_EAS	0.00280073	1.40627e-06
674	7	78460636	80333322	576	128	AF_EAS	0.00171125	0.00021568
675	7	80333323	81714243	421	132	AF_EAS	0.000127514	0.388587
676	7	81714244	83567546	696	168	AF_EAS	0.00161045	0.000736932
677	7	83567547	85570789	565	95	AF_EAS	0.000380684	0.122556
678	7	85570790	88189329	720	115	AF_EAS	0.00202821	9.45084e-06
679	7	88189330	89727016	580	113	AF_EAS	0.00131011	0.00145289
680	7	89727017	92494245	808	135	AF_EAS	0.000454081	0.115779
681	7	92494246	94058818	445	122	AF_EAS	0.00223682	3.47497e-06
682	7	94058819	96432923	769	163	AF_EAS	0.00141688	0.00304919
683	7	96432924	99365083	745	164	AF_EAS	0.00293594	7.71716e-08
685	7	100526291	101731498	276	94	AF_EAS	0.00065132	0.0534334
686	7	101731499	103197911	255	65	AF_EAS	0.000446276	0.0901136
687	7	103197912	103793049	325	88	AF_EAS	0.000891517	0.0150455
688	7	103793050	105681590	730	181	AF_EAS	0.00454872	6.82632e-13
689	7	105681591	107460001	527	131	AF_EAS	0.00233297	2.45215e-06
690	7	107460002	109296362	553	122	AF_EAS	0.000344167	0.214311
691	7	109296363	112125631	792	182	AF_EAS	0.000531583	0.125721
692	7	112125632	113714773	320	61	AF_EAS	0.00148669	2.03919e-05
693	7	113714774	116918288	723	135	AF_EAS	0.00454353	4.55914e-14
694	7	116918289	119074052	466	71	AF_EAS	6.2138e-05	0.376976
695	7	119074053	120269171	201	30	AF_EAS	0.000481436	0.0287837
696	7	120269172	122992990	738	137	AF_EAS	0.000836014	0.0307445
697	7	122992991	125775066	799	118	AF_EAS	0.00114625	0.0066894
698	7	125775067	126869221	384	66	AF_EAS	0.000477947	0.0780982
699	7	126869222	129589868	774	149	AF_EAS	0.00183918	6.18319e-05
700	7	129589869	131635483	587	166	AF_EAS	0.00329748	6.11361e-09
701	7	131635484	133736374	612	142	AF_EAS	0.000911384	0.0251271
702	7	133736375	136111689	889	196	AF_EAS	0.00297997	4.23264e-07
703	7	136111690	138309842	569	169	AF_EAS	0.00231907	1.48309e-05
704	7	138309843	139664085	403	125	AF_EAS	0.00119977	0.00419099
705	7	139664086	141678417	615	134	AF_EAS	0.00155295	0.000628616
706	7	141678418	142659758	275	65	AF_EAS	0.000575488	0.0378621
707	7	142659759	145171422	494	116	AF_EAS	0.00352868	4.29455e-12
708	7	145171423	146397904	286	62	AF_EAS	0.000182088	0.239805
709	7	146397905	147996405	615	145	AF_EAS	0.00112436	0.0135878
710	7	147996406	149500992	420	122	AF_EAS	0.00144772	0.00094294
711	7	149500993	151627123	680	211	AF_EAS	0.00404781	6.72529e-11
712	7	151627124	153033738	347	117	AF_EAS	0.000255513	0.27278
713	7	153033739	154964316	732	205	AF_EAS	0.00322949	7.98965e-08
714	7	154964317	156153106	437	159	AF_EAS	0.00249242	1.09935e-06
715	7	156153107	157635553	519	163	AF_EAS	0.00226094	1.69553e-05
716	7	157635554	159128575	427	120	AF_EAS	0.00122361	0.00209828
717	8	10422	720794	246	99	AF_EAS	0.000647444	0.0494946
718	8	720795	1162980	200	85	AF_EAS	0.00095464	0.00791614
719	8	1162981	1957008	347	143	AF_EAS	0.00317056	7.82913e-09
720	8	1957009	2791987	430	158	AF_EAS	0.00235437	3.46456e-06
721	8	2791988	3361150	410	152	AF_EAS	0.000159302	0.334804
722	8	3361151	3704713	367	131	AF_EAS	0.00041179	0.149539
723	8	3704714	4480374	732	246	AF_EAS	0.00220176	8.7824e-05
724	8	4480375	5146927	494	156	AF_EAS	0.00103901	0.0198411
725	8	5146928	6142331	789	223	AF_EAS	0.00166311	0.000841996
726	8	6142332	7153079	545	183	AF_EAS	0.00187264	0.000199507
728	8	9099582	10118214	469	155	AF_EAS	0.00155141	0.00267651
729	8	10118215	11088309	370	139	AF_EAS	0.000262108	0.212778
730	8	11088310	13394643	791	231	AF_EAS	0.003429	7.31105e-08
731	8	13394644	13945976	380	103	AF_EAS	0.00191623	1.70807e-05
732	8	13945977	15709611	1077	234	AF_EAS	0.00237091	6.16047e-05
733	8	15709612	17300379	658	202	AF_EAS	0.00212587	0.000244478
734	8	17300380	18671055	958	247	AF_EAS	0.00393098	5.34531e-10
735	8	18671056	19221080	300	125	AF_EAS	0.00114905	0.00505507
736	8	19221081	21137819	861	230	AF_EAS	0.00586297	1.04259e-16
737	8	21137820	21901218	315	114	AF_EAS	0.00172272	9.43073e-05
738	8	21901219	23028335	385	145	AF_EAS	0.000826405	0.0387388
739	8	23028336	24672501	679	162	AF_EAS	0.00106404	0.0123038
740	8	24672502	25803980	409	102	AF_EAS	0.000465566	0.119012
741	8	25803981	26900699	528	133	AF_EAS	0.000967853	0.0139503
742	8	26900700	28621013	767	182	AF_EAS	0.0026207	3.90196e-06
743	8	28621014	30534248	567	149	AF_EAS	0.00203085	2.99682e-05
744	8	30534249	33044704	708	161	AF_EAS	0.002108	5.2036e-05
745	8	33044705	34782251	399	61	AF_EAS	0.000253945	0.208045
746	8	34782252	38017236	546	129	AF_EAS	0.000420541	0.119267
747	8	38017237	40054435	549	134	AF_EAS	0.00434819	9.3106e-15
748	8	40054436	42472800	773	179	AF_EAS	0.00359856	1.8334e-09
749	8	42472801	46841315	123	25	AF_EAS	0.00054273	0.0112641
751	8	51464551	53885291	734	139	AF_EAS	0.00252809	7.19852e-07
753	8	54450918	56115358	554	123	AF_EAS	0.000402866	0.126037
754	8	56115359	57212083	335	87	AF_EAS	0.000646916	0.0380038
755	8	57212084	59047312	620	137	AF_EAS	0.00160056	0.000559245
756	8	59047313	60470380	530	131	AF_EAS	0.00207095	1.29501e-05
757	8	60470381	62328609	602	125	AF_EAS	0.00194118	1.43606e-05
758	8	62328610	63426172	421	85	AF_EAS	0.00078328	0.0176945
759	8	63426173	67414034	1102	196	AF_EAS	0.00397261	5.61163e-11
761	8	69121037	72289571	980	219	AF_EAS	0.00213451	7.50496e-05
762	8	72289572	73836479	664	141	AF_EAS	0.00237493	1.91123e-06
763	8	73836480	75684315	684	155	AF_EAS	1.84793e-05	0.421671
764	8	75684316	77379451	539	92	AF_EAS	0.00132897	0.000399025
765	8	77379452	79751440	560	94	AF_EAS	0.000126288	0.30683
766	8	79751441	82016264	624	161	AF_EAS	0.00199148	4.9591e-05
767	8	82016265	83727741	443	93	AF_EAS	0.00089082	0.0165075
768	8	83727742	85110408	344	62	AF_EAS	0.000200242	0.252934
769	8	85110409	85978701	177	29	AF_EAS	0.000619416	0.00473671
773	8	90639839	94303592	895	179	AF_EAS	0.000973942	0.0191922
774	8	94303593	96205877	572	124	AF_EAS	0.00210541	1.14838e-05
775	8	96205878	99403074	1066	251	AF_EAS	0.00365241	1.32695e-07
776	8	99403075	102260923	743	116	AF_EAS	0.00150427	0.000382952
777	8	102260924	104123443	712	203	AF_EAS	0.00342951	2.96378e-09
778	8	104123444	107270871	965	182	AF_EAS	0.000973114	0.0312398
779	8	107270872	109011379	731	132	AF_EAS	0.00127025	0.00416348
780	8	109011380	115011595	1510	173	AF_EAS	0.00530834	2.91642e-16
781	8	115011596	116407568	385	65	AF_EAS	0.000342659	0.124392
782	8	116407569	121179006	1604	264	AF_EAS	0.00245298	5.98329e-05
783	8	121179007	123780420	859	182	AF_EAS	0.00248878	8.65627e-06
784	8	123780421	126401023	968	229	AF_EAS	0.00521118	2.0776e-15
785	8	126401024	128708975	884	247	AF_EAS	0.00304646	1.24541e-06
786	8	128708976	130003883	512	147	AF_EAS	0.00153475	0.000780718
787	8	130003884	131959714	784	171	AF_EAS	0.00239707	1.12448e-05
788	8	131959715	133351162	521	114	AF_EAS	0.000881651	0.0179764
789	8	133351163	134571618	582	146	AF_EAS	0.000664428	0.0588081
790	8	134571619	137120280	1054	207	AF_EAS	0.00217054	6.3834e-05
791	8	137120281	139607999	991	195	AF_EAS	0.00202335	0.000243096
792	8	139608000	141104817	765	190	AF_EAS	0.00266347	2.14447e-06
793	8	141104818	142610656	463	129	AF_EAS	0.00225274	1.12961e-06
794	8	142610657	144214290	465	134	AF_EAS	0.00179638	0.000206947
795	8	144214291	146303867	381	105	AF_EAS	0.00220115	1.19103e-06
796	9	10023	1197526	477	150	AF_EAS	0.00153909	0.00100244
797	9	1197527	2235668	629	199	AF_EAS	0.00329878	2.01907e-08
799	9	2696556	4320425	669	219	AF_EAS	0.00120813	0.0344711
800	9	4320426	6144486	635	215	AF_EAS	0.00339772	1.37358e-08
801	9	6144487	7759242	766	231	AF_EAS	0.00447572	1.19785e-10
802	9	7759243	8919319	643	205	AF_EAS	0.00417124	4.13298e-11
803	9	8919320	11103346	891	252	AF_EAS	0.00402686	3.90131e-09
805	9	12046747	14836080	957	287	AF_EAS	0.00276632	4.15631e-05
806	9	14836081	16364351	552	187	AF_EAS	0.00183624	0.000376482
807	9	16364352	18259692	699	204	AF_EAS	0.0033824	5.27439e-08
808	9	18259693	20288119	791	247	AF_EAS	0.00416991	1.49141e-09
809	9	20288120	21938460	518	141	AF_EAS	0.00163835	0.000311713
810	9	21938461	23424761	409	155	AF_EAS	0.00243856	3.45985e-06
811	9	23424762	24746694	283	115	AF_EAS	0.00186283	3.1299e-05
812	9	24746695	25893114	364	146	AF_EAS	0.00129438	0.00300343
813	9	25893115	27748183	667	201	AF_EAS	0.000240352	0.230298
814	9	27748184	29938115	845	198	AF_EAS	0.00269316	1.80822e-06
815	9	29938116	31118133	341	63	AF_EAS	0.000750069	0.00910912
817	9	31884884	33578941	479	118	AF_EAS	0.00128073	0.00193165
818	9	33578942	34701352	240	47	AF_EAS	0.000162343	0.239548
819	9	34701353	36745892	553	136	AF_EAS	0.00297123	5.73504e-09
820	9	36745893	38717181	676	188	AF_EAS	0.00153578	0.00168609
822	9	69989376	72513605	494	116	AF_EAS	4.70724e-05	0.399566
823	9	72513606	74398785	685	134	AF_EAS	0.00145734	0.00137306
824	9	74398786	75708879	315	63	AF_EAS	0.0013404	0.000258401
825	9	75708880	77543688	412	102	AF_EAS	0.00116417	0.00244076
826	9	77543689	79221991	595	183	AF_EAS	0.00272747	4.13749e-07
827	9	79221992	81510359	766	203	AF_EAS	0.00174449	0.00208643
828	9	81510360	82682883	414	129	AF_EAS	0.00130097	0.00387509
829	9	82682884	83713504	402	94	AF_EAS	0.00124902	0.00110411
830	9	83713505	86070382	656	196	AF_EAS	0.00151286	0.00237806
831	9	86070383	87812366	675	169	AF_EAS	0.00417747	6.65276e-13
832	9	87812367	89493523	436	120	AF_EAS	0.0010715	0.00951155
833	9	89493524	92343050	911	214	AF_EAS	0.00242942	4.04168e-05
834	9	92343051	94165486	681	182	AF_EAS	0.00606619	1.84464e-20
835	9	94165487	96486026	805	147	AF_EAS	0.000851202	0.0521878
836	9	96486027	98547390	649	143	AF_EAS	0.00283561	2.75163e-07
837	9	98547391	100312284	438	96	AF_EAS	0.000606145	0.0564797
838	9	100312285	102281873	655	163	AF_EAS	0.00190637	7.70592e-05
839	9	102281874	104225480	470	90	AF_EAS	0.0016739	0.000106011
840	9	104225481	105967984	748	146	AF_EAS	0.00248908	2.97611e-06
841	9	105967985	107829748	748	137	AF_EAS	0	0.412251
842	9	107829749	110368474	739	175	AF_EAS	0.00198038	0.00013238
843	9	110368475	112864469	1110	256	AF_EAS	0.00376181	1.2559e-08
844	9	112864470	116400502	1295	264	AF_EAS	0.00501194	1.40874e-12
845	9	116400503	119530000	1229	260	AF_EAS	0.00407087	1.15406e-10
846	9	119530001	122117725	950	223	AF_EAS	0.00344379	2.33803e-08
847	9	122117726	124681439	674	145	AF_EAS	0.00252044	1.0672e-06
848	9	124681440	126973204	674	164	AF_EAS	0.00241938	2.52082e-06
849	9	126973205	128927728	502	113	AF_EAS	0.00229011	8.8416e-07
850	9	128927729	130597604	487	119	AF_EAS	0.00146529	0.000392761
851	9	130597605	132047808	279	90	AF_EAS	0.000981143	0.0081826
852	9	132047809	133641809	376	151	AF_EAS	0.000845985	0.0469461
853	9	133641810	134137629	121	43	AF_EAS	0.00047378	0.044737
854	9	134137630	134722557	199	50	AF_EAS	0.000225675	0.199767
855	9	134722558	136612240	598	179	AF_EAS	0.00158483	0.000922865
856	9	136612241	138198537	487	190	AF_EAS	0.00470904	9.7086e-13
857	9	138198538	139575793	265	107	AF_EAS	0.0020913	5.4914e-06
858	9	139575794	141144796	267	85	AF_EAS	0.000356656	0.143255
859	10	60523	1523806	431	121	AF_EAS	0.00102311	0.0114373
860	10	1523807	3350441	1183	262	AF_EAS	0.00536021	1.9668e-13
861	10	3350442	4806512	719	184	AF_EAS	0.00235017	3.56052e-05
862	10	4806513	5699799	457	125	AF_EAS	0.000330068	0.204448
863	10	5699800	7227267	800	225	AF_EAS	0.00431559	1.19006e-10
864	10	7227268	9038946	917	215	AF_EAS	0.00287329	8.71806e-06
865	10	9038947	10631304	619	146	AF_EAS	0.00174944	7.38932e-05
866	10	10631305	12641986	831	242	AF_EAS	0.00288001	3.28057e-06
867	10	12641987	14492886	1081	285	AF_EAS	0.0042301	2.0425e-09
868	10	14492887	16679279	833	239	AF_EAS	0.00350316	2.37882e-08
869	10	16679280	18537267	782	200	AF_EAS	0.00426737	1.63666e-12
870	10	18537268	20311057	810	183	AF_EAS	0.00317303	1.144e-07
871	10	20311058	22282803	613	151	AF_EAS	0.00226965	1.3596e-05
872	10	22282804	24787658	709	185	AF_EAS	0.00363733	6.78102e-10
873	10	24787659	26886615	703	151	AF_EAS	0.00218631	1.2449e-05
874	10	26886616	28736450	640	132	AF_EAS	0.000126931	0.320699
875	10	28736451	30287398	794	206	AF_EAS	0.00325898	7.4662e-08
876	10	30287399	31908498	543	143	AF_EAS	0.00313105	2.18035e-09
877	10	31908499	33908655	648	120	AF_EAS	0.00238996	2.11021e-07
878	10	33908656	35148611	396	86	AF_EAS	0.000338058	0.140371
879	10	35148612	36940703	527	116	AF_EAS	0.00136614	0.00146586
880	10	36940704	43606459	598	101	AF_EAS	0.000480542	0.10068
881	10	43606460	45448031	703	134	AF_EAS	0.00118379	0.0048144
882	10	45448032	47753192	248	60	AF_EAS	0.00021875	0.194982
883	10	47753193	50452594	535	128	AF_EAS	0.000883112	0.0178923
884	10	50452595	52087335	338	95	AF_EAS	0.000290135	0.212323
885	10	52087336	53791679	654	130	AF_EAS	0.00155864	0.000444671
886	10	53791680	55868180	907	196	AF_EAS	0.00247678	1.20718e-05
887	10	55868181	57129543	467	124	AF_EAS	0.00204496	4.86382e-05
888	10	57129544	59159037	590	68	AF_EAS	0.00027552	0.228999
889	10	59159038	60514349	396	61	AF_EAS	0.000909343	0.00208852
890	10	60514350	62085190	626	138	AF_EAS	0.00117994	0.007602
892	10	64198068	66313715	626	111	AF_EAS	0.0028282	1.07446e-08
894	10	67549742	68757629	620	116	AF_EAS	0.00226644	1.75336e-06
895	10	68757630	71054709	652	106	AF_EAS	0.00149035	0.000352585
896	10	71054710	72673145	890	240	AF_EAS	0.00439038	6.23827e-11
897	10	72673146	73730459	583	186	AF_EAS	0.00327194	1.85006e-08
898	10	73730460	75699350	499	63	AF_EAS	0.000223902	0.192724
899	10	75699351	79466701	1215	228	AF_EAS	0.00428959	2.34381e-11
900	10	79466702	80464093	423	110	AF_EAS	0.00107084	0.0020587
901	10	80464094	82568989	789	201	AF_EAS	0.00701092	2.89281e-23
902	10	82568990	83992480	498	122	AF_EAS	0.00145738	0.000662807
903	10	83992481	85920709	801	151	AF_EAS	0.000389533	0.158676
904	10	85920710	87935759	736	147	AF_EAS	4.40698e-05	0.459784
905	10	87935760	89149284	285	74	AF_EAS	0.000245259	0.195785
906	10	89149285	90787308	586	156	AF_EAS	0.0012581	0.0041632
907	10	90787309	92107336	495	119	AF_EAS	0.000166429	0.302609
908	10	92107337	95362627	954	170	AF_EAS	0.00198068	9.21552e-05
909	10	95362628	97064851	543	91	AF_EAS	0.000596805	0.0690845
910	10	97064852	100365649	1299	241	AF_EAS	0.00252487	1.62994e-05
911	10	100365650	102471756	726	119	AF_EAS	0.00163097	0.000207626
912	10	102471757	106139565	1023	164	AF_EAS	0.00983917	8.58305e-49
913	10	106139566	107883349	526	91	AF_EAS	0.00241187	1.65156e-07
914	10	107883350	110353327	897	186	AF_EAS	0.00260219	1.41146e-06
915	10	110353328	112170486	502	105	AF_EAS	0.00220894	9.67597e-07
916	10	112170487	115752990	1440	284	AF_EAS	0.00338925	1.40059e-07
917	10	115752991	117845895	582	125	AF_EAS	0.00145023	0.000755302
918	10	117845896	120999638	1242	276	AF_EAS	0.00394659	5.26083e-09
919	10	120999639	122365962	590	152	AF_EAS	0.00132217	0.00337002
920	10	122365963	123230919	475	122	AF_EAS	0.00213754	3.9818e-06
921	10	123230920	124236219	485	149	AF_EAS	0.00239462	4.56549e-06
922	10	124236220	126143063	853	220	AF_EAS	0.00339385	5.69881e-09
923	10	126143064	127822235	708	182	AF_EAS	0.00324822	3.0324e-08
924	10	127822236	129962926	1101	274	AF_EAS	0.0045848	3.18883e-11
925	10	129962927	130764813	392	140	AF_EAS	0.00105144	0.0101762
926	10	130764814	131740761	417	118	AF_EAS	0.000870514	0.0201379
927	10	131740762	132689305	488	130	AF_EAS	0.00222128	2.76906e-06
928	10	132689306	134038000	591	174	AF_EAS	0.00090726	0.0277022
929	10	134038001	134609626	120	44	AF_EAS	0.000327567	0.0895986
930	10	134609627	135523865	261	54	AF_EAS	0.000545525	0.0302931
931	11	70855	2739889	755	219	AF_EAS	0.0049883	3.14257e-14
932	11	2739890	4466102	522	157	AF_EAS	0.0039419	6.74735e-12
933	11	4466103	6565001	1290	225	AF_EAS	0.00242281	2.83598e-05
935	11	7461583	9555470	859	212	AF_EAS	0.00366295	3.30678e-09
937	11	10371327	12639329	1326	319	AF_EAS	0.00664686	4.14199e-18
938	11	12639330	13629455	424	100	AF_EAS	0.00169661	9.10983e-05
939	11	13629456	15465638	590	113	AF_EAS	0.00229465	1.09809e-06
940	11	15465639	17579783	735	141	AF_EAS	0.00149156	0.00118778
941	11	17579784	19569432	742	172	AF_EAS	0.00268237	1.20649e-06
942	11	19569433	21205247	845	239	AF_EAS	0.00213417	0.000133077
943	11	21205248	22387440	472	131	AF_EAS	0.0006137	0.077742
944	11	22387441	23673700	475	103	AF_EAS	0.000754595	0.0331709
945	11	23673701	25165355	502	142	AF_EAS	0.000892419	0.0221039
[truncated: 5,252 more rows]

## Sheet: Supplementary Note Table 5
Supplementary Note Table 5. Bivariate LAVA results between leukocyte telomere length and five cardiovascular diseases in East Asian populations
Note: results of bivariate LAVA analysis, testing for local genetic signal between leukocyte telomere length and five cardiovascular diseases in regions with a P-value < 0.0001. Tests are two-sided. Only local correlations significant after false discovery rate (FDR) correction for multiple testing were deemed significant and interpreted. locus = index of given local genomic regions; chr = chromo…
P-values lower than an FDR threshold of 0.05 (FDR <0.05) are marked in blue.
locus	chr	start	stop	n_snps	n_pcs	Trait1	Trait2	rho	rho.lower	rho.upper	r2	r2.lower	r2.upper	p	FDR
4	1	4543013	5914790	677	207	LTL_EAS	AF_EAS	0.192814	-0.1517	0.56337	0.0371771	0	0.31739	0.266024	0.615407
21	1	36857534	39550621	851	221	LTL_EAS	AF_EAS	-0.0681463	-0.37986	0.2397	0.00464391	0	0.15013	0.651701	0.829476
59	1	110304093	112347256	859	206	LTL_EAS	AF_EAS	0.28227	-0.03336	0.61559	0.0796761	0	0.37895	0.0769336	0.371541
71	1	164954021	168175845	1338	264	LTL_EAS	AF_EAS	0.158485	-0.18169	0.49647	0.0251174	0	0.24672	0.328228	0.677867
111	1	244512788	245966754	477	161	LTL_EAS	AF_EAS	0.230885	-0.15014	0.65071	0.0533077	0	0.42343	0.239952	0.615407
238	3	2863912	5108349	1079	291	LTL_EAS	AF_EAS	-0.0395909	-0.31931	0.22662	0.00156744	0	0.10583	0.768353	0.850286
326	3	168270620	172048457	1161	250	LTL_EAS	AF_EAS	0.0739931	-0.1097	0.26115	0.00547498	0	0.06823	0.429673	0.740556
421	4	155546840	157596253	731	173	LTL_EAS	AF_EAS	0.226058	-0.18377	0.6802	0.0511021	0	0.46267	0.263524	0.615407
437	4	180547909	183473284	1285	321	LTL_EAS	AF_EAS	0.114429	-0.14393	0.38367	0.0130941	0	0.14753	0.385492	0.716647
646	7	18759807	21715378	1297	299	LTL_EAS	AF_EAS	0.0817774	-0.19997	0.36037	0.00668755	0	0.13133	0.555492	0.7688
734	8	17300380	18671055	958	247	LTL_EAS	AF_EAS	0.0781696	-0.25596	0.42954	0.00611049	0	0.18793	0.644437	0.829476
785	8	126401024	128708975	884	247	LTL_EAS	AF_EAS	0.0933248	-0.26303	0.45817	0.00870952	0	0.21532	0.595053	0.793333
803	9	8919320	11103346	891	252	LTL_EAS	AF_EAS	-0.0523361	-0.40254	0.29915	0.00273906	0	0.17528	0.756311	0.850286
845	9	116400503	119530000	1229	260	LTL_EAS	AF_EAS	0.0038409	-0.29267	0.30342	1.47525e-05	0	0.11654	0.97904	0.979
860	10	1523807	3350441	1183	262	LTL_EAS	AF_EAS	0.157332	-0.11547	0.42905	0.0247534	0	0.18408	0.24377	0.615407
868	10	14492887	16679279	833	239	LTL_EAS	AF_EAS	0.131119	-0.21376	0.49879	0.0171921	0	0.25008	0.442717	0.742324
875	10	28736451	30287398	794	206	LTL_EAS	AF_EAS	-0.0101574	-0.37591	0.3567	0.000103173	0	0.1798	0.95383	0.977886
896	10	71054710	72673145	890	240	LTL_EAS	AF_EAS	-0.0521884	-0.39682	0.28235	0.00272363	0	0.16874	0.752688	0.850286
899	10	75699351	79466701	1215	228	LTL_EAS	AF_EAS	0.234725	-0.07762	0.57671	0.055096	0	0.33259	0.138639	0.506941
912	10	102471757	106139565	1023	164	LTL_EAS	AF_EAS	-0.234668	-0.45995	-0.01312	0.055069	0.00094	0.21156	0.038268	0.316613
918	10	117845896	120999638	1242	276	LTL_EAS	AF_EAS	-0.0512601	-0.3987	0.29131	0.0026276	0	0.17153	0.756991	0.850286
1010	12	11479022	14428647	1215	301	LTL_EAS	AF_EAS	0.0469338	-0.18602	0.28592	0.00220278	0	0.08517	0.687449	0.829476
1036	12	68247435	70817279	1071	220	LTL_EAS	AF_EAS	-0.0928834	-0.29923	0.11453	0.00862732	0	0.08954	0.378778	0.716647
1060	12	114181110	116184485	1049	256	LTL_EAS	AF_EAS	0.333212	0.10849	0.56641	0.11103	0.01177	0.32082	0.00415559	0.12896
1066	12	124721970	127195165	999	261	LTL_EAS	AF_EAS	0.0786086	-0.20875	0.37246	0.00617931	0	0.14035	0.579799	0.79033
1067	12	127195166	128810029	730	216	LTL_EAS	AF_EAS	0.127008	-0.14814	0.40874	0.0161311	0	0.16719	0.361639	0.712508
1068	12	128810030	130612385	921	288	LTL_EAS	AF_EAS	-0.26414	-0.57881	0.02472	0.06977	0	0.33502	0.0738675	0.371541
1126	14	23018666	24905123	616	194	LTL_EAS	AF_EAS	0.119216	-0.09754	0.34475	0.0142126	0	0.11885	0.279275	0.617786
1130	14	32382216	34815856	1047	303	LTL_EAS	AF_EAS	-0.308935	-0.54178	-0.09491	0.0954408	0.00902	0.29352	0.00563553	0.139872
1132	14	35858509	40256601	1484	246	LTL_EAS	AF_EAS	-0.19745	-0.52575	0.10155	0.0389865	0	0.27641	0.191123	0.607282
1165	14	95947053	97572724	789	216	LTL_EAS	AF_EAS	0.338055	0.05773	0.65055	0.114281	0.00418	0.42322	0.0215688	0.316613
1212	15	96473838	98030720	541	188	LTL_EAS	AF_EAS	-0.0557498	-0.47824	0.34633	0.00310804	0	0.24587	0.776294	0.85154
1223	16	8961641	10868121	825	222	LTL_EAS	AF_EAS	0.205035	-0.16189	0.60067	0.0420395	0	0.3608	0.257874	0.615407
1224	16	10868122	12612116	645	181	LTL_EAS	AF_EAS	0.128047	-0.26445	0.5352	0.0163959	0	0.29127	0.505679	0.745425
1233	16	25725417	27795175	718	226	LTL_EAS	AF_EAS	0.185945	-0.14327	0.53127	0.0345755	0	0.28225	0.262553	0.615407
1299	18	10644	2405380	779	209	LTL_EAS	AF_EAS	0.219573	-0.13464	0.60316	0.0482124	0	0.36381	0.220392	0.615407
1324	18	47731000	51061437	1219	245	LTL_EAS	AF_EAS	-0.477728	-0.78592	-0.21561	0.228224	0.04649	0.61766	0.000667459	0.041354
1336	18	70096917	72982759	1174	281	LTL_EAS	AF_EAS	-0.0920398	-0.38614	0.18073	0.00847133	0	0.14985	0.508981	0.745425
1344	19	3179691	5377037	508	194	LTL_EAS	AF_EAS	0.227595	-0.14916	0.63809	0.0517996	0	0.40716	0.228773	0.615407
1346	19	6893561	9016693	512	192	LTL_EAS	AF_EAS	-0.303319	-0.70026	0.0541	0.0920023	0	0.49037	0.0935327	0.413048
1366	19	45579044	47334409	486	161	LTL_EAS	AF_EAS	-0.28163	-0.70101	0.09623	0.0793157	0	0.49142	0.139279	0.506941
1374	20	60479	2244039	905	255	LTL_EAS	AF_EAS	0.0827501	-0.18563	0.36044	0.00684758	0	0.13108	0.536025	0.755273
1376	20	3147025	5415568	872	239	LTL_EAS	AF_EAS	0.124193	-0.23629	0.50489	0.0154239	0	0.25674	0.483483	0.744
1398	20	49239659	52472372	1211	294	LTL_EAS	AF_EAS	-0.114425	-0.36715	0.13119	0.013093	0	0.13498	0.360505	0.712508
1413	21	26470749	29125075	1086	260	LTL_EAS	AF_EAS	0.156333	-0.14899	0.47908	0.0244401	0	0.22995	0.304819	0.663509
1421	21	41389311	43321528	921	265	LTL_EAS	AF_EAS	0.0327506	-0.25671	0.31813	0.0010726	0	0.11466	0.816507	0.880939
71	1	164954021	168175845	1338	264	LTL_EAS	CAD_EAS	-0.303904	-0.68112	0.03186	0.0923575	0	0.46392	0.0763477	0.371541
326	3	168270620	172048457	1161	250	LTL_EAS	CAD_EAS	-0.310153	-0.62187	-0.03681	0.0961952	0.00218	0.38672	0.0256838	0.316613
421	4	155546840	157596253	731	173	LTL_EAS	CAD_EAS	0.105923	-0.22569	0.46721	0.0112197	0	0.22012	0.523473	0.745425
646	7	18759807	21715378	1298	299	LTL_EAS	CAD_EAS	0.00531287	-0.28013	0.28965	2.82266e-05	0	0.10648	0.970142	0.977886
734	8	17300380	18671055	958	247	LTL_EAS	CAD_EAS	0.0168792	-0.39274	0.42336	0.000284906	0	0.22562	0.930519	0.970118
785	8	126401024	128708975	884	247	LTL_EAS	CAD_EAS	0.357094	0.024	0.72361	0.127516	0.0022	0.52361	0.0352229	0.316613
805	9	12046747	14836080	959	287	LTL_EAS	CAD_EAS	0.332228	0.02761	0.68996	0.110375	0.0023	0.47604	0.0382584	0.316613
899	10	75699351	79466701	1215	228	LTL_EAS	CAD_EAS	0.0241115	-0.26942	0.31772	0.000581363	0	0.11809	0.867887	0.919932
912	10	102471757	106139565	1023	164	LTL_EAS	CAD_EAS	-0.228739	-0.49221	0.02656	0.0523215	0	0.24227	0.0809394	0.371541
918	10	117845896	120999638	1243	276	LTL_EAS	CAD_EAS	-0.324393	-0.6565	-0.02439	0.105231	0.00206	0.431	0.0377669	0.316613
1060	12	114181110	116184485	1051	256	LTL_EAS	CAD_EAS	0.382508	0.09101	0.71143	0.146313	0.00862	0.50614	0.0122909	0.217886
1066	12	124721970	127195165	999	261	LTL_EAS	CAD_EAS	-0.121836	-0.4618	0.21503	0.0148439	0	0.21481	0.460146	0.744
1130	14	32382216	34815856	1047	303	LTL_EAS	CAD_EAS	0.119764	-0.20156	0.46169	0.0143435	0	0.21446	0.454116	0.744
1296	17	75392713	77326228	720	265	LTL_EAS	CAD_EAS	0.0751104	-0.20284	0.36584	0.00564158	0	0.13603	0.587932	0.792522
1324	18	47731000	51061437	1219	245	LTL_EAS	CAD_EAS	-0.199004	-0.56634	0.13973	0.0396027	0	0.3211	0.248897	0.615407
1336	18	70096917	72982759	1174	281	LTL_EAS	CAD_EAS	-0.283897	-0.70381	0.07673	0.0805975	0	0.49535	0.119293	0.461125
1344	19	3179691	5377037	508	194	LTL_EAS	CAD_EAS	0.125759	-0.23592	0.50789	0.0158154	0	0.25985	0.484086	0.744
1346	19	6893561	9016693	513	192	LTL_EAS	CAD_EAS	-0.206808	-0.60377	0.16719	0.0427695	0	0.36488	0.256185	0.615407
1366	19	45579044	47334409	486	161	LTL_EAS	CAD_EAS	-0.24629	-0.63872	0.10832	0.0606587	0	0.40797	0.175891	0.589838
1398	20	49239659	52472372	1212	294	LTL_EAS	CAD_EAS	-0.249391	-0.54104	0.02771	0.0621957	0	0.29273	0.0780851	0.371541
1444	22	48212130	49800746	908	278	LTL_EAS	CAD_EAS	0.154777	-0.17256	0.51003	0.023956	0	0.262	0.341444	0.69318
18	1	30161898	32043093	848	213	LTL_EAS	HF_EAS	-0.0676248	-0.4235	0.28051	0.00457311	0	0.19019	0.689264	0.829476
71	1	164954021	168175845	1338	264	LTL_EAS	HF_EAS	-0.0642455	-0.44291	0.30703	0.00412748	0	0.21056	0.725086	0.850286
244	3	12860230	14816750	780	221	LTL_EAS	HF_EAS	-0.198796	-0.55419	0.14223	0.0395199	0	0.30713	0.23803	0.615407
437	4	180547909	183473284	1285	321	LTL_EAS	HF_EAS	0.264295	-0.05865	0.61689	0.0698519	0	0.38055	0.105873	0.436
651	7	31137290	33997077	1156	229	LTL_EAS	HF_EAS	0.0199323	-0.34291	0.38471	0.000397296	0	0.17565	0.908938	0.95522
734	8	17300380	18671055	958	247	LTL_EAS	HF_EAS	0.137936	-0.22053	0.5105	0.0190265	0	0.26264	0.429872	0.740556
785	8	126401024	128708975	884	247	LTL_EAS	HF_EAS	0.0538938	-0.2643	0.38862	0.00290454	0	0.15815	0.734858	0.850286
805	9	12046747	14836080	959	287	LTL_EAS	HF_EAS	-0.170249	-0.44895	0.10609	0.0289846	0	0.20156	0.220479	0.615407
899	10	75699351	79466701	1215	228	LTL_EAS	HF_EAS	-0.358512	-0.75405	-0.00911	0.128531	0.00172	0.56858	0.0497485	0.352711
1010	12	11479022	14428647	1214	301	LTL_EAS	HF_EAS	-0.0610832	-0.36004	0.23647	0.00373115	0	0.13355	0.672647	0.829476
1036	12	68247435	70817279	1073	221	LTL_EAS	HF_EAS	0.00730745	-0.29267	0.30679	5.33989e-05	0	0.12177	0.960451	0.977886
1066	12	124721970	127195165	999	261	LTL_EAS	HF_EAS	-0.132969	-0.5056	0.21785	0.0176808	0	0.25867	0.442828	0.742324
1067	12	127195166	128810029	731	216	LTL_EAS	HF_EAS	0.319858	0.00698	0.67561	0.102309	0.00129	0.45645	0.0511896	0.352711
1068	12	128810030	130612385	921	288	LTL_EAS	HF_EAS	0.198665	-0.10286	0.5219	0.0394677	0	0.27238	0.187924	0.607282
1130	14	32382216	34815856	1047	303	LTL_EAS	HF_EAS	-0.161337	-0.47541	0.13116	0.0260297	0	0.22602	0.273986	0.617745
1238	16	51214364	54450244	1128	243	LTL_EAS	HF_EAS	-0.133835	-0.53802	0.253	0.0179118	0	0.2914	0.477168	0.744
1296	17	75392713	77326228	720	265	LTL_EAS	HF_EAS	0.050521	-0.23117	0.33214	0.00255237	0	0.11656	0.71283	0.850115
1336	18	70096917	72982759	1174	281	LTL_EAS	HF_EAS	-0.11341	-0.48554	0.24058	0.0128618	0	0.23829	0.517627	0.745425
1344	19	3179691	5377037	508	194	LTL_EAS	HF_EAS	0.079689	-0.31531	0.48711	0.00635033	0	0.24441	0.679097	0.829476
1376	20	3147025	5415568	872	239	LTL_EAS	HF_EAS	-0.134166	-0.47834	0.18761	0.0180004	0	0.22882	0.413651	0.740556
1398	20	49239659	52472372	1212	294	LTL_EAS	HF_EAS	-0.125789	-0.42753	0.17676	0.0158229	0	0.18294	0.392667	0.716647
1421	21	41389311	43321528	922	265	LTL_EAS	HF_EAS	0.17755	-0.18439	0.56334	0.031524	0	0.31801	0.321143	0.674644
59	1	110304093	112347256	859	206	LTL_EAS	PAD_EAS	-0.00624638	-0.33878	0.31612	3.90173e-05	0	0.14344	0.968897	0.977886
70	1	162888865	164954020	837	191	LTL_EAS	PAD_EAS	0.0628374	-0.32965	0.4516	0.00394853	0	0.21728	0.735492	0.850286
238	3	2863912	5108349	1080	291	LTL_EAS	PAD_EAS	-0.0729769	-0.39629	0.2497	0.00532563	0	0.1625	0.64788	0.829476
437	4	180547909	183473284	1285	321	LTL_EAS	PAD_EAS	-0.330915	-0.66921	-0.03273	0.109505	0.00233	0.44785	0.0329956	0.316613
646	7	18759807	21715378	1298	299	LTL_EAS	PAD_EAS	0.107123	-0.16195	0.37871	0.0114753	0	0.14342	0.421722	0.740556
651	7	31137290	33997077	1156	229	LTL_EAS	PAD_EAS	-0.0863877	-0.39281	0.21577	0.00746284	0	0.15683	0.558487	0.7688
868	10	14492887	16679279	833	239	LTL_EAS	PAD_EAS	-0.347552	-0.75711	0.00811	0.120792	0	0.57321	0.0545703	0.356337
960	11	59251805	62201641	860	178	LTL_EAS	PAD_EAS	0.094416	-0.29101	0.48503	0.00891439	0	0.24074	0.612373	0.807319
1066	12	124721970	127195165	999	261	LTL_EAS	PAD_EAS	-0.170463	-0.53158	0.16962	0.0290578	0	0.28297	0.315742	0.674644
1068	12	128810030	130612385	921	288	LTL_EAS	PAD_EAS	-0.283743	-0.6825	0.06465	0.0805101	0	0.46581	0.109448	0.436
1132	14	35858509	40256601	1484	246	LTL_EAS	PAD_EAS	-0.038575	-0.37674	0.29923	0.00148803	0	0.1572	0.810888	0.880939
1233	16	25725417	27795175	718	226	LTL_EAS	PAD_EAS	-0.0515409	-0.42246	0.29395	0.00265646	0	0.19172	0.762817	0.850286
1238	16	51214364	54450244	1128	243	LTL_EAS	PAD_EAS	-0.368049	-0.73525	-0.04818	0.13546	0.0041	0.5406	0.0260921	0.316613
1296	17	75392713	77326228	720	265	LTL_EAS	PAD_EAS	0.225703	-0.13401	0.61195	0.0509418	0	0.37449	0.204421	0.615407
1336	18	70096917	72982759	1174	281	LTL_EAS	PAD_EAS	-0.0675789	-0.39888	0.2626	0.00456691	0	0.16332	0.677876	0.829476
1344	19	3179691	5377037	508	194	LTL_EAS	PAD_EAS	-0.128042	-0.53831	0.25415	0.0163948	0	0.29133	0.499129	0.745425
71	1	164954021	168175845	1338	264	LTL_EAS	Stroke_EAS	-0.260713	-0.6667	0.1055	0.0679715	0	0.44449	0.162195	0.573943
326	3	168270620	172048457	1161	250	LTL_EAS	Stroke_EAS	-0.115147	-0.32136	0.0942	0.0132588	0	0.10349	0.268111	0.615407
437	4	180547909	183473284	1285	321	LTL_EAS	Stroke_EAS	-0.123934	-0.41967	0.16535	0.0153596	0	0.17633	0.390738	0.716647
646	7	18759807	21715378	1298	299	LTL_EAS	Stroke_EAS	-0.068654	-0.40945	0.27129	0.00471337	0	0.17407	0.68015	0.829476
785	8	126401024	128708975	884	247	LTL_EAS	Stroke_EAS	0.318992	0.0063	0.67011	0.101756	0.00122	0.44905	0.0477272	0.352711
845	9	116400503	119530000	1229	260	LTL_EAS	Stroke_EAS	-0.271025	-0.59731	0.0274	0.0734545	0	0.35678	0.0787709	0.371541
860	10	1523807	3350441	1183	262	LTL_EAS	Stroke_EAS	0.119311	-0.15215	0.39453	0.014235	0	0.15687	0.380321	0.716647
899	10	75699351	79466701	1215	228	LTL_EAS	Stroke_EAS	0.324014	-0.00553	0.68303	0.104985	0	0.46653	0.058103	0.36022
912	10	102471757	106139565	1023	164	LTL_EAS	Stroke_EAS	0.637712	0.3526	0.96304	0.406677	0.12433	0.92744	5.31052e-05	0.0065844
1010	12	11479022	14428647	1214	301	LTL_EAS	Stroke_EAS	0.0912721	-0.1663	0.36386	0.00833059	0	0.13257	0.486033	0.744
1060	12	114181110	116184485	1051	256	LTL_EAS	Stroke_EAS	-0.0989901	-0.39095	0.18232	0.00979903	0	0.15384	0.483926	0.744
1066	12	124721970	127195165	999	261	LTL_EAS	Stroke_EAS	-0.246373	-0.56249	0.04311	0.0606996	0	0.31639	0.0965816	0.413048
1067	12	127195166	128810029	731	216	LTL_EAS	Stroke_EAS	0.276383	-0.02584	0.61261	0.0763876	0	0.3753	0.0772221	0.371541
1130	14	32382216	34815856	1047	303	LTL_EAS	Stroke_EAS	0.104947	-0.23014	0.44922	0.0110138	0	0.20285	0.518941	0.745425
1132	14	35858509	40256601	1484	246	LTL_EAS	Stroke_EAS	-0.405162	-0.76303	-0.09803	0.164156	0.01003	0.58221	0.0111345	0.217886
1233	16	25725417	27795175	718	226	LTL_EAS	Stroke_EAS	-0.548761	-0.92753	-0.23446	0.301139	0.05497	0.86031	0.00107308	0.0442267
1296	17	75392713	77326228	720	265	LTL_EAS	Stroke_EAS	-0.268589	-0.72242	0.13031	0.0721402	0	0.52188	0.170206	0.585556
1336	18	70096917	72982759	1174	281	LTL_EAS	Stroke_EAS	-0.199118	-0.55737	0.13502	0.0396478	0	0.31066	0.232007	0.615407
1413	21	26470749	29125075	1086	260	LTL_EAS	Stroke_EAS	-0.0338318	-0.35762	0.28997	0.00114459	0	0.147	0.82802	0.885103

## Sheet: Supplementary Note Table 6
Supplementary Note Table 6. Causal relationship between leukocyte telomere length and five cardiovascular diseases in East Asian populations
LCV results of leukocyte telomere length and five cardiovascular diseases in East Asian populations
Note: causal associations were quantified by genetic causal proportion. Tests are one-sided and only tests significant after correcting for multiple testing were interpreted. gcp = genetic causal proportion; gcp_se = standard error of gcp; gcp_p = p-value of the gcp; rho = genetic correlation; rho_se = standard error of rho; rho_p = p-value of the rho.
P-values lower than the Bonferroni-corrected threshold (P = 0.05/5 combinations = 0.01) and GCP larger than 0.6 are considered significant and marked in blue.
Trait 1	Trait 2	gcp	gcp_se	gcp_p	rho	rho_se
TL_EAS	AF_EAS	-0.26568	0.402863	0.779758	0.0421779	0.120799
TL_EAS	CAD_EAS	0.675597	0.211492	3.83233e-05	-0.0867447	0.0965822
TL_EAS	HF_EAS	-0.12969	0.522819	0.789204	-0.127042	0.166229
TL_EAS	PAD_EAS	-0.0586903	0.447011	0.802191	-0.297755	0.139118
TL_EAS	Stroke_EAS	-0.167743	0.494935	0.872447	0.0219863	0.157347

## Sheet: Supplementary Note Table 7
Supplementary Table 7. Genomic risk loci identified for PLACO results of leukocyte telomere length and five cardiovascular diseases in East Asian populations using FUMA
Note: for comparative purposes we report whether the identified loci overlap with the loci identified by PLACO analysis and reported by single trait GWAS analysis. We therefore defined the locus as 500 kb before and after the position of the index variant. Genomic risk loci association tests are two-sided and significance is determined by surpassing the genome-wide significance threshold, P < 5 x…
Trait	Locus	Unique SNP ID	rsID	Cytoband	CHR	BP	P	Start	End	nSNPs	nGWASSNPs	nIndSigSNPs	IndSigSNPs	nLeadSNPs	LeadSNPs	Functional annotation	CADD	RDB	position mapping	Results from LTL_EAS GWAS analysis							Results from CVD_EAS GWAS analysis							COLOC
																				ORLTL_EAS	PLTL_EAS	Overlap	TopSNP	CHR	Start	End	ORCVD_EAS	PCVD_EAS	Overlap	TopSNP	CHR	Start	End	PP.H1	PP.H2	PP.H3	PP.H4	Best causal SNP	SNP.PP.H4
LTL_EAS-AF_EAS	1	4:111604483:A:G	rs2723296	4q25	4	111604483	7.14915e-10	111543323	111604727	76	14	3	rs2723296;rs2595100;rs1448818	1	rs2723296	intergenic	8.144	7	PITX2	1.0247	0.0122205	no					0.8311	6.45952e-18	yes	rs7434417	4	111550515	111816341	3.30096e-126	0.965295	0.023298	0.0114069	rs12639654	0.112857
LTL_EAS-AF_EAS	2	10:105794788:C:G	rs79019201	10q24.33	10	105794788	2.60164e-11	105722281	105801818	110	86	1	rs79019201	1	rs79019201	intronic	8.428	5	SLK, COL17A1	1.1432	8.85e-15	yes	rs75263779	10	105671683	105801818	0.9021	0.00091029	no					1.51324e-18	9.36022e-16	1	5.75154e-18	rs12415501	0.283293
LTL_EAS-CAD_EAS	1	1:226611505:C:T	rs1527363	1q42.12	1	226611505	3.42095e-08	226537388	226645345	63	4	1	rs1527363	1	rs1527363	intergenic	2.773	NA	PARP1	0.9303	2.4e-15	yes	rs892348	1	226537388	226653478	1.0228	0.0236136	no					0.899122	3.3108e-12	0.0891785	0.0116996	rs892348	0.0714929
LTL_EAS-CAD_EAS	2	2:21206275:C:G	rs11124924	2p24.1	2	21206275	2.15634e-08	21120265	21252534	34	5	1	rs11124924	1	rs11124924	intergenic	0.76	5	APOB	1.04	0.0011017	no					0.9202	1.68768e-08	yes	rs12469758	2	20789983	21538345	2.04982e-15	0.962619	0.0285918	0.00878936	rs12469758	1
LTL_EAS-CAD_EAS	3	3:169528523:G:T	rs9831661	3q26.2	3	169528523	3.83311e-11	169476991	169582223	128	57	3	rs9831661;rs9814802;rs6789970	1	rs9831661	intronic	1.005	5	ACTRT3, MYNN, LRRC34, LRRIQ4, LRRC31	1.0928	1.18e-20	yes	rs28626343	3	169392323	169582223	0.9712	0.00615952	no					0.817751	2.81294e-35	0.049641	0.132608	rs35446936	0.267835
LTL_EAS-CAD_EAS	4	10:105699607:C:T	rs75263779	10q24.33	10	105699607	5.12524e-09	105636604	105789509	78	12	3	rs75263779;rs7906534;rs35168839	2	rs75263779;rs35168839	intergenic	3.788	5	STN1, SLK, COL17A1	1.1976	1.34e-21	yes	rs75263779	10	105671683	105801818	0.9609	0.0356184	no					0.500991	4.3417e-16	0.463811	0.0351978	rs75263779	0.436084
LTL_EAS-CAD_EAS	5	12:111370484:A:G	rs6489838	12q24.11	12	111370484	9.67014e-11	111359712	111412908	100	4	1	rs6489838	1	rs6489838	intergenic	0.012	7	MYL2	0.9769	0.0144067	no					0.9014	3.26309e-23	yes	rs3858704	12	111301027	113522774	9.00115e-54	0.978892	0.0111538	0.00995456	rs3858704	0.598779
LTL_EAS-HF_EAS	1	1:226542049:A:G	rs6426551	1q42.12	1	226542049	4.56679e-08	226537388	226610512	51	1	1	rs6426551	1	rs6426551	intergenic	2.432	5	PARP1	0.9331	1.13e-14	yes	rs892348	1	226537388	226653478	1.0322	0.0381138	no					0.934519	1.6621e-12	0.0447548	0.0207262	rs752307	0.0727622
LTL_EAS-HF_EAS	2	20:62309839:A:G	rs6010620	20q13.33	20	62309839	4.14246e-09	62275844	62335293	58	21	1	rs6010620	1	rs6010620	intronic	5.174	2b	STMN3, RTEL1, TNFRSF6B, ARFRP1, ZGPAT	0.9442	8.98e-09	yes	rs6010620	20	62275844	62335293	1.0597	0.00137517	no					0.400802	5.78018e-05	0.0227798	0.575369	rs6010620	0.179161
LTL_EAS-Stroke_EAS	1	3:169480204:A:G	rs12630450	3q26.2	3	169480204	1.93512e-10	169476991	169528523	41	17	1	rs12630450	1	rs12630450	intergenic	2.038	7	ACTRT3, MYNN, LRRC34	1.0933	6.6e-21	yes	rs28626343	3	169392323	169582223	0.9704	0.020302	no					0.886219	1.62873e-35	0.0287346	0.0850459	rs2293607	0.288758
LTL_EAS-Stroke_EAS	2	10:105725995:A:G	rs10883955	10q24.33	10	105725995	9.03139e-16	105585518	105801818	318	197	6	rs4918065;rs77997712;rs2476945;rs10786772;rs10883955;rs12250162	2	rs4918065;rs10883955	upstream	3.091	7	SH3PXD2A, STN1, SLK, COL17A1	1.0867	3.24e-13	yes	rs75263779	10	105671683	105801818	1.0626	2.7318e-06	yes	rs55983834	10	105595430	105694487	0.000119133	9.35638e-16	0.99959	0.000291034	rs75263779	0.234632

## Sheet: Supplementary Note Table 8
Supplementary Note Table 8. Genomic risk loci identified for single trait GWAS results of leukocyte telomere length and five cardiovascular diseases in East Asian populations using FUMA
Note: We therefore defined the locus as 500 kb before and after the position of the index variant. Genomic risk loci association tests are two-sided and significance is determined by surpassing the genome-wide significance threshold, P < 5 x 10-8. Locus = number we assigned to a given locus; Unique SNP ID = SNP ID in format 'CHR:BP:A1_A2'; rsID = rsID of the variant; Cytoband = locus; CHR = chrom…
Trait	Locus	Unique SNP ID	rsID	Cytoband	CHR	BP	P	Start	End	nSNPs	nGWASSNPs	nIndSigSNPs	IndSigSNPs	nLeadSNPs	LeadSNPs
LTL_EAS	1	1:226595377:C:G	rs892348	1q42.12	1	226595377	2.24e-16	226537388	226653478	70	56	2	rs892348;rs7554919	1	rs892348
LTL_EAS	2	3:169526272:C:T	rs28626343	3q26.2	3	169526272	1.56e-38	169392323	169582223	236	94	5	rs28626343;rs9878797;rs10936602;rs10936598;rs2068178	1	rs28626343
LTL_EAS	3	4:164029247:A:T	rs2320333	4q32.2	4	164029247	1.08e-08	164007820	164126538	67	4	1	rs2320333	1	rs2320333
LTL_EAS	4	5:1286516:A:C	rs2736100	5p15.33	5	1286516	4.79e-33	1279790	1287340	17	3	3	rs2736100;rs2853677;rs72709458	1	rs2736100
LTL_EAS	5	7:124599749:A:G	rs7776744	7q31.33	7	124599749	2.51e-10	124366188	124907090	779	273	2	rs7776744;rs35918552	1	rs7776744
LTL_EAS	6	10:105699607:C:T	rs75263779	10q24.33	10	105699607	1.34e-21	105671683	105801818	176	120	3	rs75263779;rs7906534;rs12250162	1	rs75263779
LTL_EAS	7	11:108251211:A:C	rs186595	11q22.3	11	108251211	1.37e-09	107983015	108367453	379	87	2	rs186595;rs893279	1	rs186595
LTL_EAS	8	14:24728294:G:T	rs1126432	14q12	14	24728294	1.15e-38	24623428	24730100	29	14	4	rs1126432;rs7151201;rs2277484;rs11629429	1	rs1126432
LTL_EAS	9	20:62309839:A:G	rs6010620	20q13.33	20	62309839	8.98e-09	62275844	62335293	58	2	1	rs6010620	1	rs6010620
AF_EAS	1	1:112392360:G:T	rs12044963	1p13.2	1	112392360	1.13006e-11	112377494	112415583	44	20	1	rs12044963	1	rs12044963
AF_EAS	2	1:170612873:A:G	rs639652	1q24.2	1	170612873	4.42996e-09	170560332	170642899	121	14	1	rs639652	1	rs639652
AF_EAS	3	1:203027021:A:G	rs10920555	1q32.1	1	203027021	2.28981e-13	203021116	203049929	53	30	2	rs10920555;rs4245712	1	rs10920555
AF_EAS	4	2:65272362:A:G	rs2540953	2p14	2	65272362	7.45075e-12	65246123	65386462	110	71	1	rs2540953	1	rs2540953
AF_EAS	5	4:111708438:A:G	rs7434417	4q25	4	111708438	9.66051e-135	111550515	111816341	442	273	17	rs2723319;rs2723320;rs6843082;rs2723329;rs2739200;rs7434417;rs2171591;rs12186158;rs74900776;rs7697491;rs11938968;rs28601812;rs3853445;rs4115273;rs13117254;rs3853438;rs7680240	5	rs2723319;rs7434417;rs7697491;rs11938968;rs7680240
AF_EAS	6	4:174448143:C:T	rs10024737	4q34.1	4	174448143	2.18022e-11	174436866	174616061	73	30	3	rs10024737;rs4695849;rs7698692	2	rs10024737;rs7698692
AF_EAS	7	5:139698365:A:G	rs72798854	5q31.3	5	139698365	6.69993e-09	139544562	139716988	126	6	1	rs72798854	1	rs72798854
AF_EAS	8	7:116200380:A:G	rs1049334	7q31.2	7	116200380	1.83021e-14	116008844	116226422	212	136	4	rs1049334;rs1049337;rs2056865;rs1018859	1	rs1049334
AF_EAS	9	10:21144981:C:T	rs12777530	10p12.31	10	21144981	5.03002e-10	21083261	21202360	8	3	1	rs12777530	1	rs12777530
AF_EAS	10	10:105324774:C:T	rs12415501	10q24.33	10	105324774	2.92012e-24	105296388	105477163	81	62	5	rs12415501;rs80065416;rs902992;rs7067666;rs2047036	3	rs12415501;rs7067666;rs2047036
AF_EAS	11	12:114789226:A:G	rs2384407	12q24.21	12	114789226	4.90004e-15	114786115	114814286	33	21	2	rs2384407;rs7312625	1	rs2384407
AF_EAS	12	16:73053022:A:T	rs2359171	16q22.3	16	73053022	1.26009e-36	72262827	73069888	481	194	9	rs62053164;rs7199274;rs16971314;rs2359171;rs1548373;rs12595893;rs4788685;rs11075959;rs719354	2	rs62053164;rs2359171
CAD_EAS	1	1:56884178:A:G	rs2184103	1p32.2	1	56884178	4.99484e-10	56865106	56887203	12	6	1	rs2184103	1	rs2184103
CAD_EAS	2	1:154428505:A:C	rs6694258	1q21.3	1	154428505	6.32455e-09	154394417	154428505	47	6	1	rs6694258	1	rs6694258
CAD_EAS	3	1:222823529:A:C	rs17465637	1q41	1	222823529	1.2143e-23	222726355	222953928	137	106	9	rs17465637;rs74148132;rs76826638;rs2936045;rs4618978;rs3002141;rs17163337;rs3002146;rs61824282	1	rs17465637
CAD_EAS	4	2:19918336:C:T	rs72775105	2p24.1	2	19918336	4.4732e-13	19916425	19942473	11	3	1	rs72775105	1	rs72775105
CAD_EAS	5	2:21533107:A:T	rs12469758	2p24.1	2	21533107	4.02496e-20	20789983	21538345	70	23	5	rs77651012;rs2854725;rs12469758;rs4665702;rs219509	3	rs77651012;rs2854725;rs12469758
CAD_EAS	6	2:85739984:A:G	rs9751370	2p11.2	2	85739984	8.55827e-11	85730641	85816334	77	8	2	rs9751370;rs7587923	1	rs9751370
CAD_EAS	7	2:164924573:A:G	rs72874178	2q24.3	2	164924573	1.43268e-14	164752160	165050501	208	108	5	rs72874178;rs10930115;rs66780116;rs12615177;rs432795	1	rs72874178
CAD_EAS	8	2:230007140:A:G	rs62190383	2q36.3	2	230007140	2.64605e-09	229977915	230046668	122	47	3	rs62190383;rs73998572;rs59878934	1	rs62190383
CAD_EAS	9	3:14919646:G:T	rs13070927	3p25.1	3	14919646	3.6785e-10	14821017	14953682	75	21	2	rs13070927;rs294607	1	rs13070927
CAD_EAS	10	4:57781754:A:G	rs781663	4q12	4	57781754	2.54258e-09	57713592	57894717	91	13	1	rs781663	1	rs781663
CAD_EAS	11	4:148407652:C:T	rs6841473	4q31.22	4	148407652	1.27313e-20	148364908	148443006	147	97	2	rs6841473;rs10024834	1	rs6841473
CAD_EAS	12	4:156422512:A:G	rs12646335	4q32.1	4	156422512	1.27085e-09	156342994	156678779	112	28	3	rs12646335;rs13126083;rs3796581	2	rs12646335;rs3796581
CAD_EAS	13	5:4085308:C:T	rs4432895	5p15.33	5	4085308	1.09997e-08	4024879	4093529	77	3	1	rs4432895	1	rs4432895
CAD_EAS	14	6:12898884:C:G	rs9395214	6p24.1	6	12898884	3.59976e-20	12886313	12927226	44	26	2	rs9395214;rs7751826	1	rs9395214
CAD_EAS	15	6:28243700:C:G	rs1150725	6p22.1	6	28243700	1.9231e-13	25415117	29215302	1504	391	20	rs3734533;rs7773163;rs59315883;rs112250267;rs9358913;rs989134;rs7356982;rs6901118;rs9467714;rs764285;rs6905021;rs61472021;rs3857549;rs56139485;rs78975171;rs6913042;rs62392668;rs60645096;rs1150725;rs73740878	5	rs3734533;rs989134;rs9467714;rs3857549;rs1150725
CAD_EAS	16	6:33594437:A:C	rs4713643	6p21.31	6	33594437	5.23017e-16	33480435	33863002	96	51	14	rs210143;rs4713643;rs41271247;rs3998115;rs10081055;rs86715;rs68191;rs9368777;rs13209147;rs9469619;rs4713711;rs12196992;rs34460651;rs13214793	4	rs210143;rs4713643;rs9368777;rs12196992
CAD_EAS	17	6:134214525:C:G	rs12190287	6q23.2	6	134214525	2.33899e-21	134098184	134232194	117	96	6	rs11154745;rs4895998;rs6569913;rs12190287;rs1208280;rs3777891	2	rs11154745;rs12190287
CAD_EAS	18	6:161068320:C:G	rs4708876	6q25.3	6	161068320	9.54792e-11	160980330	161089307	6	5	1	rs4708876	1	rs4708876
CAD_EAS	19	7:19052733:A:G	rs57301765	7p21.1	7	19052733	4.59591e-10	19032243	19055797	14	3	1	rs57301765	1	rs57301765
CAD_EAS	20	9:22096055:A:G	rs10757274	9p21.3	9	22096055	2.42713e-72	21961866	22125503	204	134	10	rs7041637;rs3218020;rs10965219;rs77283072;rs10757274;rs1537373;rs4977755;rs10965224;rs4645630;rs10757271	2	rs7041637;rs10757274
CAD_EAS	21	9:136149830:A:G	rs532436	9q34.2	9	136149830	6.30795e-11	136112537	136155000	75	23	3	rs532436;rs9411465;rs9411367	1	rs532436
CAD_EAS	22	10:91005952:A:G	rs2246828	10q23.31	10	91005952	6.40848e-09	91002804	91014061	15	3	1	rs2246828	1	rs2246828
CAD_EAS	23	10:104942244:G:T	rs34747231	10q24.32	10	104942244	3.10254e-15	104550079	105059896	235	124	3	rs34747231;rs10786718;rs12260436	1	rs34747231
CAD_EAS	24	11:202835:A:G	rs79902640	11p15.5	11	202835	8.44515e-11	186458	245702	29	19	1	rs79902640	1	rs79902640
CAD_EAS	25	11:65387378:A:T	rs61744384	11q13.1	11	65387378	4.28008e-11	65349063	65542739	32	16	4	rs61744384;rs3741380;rs12419237;rs1078457	1	rs61744384
CAD_EAS	26	11:103708461:C:G	rs10895529	11q22.3	11	103708461	5.64254e-20	103581897	103769246	145	75	5	rs10895529;rs11226040;rs544071;rs7115794;rs34894449	1	rs10895529
CAD_EAS	27	11:110244228:C:G	rs1443120	11q22.3	11	110244228	4.47207e-16	110224141	110643489	348	168	8	rs1443120;rs12225049;rs7126342;rs1848599;rs10891134;rs11213489;rs969681;rs2846738	1	rs1443120
CAD_EAS	28	11:116662579:C:T	rs651821	11q23.3	11	116662579	1.07183e-09	116586283	116663707	21	2	1	rs651821	1	rs651821
CAD_EAS	29	12:10875525:A:G	rs1042085	12p13.2	12	10875525	2.47249e-10	10843836	10892139	11	8	1	rs1042085	1	rs1042085
CAD_EAS	30	12:20192972:A:G	rs3752728	12p12.2	12	20192972	4.76337e-09	20144754	20213912	187	23	1	rs3752728	1	rs3752728
CAD_EAS	31	12:54536459:C:T	rs7970400	12q13.13	12	54536459	1.04563e-08	54512164	54554363	31	1	1	rs7970400	1	rs7970400
CAD_EAS	32	12:90013089:C:T	rs2681492	12q21.33	12	90013089	4.09353e-12	89969919	90091782	36	26	2	rs2681492;rs10858914	1	rs2681492
CAD_EAS	33	12:95521370:C:T	rs11107909	12q22	12	95521370	1.14235e-16	95346657	95717265	297	151	7	rs2367082;rs7300443;rs7308376;rs11107909;rs10859841;rs12581768;rs12814712	2	rs2367082;rs11107909
CAD_EAS	34	12:110076152:C:G	rs11067623	12q24.11	12	110076152	2.20044e-19	109680100	110262561	366	186	12	rs11608488;rs1045258;rs11066275;rs11066360;rs11067623;rs11067660;rs76539532;rs6606729;rs10774775;rs75628519;rs2241249;rs59596837	3	rs11608488;rs11067623;rs2241249
CAD_EAS	35	12:111705893:A:G	rs3858704	12q24.11	12	111705893	2.45372e-58	111301027	113522774	1544	630	34	rs4766441;rs11065836;rs73415912;rs4766452;rs11611514;rs10849934;rs3858704;rs7301370;rs61943000;rs2339718;rs12423926;rs11066065;rs233721;rs28362508;rs11065904;rs10849974;rs232924;rs232927;rs10492018;rs2384050;rs3803064;rs6489858;rs1078399;rs7965971;rs2240192;rs6489885;rs12818640;rs2072137;rs2701623;rs2384068;rs7315593;rs7963258;rs12177;rs2255284	9	rs4766441;rs73415912;rs3858704;rs12423926;rs11066065;rs232924;rs1078399;rs2240192;rs2255284
CAD_EAS	36	13:29009673:A:T	rs2296285	13q12.3	13	29009673	9.88021e-16	28920923	29022882	112	64	4	rs2296285;rs7339170;rs3751395;rs34961350	1	rs2296285
CAD_EAS	37	13:110954510:C:T	rs9521686	13q34	13	110954510	4.75191e-16	110915135	111049623	63	36	9	rs903352;rs9301442;rs1193071;rs9670769;rs9521686;rs7990017;rs4773143;rs4502089;rs9515203	4	rs903352;rs9521686;rs4502089;rs9515203
CAD_EAS	38	14:100134209:C:T	rs35752324	14q32.2	14	100134209	1.15764e-08	100109464	100184783	36	1	1	rs35752324	1	rs35752324
CAD_EAS	39	15:79007950:C:T	rs11638490	15q25.1	15	79007950	1.2619e-17	78975742	79261894	413	222	6	rs11638490;rs3971829;rs7173743;rs1808757;rs1878396;rs6495318	1	rs11638490
CAD_EAS	40	15:81342304:C:G	rs939534	15q25.1	15	81342304	5.16944e-09	81335243	81360038	26	2	1	rs939534	1	rs939534
CAD_EAS	41	15:89572169:C:T	rs1550476	15q26.1	15	89572169	5.47899e-20	89532662	89581388	104	44	3	rs1550476;rs7177940;rs4932462	1	rs1550476
CAD_EAS	42	15:91435422:A:G	rs12909124	15q26.1	15	91435422	1.79463e-13	91402803	91441729	37	19	2	rs12909124;rs4932178	1	rs12909124
CAD_EAS	43	16:75306402:C:T	rs999675	16q23.1	16	75306402	1.43567e-12	75304366	75519917	506	287	2	rs999675;rs4888422	1	rs999675
CAD_EAS	44	17:59244051:A:G	rs4968533	17q23.2	17	59244051	5.21752e-09	58679312	59259294	522	96	2	rs4968533;rs77825396	1	rs4968533
CAD_EAS	45	17:62400000:A:G	rs1050382	17q23.3	17	62400000	8.63924e-09	62384649	62410411	46	7	1	rs1050382	1	rs1050382
CAD_EAS	46	19:11242307:C:G	rs2738464	19p13.2	19	11242307	1.2023e-14	11235337	11256176	13	7	2	rs2738464;rs4804570	1	rs2738464
CAD_EAS	47	19:41876468:C:T	rs4803459	19q13.2	19	41876468	4.48147e-14	41848347	41890003	64	35	1	rs4803459	1	rs4803459
CAD_EAS	48	19:45412079:C:T	rs7412	19q13.32	19	45412079	3.76401e-13	45389596	45426792	12	4	1	rs7412	1	rs7412
HF_EAS	1	4:111704199:G:T	rs2129981	4q25	4	111704199	9.59542e-09	111642851	111716513	70	4	1	rs2129981	1	rs2129981
PAD_EAS	1	7:19049388:A:G	rs2107595	7p21.1	7	19049388	2.14492e-09	19032243	19055797	14	3	1	rs2107595	1	rs2107595
Stroke_EAS	1	10:105601210:C:T	rs55983834	10q24.33	10	105601210	1.58339e-09	105595430	105694487	88	56	1	rs55983834	1	rs55983834
Stroke_EAS	2	12:111671076:A:G	rs11065836	12q24.11	12	111671076	4.42421e-11	111301027	111706877	114	14	3	rs11065836;rs61943000;rs3858704	2	rs11065836;rs3858704
Stroke_EAS	3	13:110954510:C:T	rs9521686	13q34	13	110954510	4.67072e-09	110954237	110959643	8	1	1	rs9521686	1	rs9521686

## Sheet: Supplementary Note Table 9
Supplementary Table Note 9. Prioritized genes identified for PLACO results of leukocyte telomere length and five cardiovascular diseases in East Asians by functional annotation and mapping of genomic risk loci using FUMA
Note: Prioritized susceptibility variants from PLACO results were mapped by positional mappings using the FUMA SNP2GENE tool with default settings. The SNP locations were defined in reference to the human genome Build 37 (GRCh37/hg19), and only protein-coding genes were included in the analysis. ensg = ENSG ID; Symbol = gene symbol; chr = chromosome; start = starting position of the gene; end = e…
Trait	ensg	symbol	chr	start	end	strand	type	entrezID	HUGO	pLI	ncRVIS	posMapSNPs	posMapMaxCAD_EASD	minGwasP	IndSigSNPs	GenomicLocus	outside
LTL_EAS-AF_EAS	ENSG00000164093	PITX2	4	111538579	111563279	-1	protein_coding	5308	PITX2	0.672789	-1.2397	25	17.44	3.00615e-09	rs1448818;rs2595100;rs2723296	1	no
LTL_EAS-AF_EAS	ENSG00000065613	SLK	10	105726959	105788991	1	protein_coding	9748	SLK	0.428398	-0.261974	109	16.91	2.60164e-11	rs79019201	2	no
LTL_EAS-AF_EAS	ENSG00000065618	COL17A1	10	105791044	105845760	-1	protein_coding	1308	COL17A1	5.82447e-11	-0.457013	16	13.51	2.60164e-11	rs79019201	2	no
LTL_EAS-CAD_EAS	ENSG00000143799	PARP1	1	226548392	226595780	-1	protein_coding	142	PARP1	0.00699693	NA	42	28.1	NA	rs1527363	1	no
LTL_EAS-CAD_EAS	ENSG00000084674	APOB	2	21224301	21266945	-1	protein_coding	338	APOB	5.49085e-16	-0.346892	5	21	NA	rs11124924	2	no
LTL_EAS-CAD_EAS	ENSG00000184378	ACTRT3	3	169484709	169487683	-1	protein_coding	84517	ACTRT3	0.000670124	0.775758	27	21.9	5.85825e-11	rs9831661	3	no
LTL_EAS-CAD_EAS	ENSG00000085274	MYNN	3	169490619	169507504	1	protein_coding	55892	MYNN	0.650144	-1.6491	39	21.9	4.36573e-11	rs9831661	3	no
LTL_EAS-CAD_EAS	ENSG00000171757	LRRC34	3	169511216	169530774	-1	protein_coding	151827	LRRC34	5.88856e-07	-0.228917	35	14.74	3.83311e-11	rs9831661;rs9814802;rs6789970	3	no
LTL_EAS-CAD_EAS	ENSG00000188306	LRRIQ4	3	169539710	169555563	1	protein_coding	344657	LRRIQ4	0.00168555	0.0346851	53	8.458	4.7436e-10	rs9814802;rs6789970	3	no
LTL_EAS-CAD_EAS	ENSG00000114248	LRRC31	3	169556967	169587718	-1	protein_coding	79782	LRRC31	5.24031e-06	-0.2024	63	10.9	4.29118e-10	rs9814802;rs6789970	3	no
LTL_EAS-CAD_EAS	ENSG00000107960	STN1	10	105642300	105677963	-1	protein_coding	79991	STN1	1.3253e-05	NA	4	11.64	NA	rs35168839;rs75263779	4	no
LTL_EAS-CAD_EAS	ENSG00000065613	SLK	10	105726959	105788991	1	protein_coding	9748	SLK	0.428398	-0.261974	35	14.8	9.88216e-09	rs75263779;rs35168839;rs7906534	4	no
LTL_EAS-CAD_EAS	ENSG00000065618	COL17A1	10	105791044	105845760	-1	protein_coding	1308	COL17A1	5.82447e-11	-0.457013	3	6.644	NA	rs7906534	4	no
LTL_EAS-CAD_EAS	ENSG00000111245	MYL2	12	111348623	111358526	-1	protein_coding	4633	MYL2	0.0168131	-0.496132	25	14.65	2.67898e-08	rs6489838	5	no
LTL_EAS-HF_EAS	ENSG00000143799	PARP1	1	226548392	226595780	-1	protein_coding	142	PARP1	0.00699693	NA	46	28.1	4.56679e-08	rs6426551	1	no
LTL_EAS-HF_EAS	ENSG00000197457	STMN3	20	62271061	62284780	-1	protein_coding	50861	STMN3	0.489817	NA	13	6.032	4.62976e-08	rs6010620	2	no
LTL_EAS-HF_EAS	ENSG00000258366	RTEL1	20	62289163	62328416	1	protein_coding	51750	RTEL1	0.777758	-0.00116913	55	20.5	4.14246e-09	rs6010620	2	no
LTL_EAS-HF_EAS	ENSG00000243509	TNFRSF6B	20	62328021	62330037	1	protein_coding	8771	TNFRSF6B	4.83458e-05	-0.141079	19	20.5	NA	rs6010620	2	no
LTL_EAS-HF_EAS	ENSG00000101246	ARFRP1	20	62329996	62339377	-1	protein_coding	10139	ARFRP1	0.135718	-1.17935	16	20.5	NA	rs6010620	2	no
LTL_EAS-HF_EAS	ENSG00000197114	ZGPAT	20	62338817	62367494	1	protein_coding	84619	ZGPAT	2.80186e-05	NA	9	12.77	NA	rs6010620	2	no
LTL_EAS-Stroke_EAS	ENSG00000184378	ACTRT3	3	169484709	169487683	-1	protein_coding	84517	ACTRT3	0.000670124	0.775758	24	13.51	1.93512e-10	rs12630450	1	no
LTL_EAS-Stroke_EAS	ENSG00000085274	MYNN	3	169490619	169507504	1	protein_coding	55892	MYNN	0.650144	-1.6491	31	13.51	2.11994e-10	rs12630450	1	no
LTL_EAS-Stroke_EAS	ENSG00000171757	LRRC34	3	169511216	169530774	-1	protein_coding	151827	LRRC34	5.88856e-07	-0.228917	16	11.05	2.35595e-10	rs12630450	1	no
LTL_EAS-Stroke_EAS	ENSG00000107957	SH3PXD2A	10	105348285	105615301	-1	protein_coding	9644	SH3PXD2A	0.232738	-1.21155	26	15.14	2.33424e-13	rs4918065;rs10786772	2	no
LTL_EAS-Stroke_EAS	ENSG00000107960	STN1	10	105642300	105677963	-1	protein_coding	79991	STN1	1.3253e-05	NA	82	15.65	1.38006e-12	rs10786772;rs4918065;rs77997712	2	no
LTL_EAS-Stroke_EAS	ENSG00000065613	SLK	10	105726959	105788991	1	protein_coding	9748	SLK	0.428398	-0.261974	156	16.91	9.03139e-16	rs77997712;rs12250162;rs2476945;rs10883955	2	no
LTL_EAS-Stroke_EAS	ENSG00000065618	COL17A1	10	105791044	105845760	-1	protein_coding	1308	COL17A1	5.82447e-11	-0.457013	34	13.93	7.17389e-14	rs12250162;rs10883955;rs2476945	2	no

[truncated: 5 more sheets: Supplementary Note Table 10, Supplementary Note Table 11, Supplementary Note Table 12, Supplementary Note Table 13, Supplementary Note Table 14]
